# Supplementary material
Source: publisher figshare collection journal article supplement (https://acs.figshare.com/ndownloader/files/15078434)

# Leveraging a Low-Affinity Diazaspiro Orthosteric Fragment to Reduce Dopamine D3 Receptor (D<sub>3</sub>R) Ligand Promiscuity across Highly Conserved Aminergic G-Protein-Coupled Receptors (GPCRs)

Sean W. Reilly,<sup>†</sup> Aladdin A. Riad,<sup>†</sup> Chia-Ju Hsieh,<sup>†</sup> Kristoffer Sahlholm,<sup>†</sup> Daniel A. Jacome,<sup>‡</sup> Suzy Griffin,<sup>§</sup> Michelle Taylor,<sup>§</sup> Chi-Chang Weng,<sup>†</sup> Kuiying Xu,<sup>†</sup> Nathan Kirschner,<sup>†</sup> Robert R. Luedtke,<sup>§</sup> Christopher Parry,<sup>||</sup> Shipra Malhotra,<sup>||</sup> John Karanicolas,<sup>||</sup> and Robert H. Mach<sup>\*,†</sup>

<sup>†</sup>Department of Radiology, Perelman School of Medicine, University of Pennsylvania, Philadelphia, Pennsylvania 19104, United States

<sup>‡</sup>Department of Systems Pharmacology and Translational Therapeutics, University of Pennsylvania, 421 Curie Boulevard, Philadelphia, Pennsylvania 19104, United States

<sup>§</sup>Department of Pharmacology and Neuroscience, University of North Texas Health Science Center, 3500 Camp Bowie Boulevard, Fort Worth, Texas 76107, United States

<sup>||</sup>Program in Molecular Therapeutics, Fox Chase Cancer Center, 333 Cottman Avenue, Philadelphia, Pennsylvania 19111, United States

## Supporting Information

### Table of Contents

|      |                                                                                                                                                                                                                            |       |
|------|----------------------------------------------------------------------------------------------------------------------------------------------------------------------------------------------------------------------------|-------|
| I.   | Schild plot slopes for <b>1</b> and SB269652 .....                                                                                                                                                                         | S2    |
| II.  | LC–MS Chromatograms for Key Compounds <b>1</b> and <b>31</b> .....                                                                                                                                                         | S3-5  |
| III. | <sup>1</sup> H and <sup>13</sup> C Spectrum of Compounds <b>E</b> , <b>F</b> , <b>4a</b> , <b>5a-c</b> , <b>6a</b> , <b>6c-f</b> , <b>6h</b> , <b>7-24</b> , <b>26</b> , <b>28-30</b> , <b>32</b> , and <b>34-37</b> ..... | S6-83 |

## Schild Plot Slopes for 1 and SB269,652

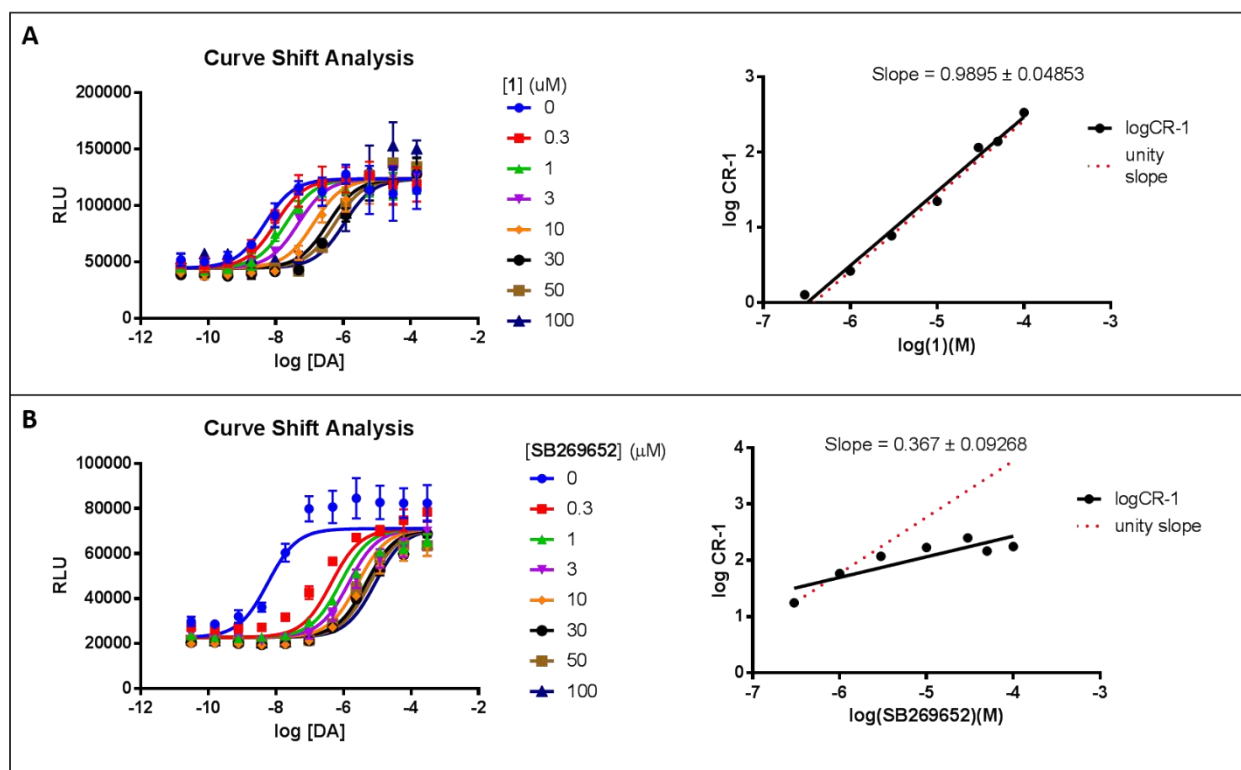

**Figure S1.** (A) Curve shift analysis of dopamine at the D<sub>3</sub>R with or without the presence of increasing concentrations of **1** in a  $\beta$ -arrestin 2 recruitment assay. A Schild plot generated from the concentration-response (CR) curves affords a near linear slope of 1, indicating **1** acts as a competitive antagonist at the receptor. (B) Curve shift analysis of dopamine at the D<sub>3</sub>R with or without the presence of increasing concentrations of SB269,652 in a  $\beta$ -arrestin 2 recruitment assay. A Schild plot generated from the concentration-response (CR) curves affords a slope that deviates significantly from unity, consistent with the allosteric pharmacology of SB269,652 at the receptor. Data points represent the mean  $\pm$  SEM obtained from seven to sixteen replicates.

## LCMS Chromatograms for Key Compounds 1 and 31

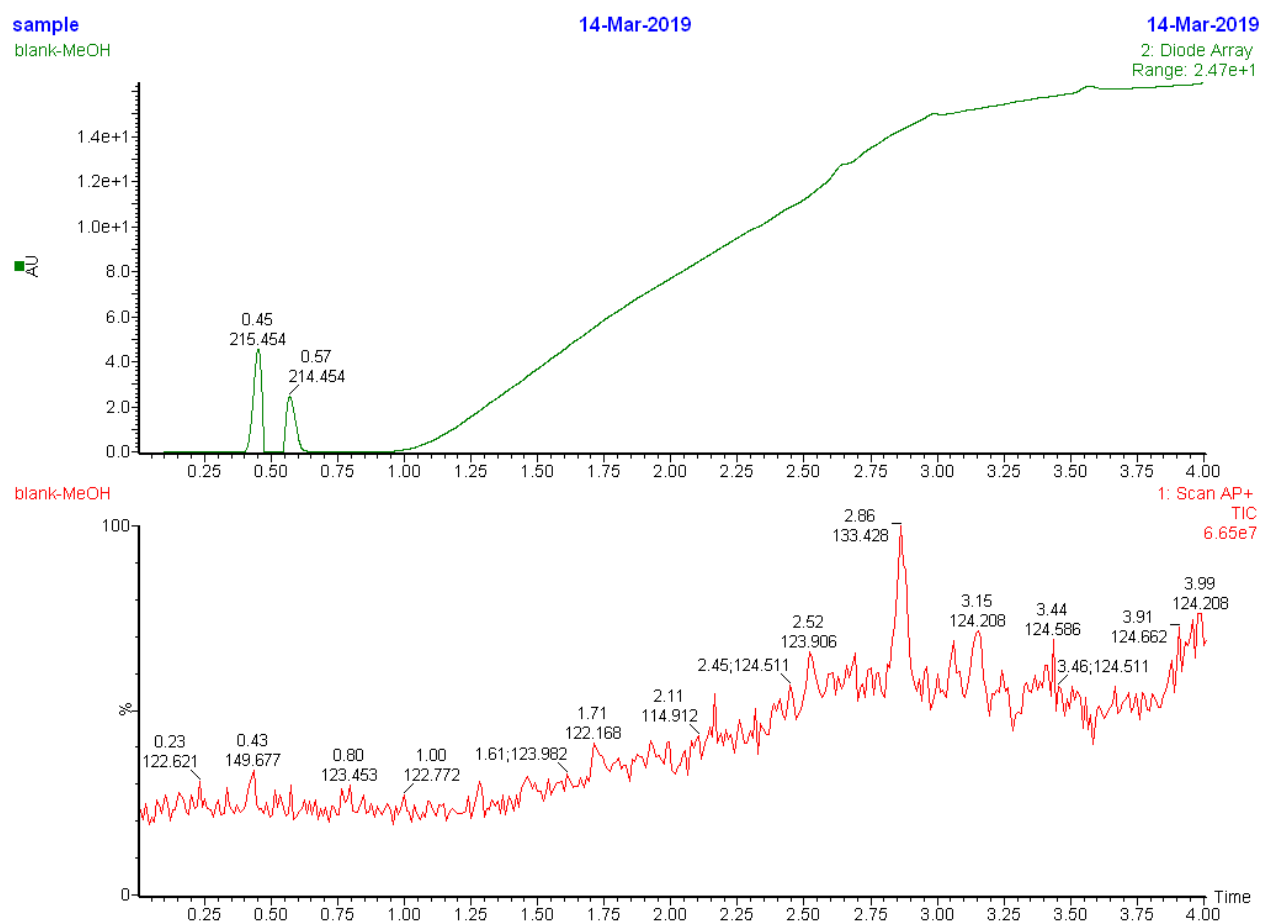

SI Figure 2: The UV and MS trace of our standard solvent methanol

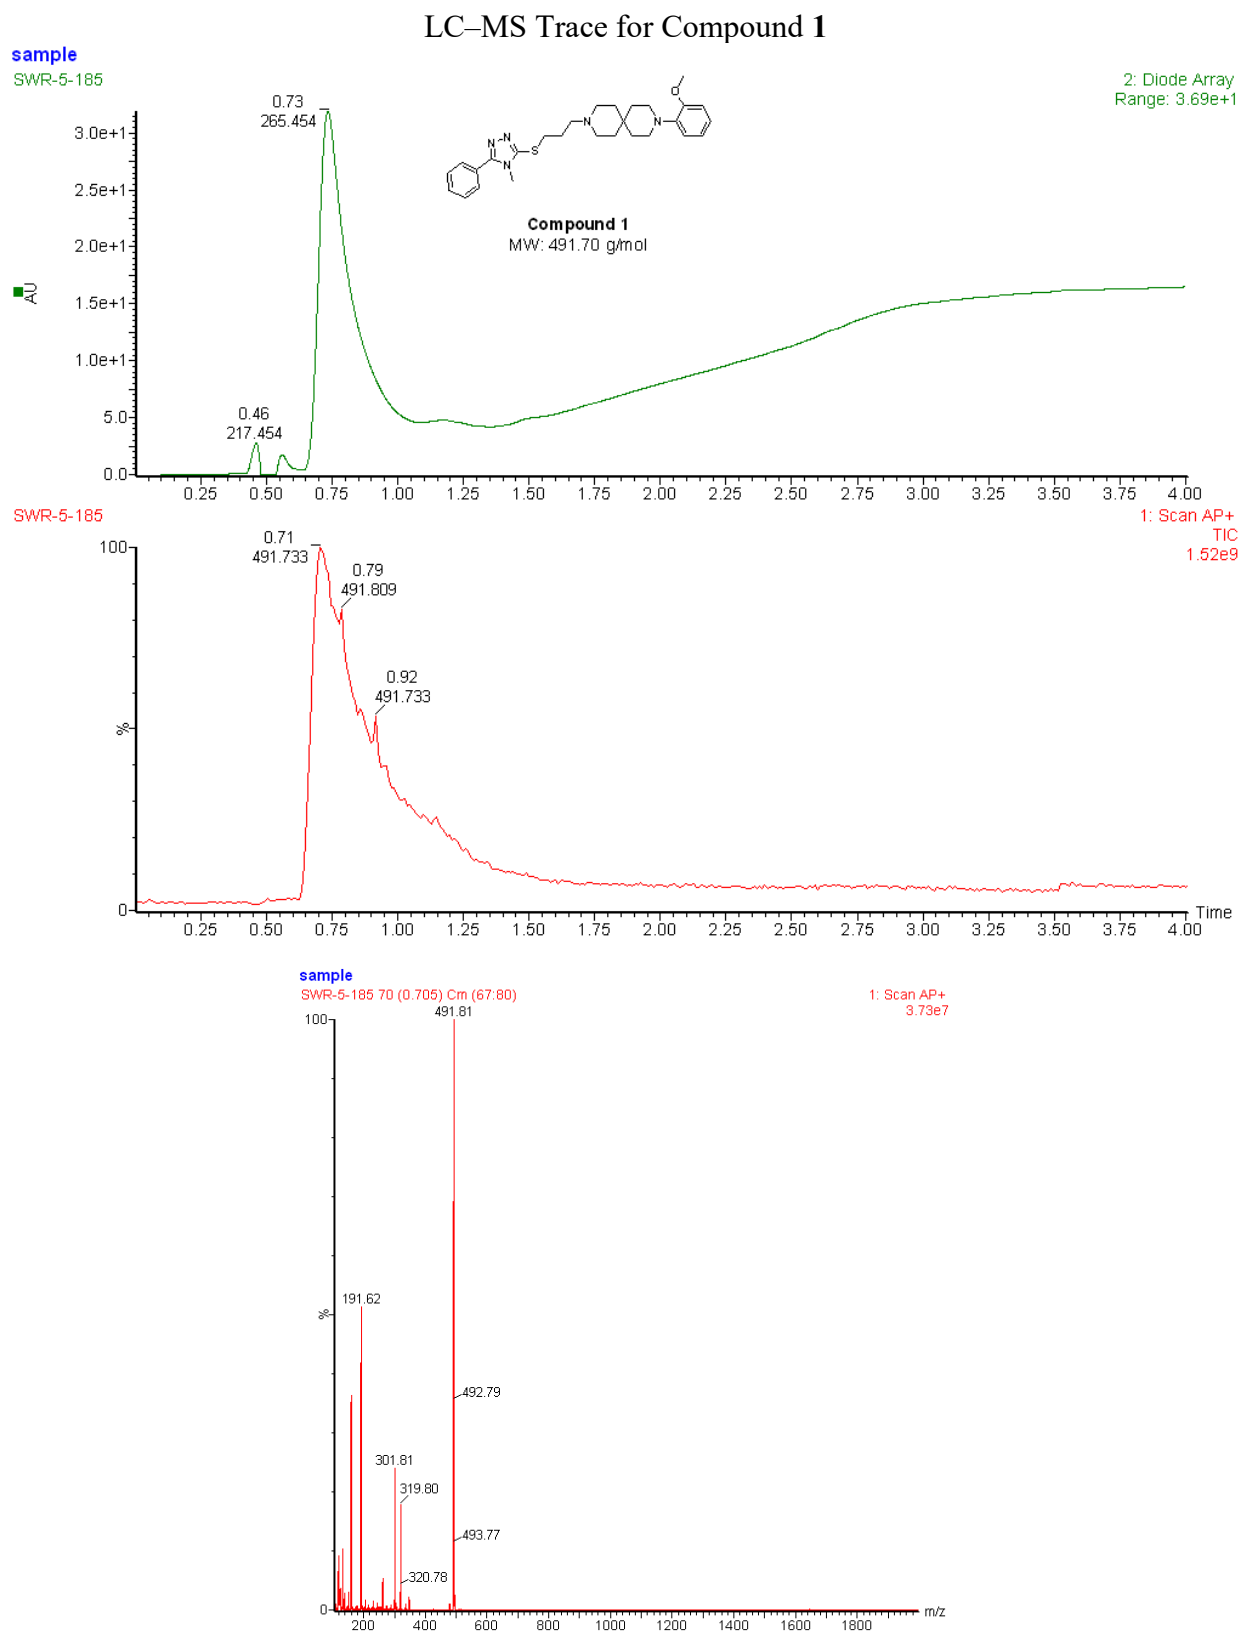

**SI Figure 3: The UV and MS trace of compound 1**

# LC-MS Trace for Compound 31

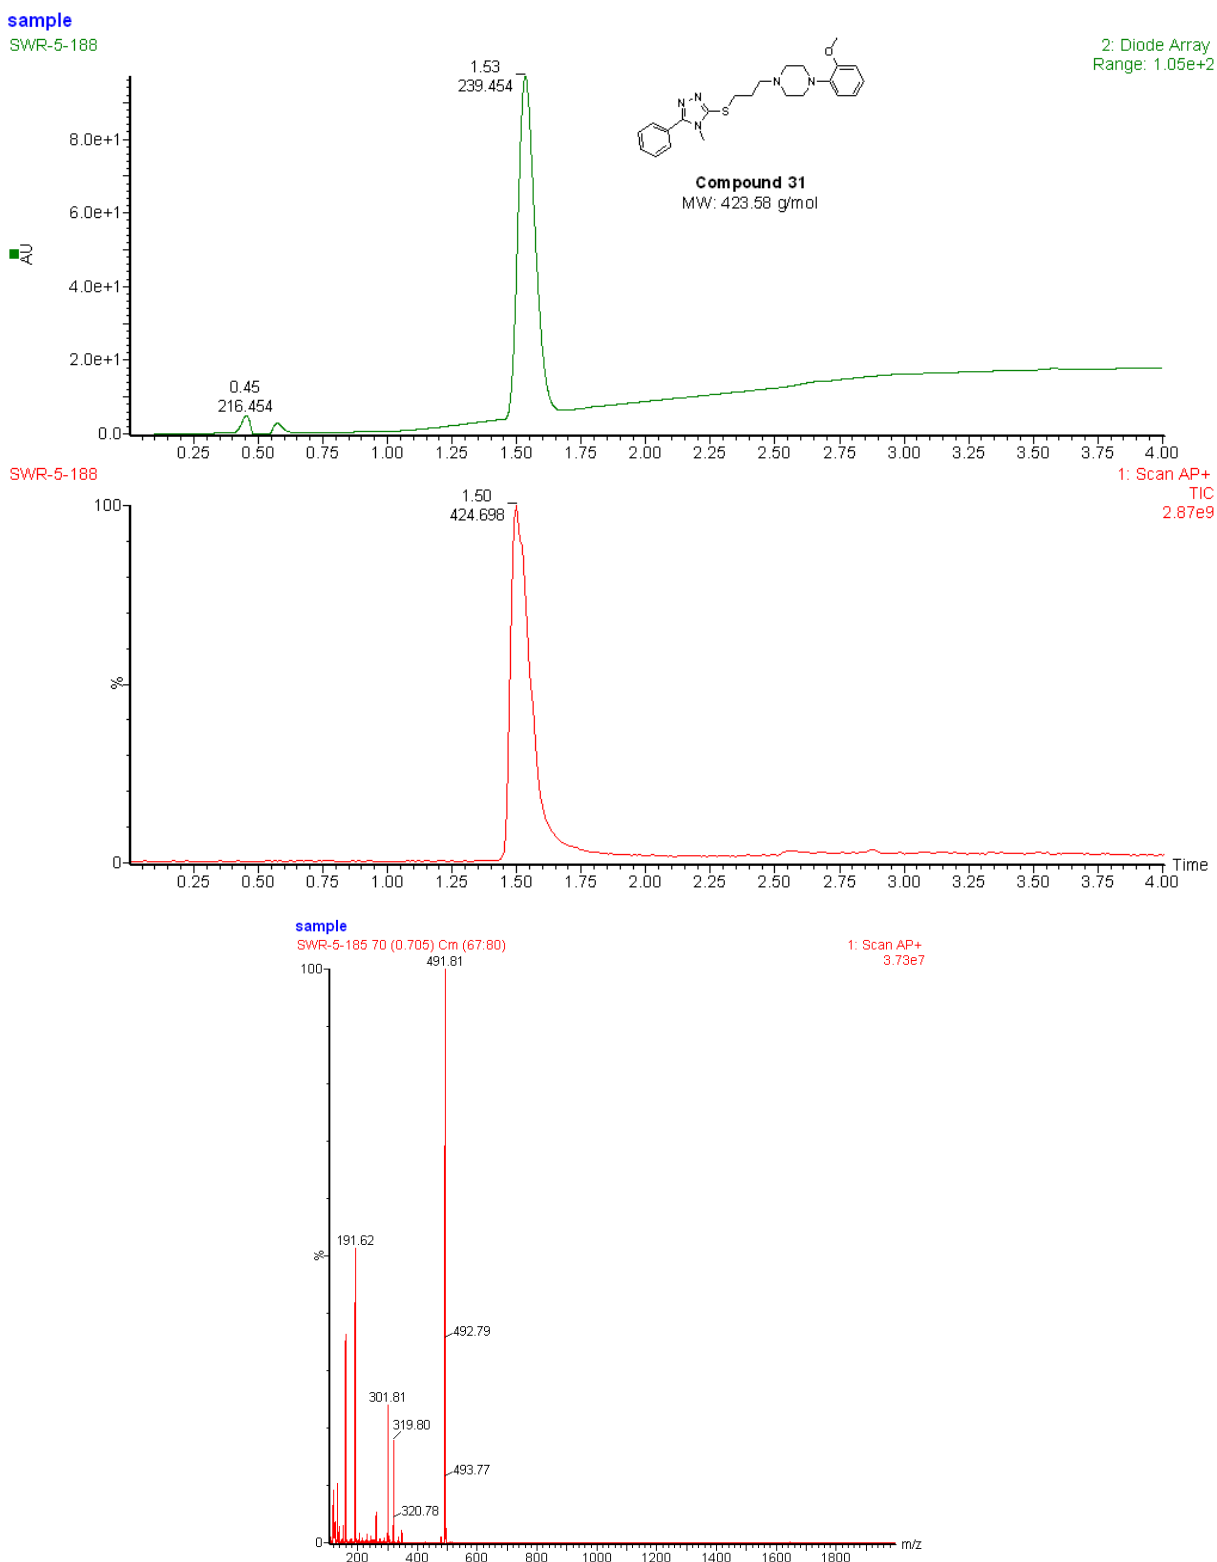

SI Figure 4: The UV and MS trace of compound 31

# <sup>1</sup>H and <sup>13</sup>C Spectrum of Compounds

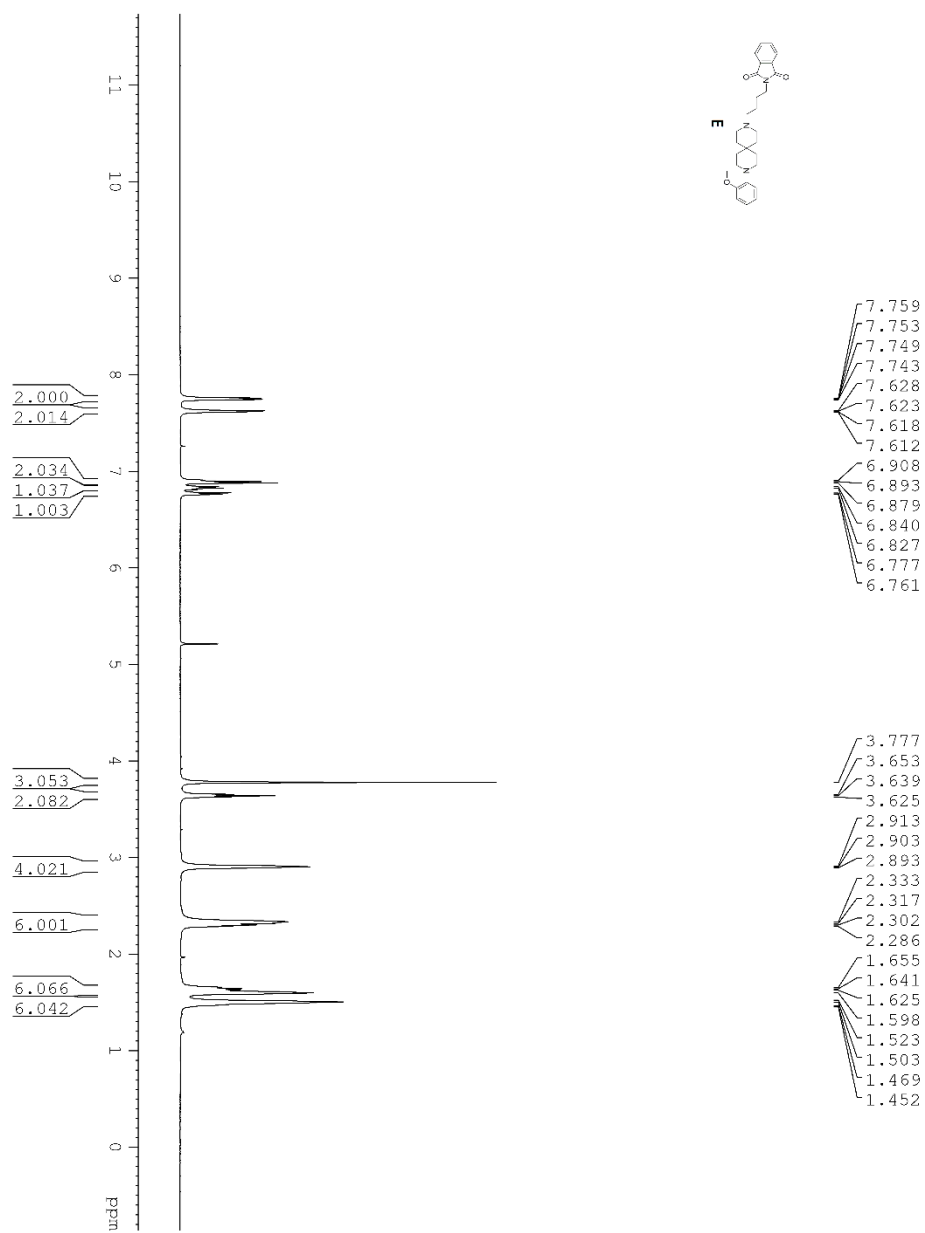

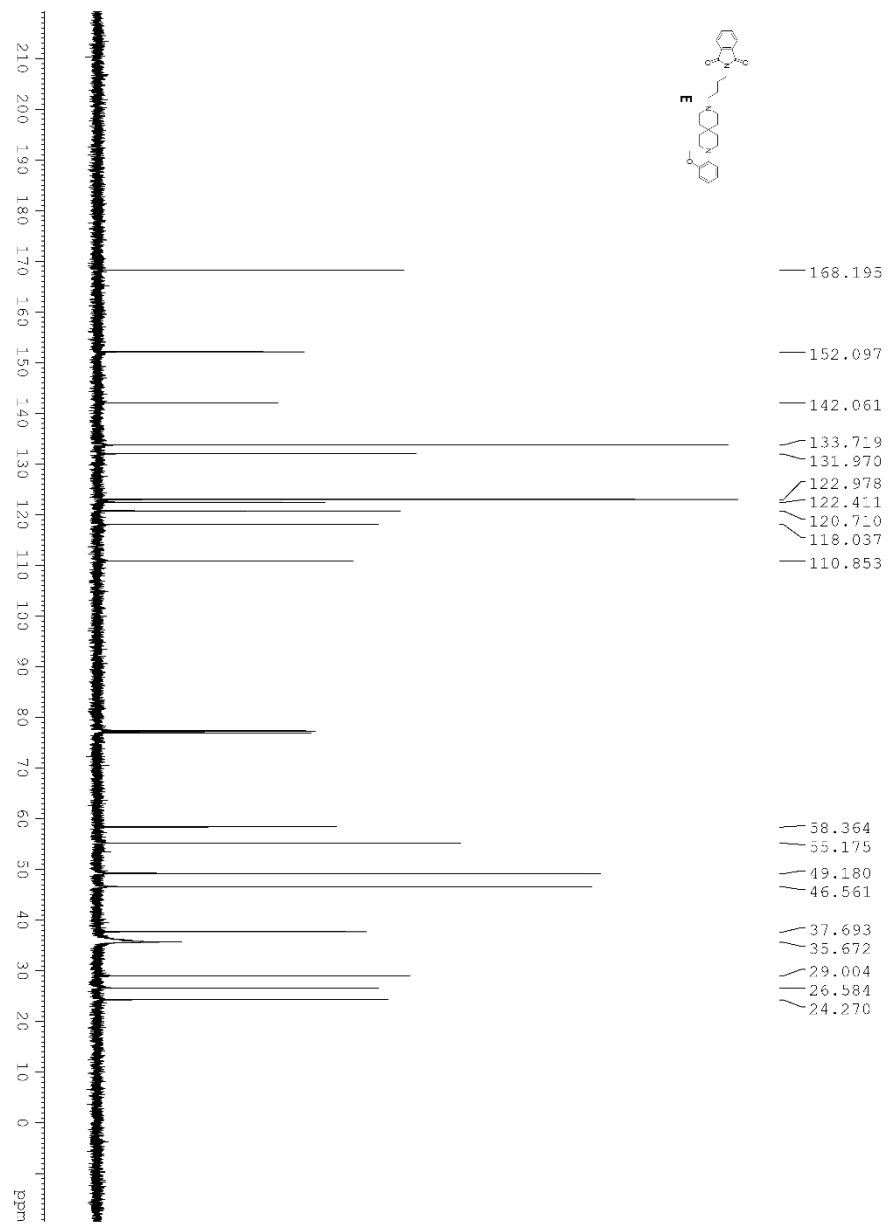

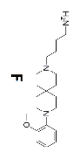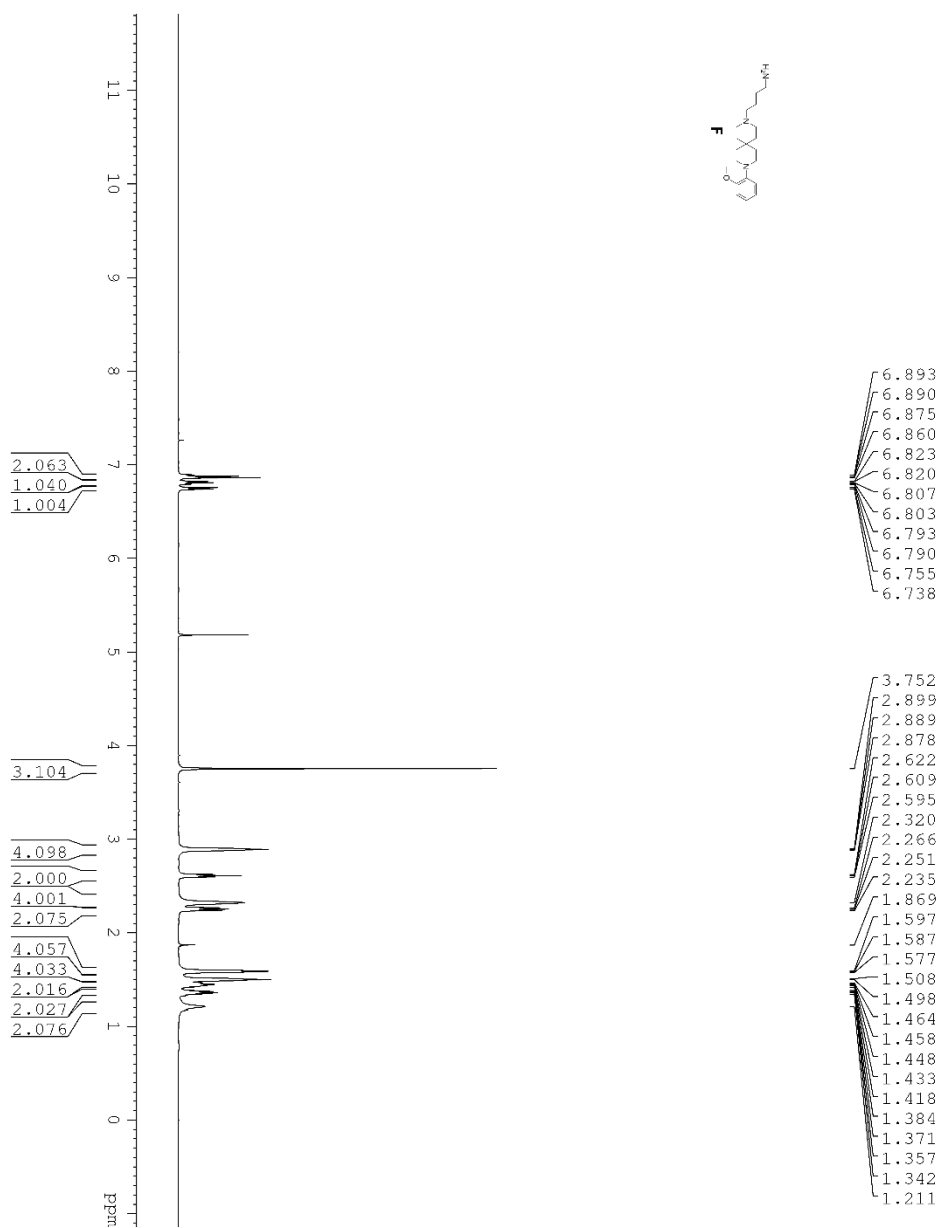



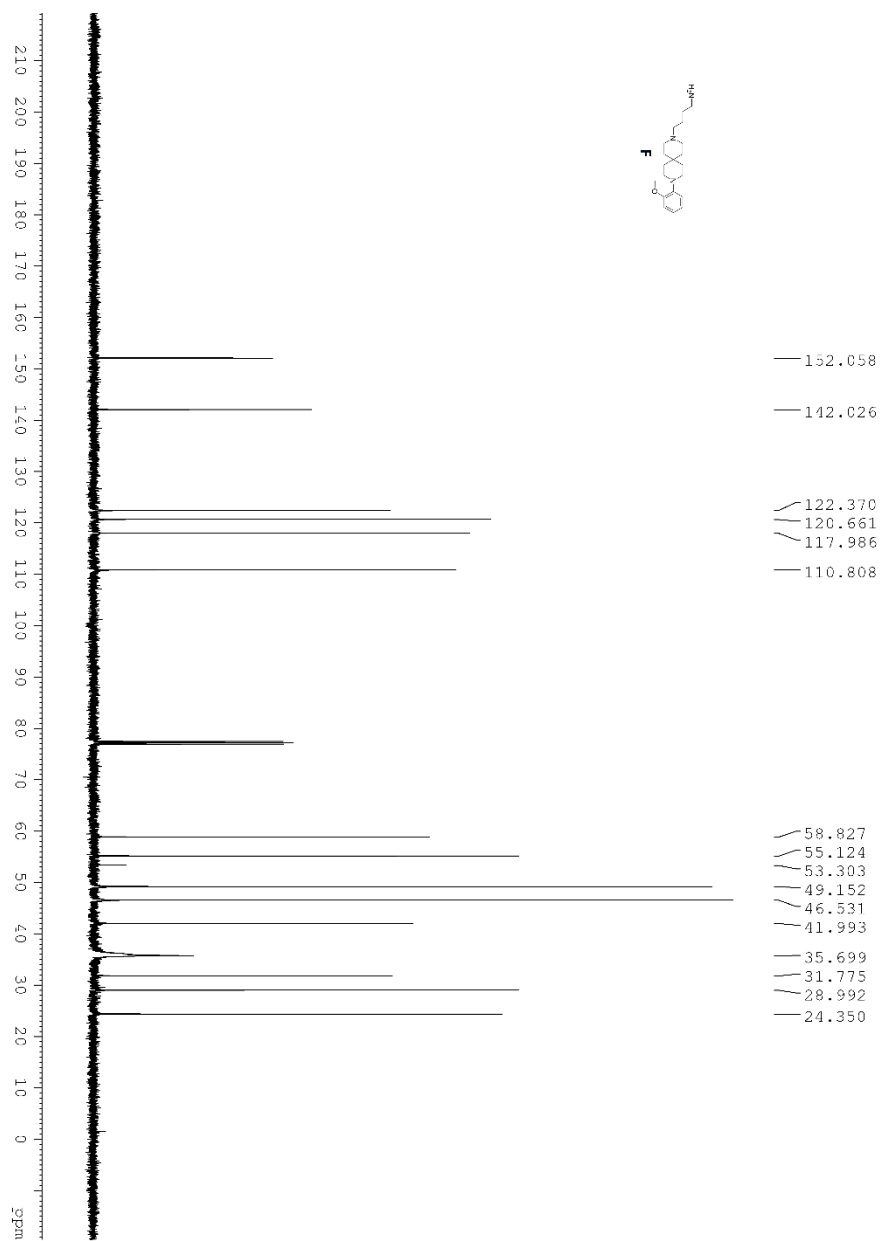

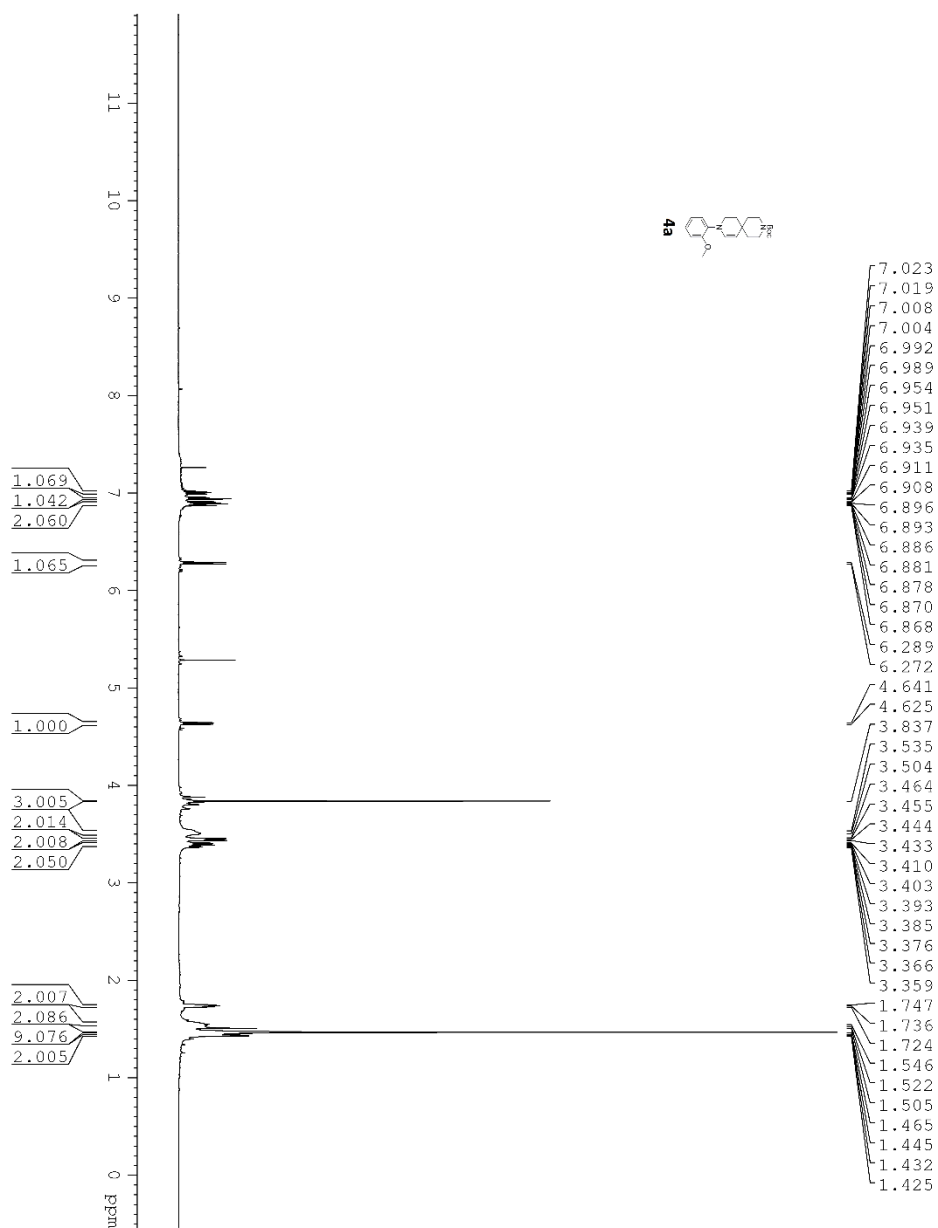

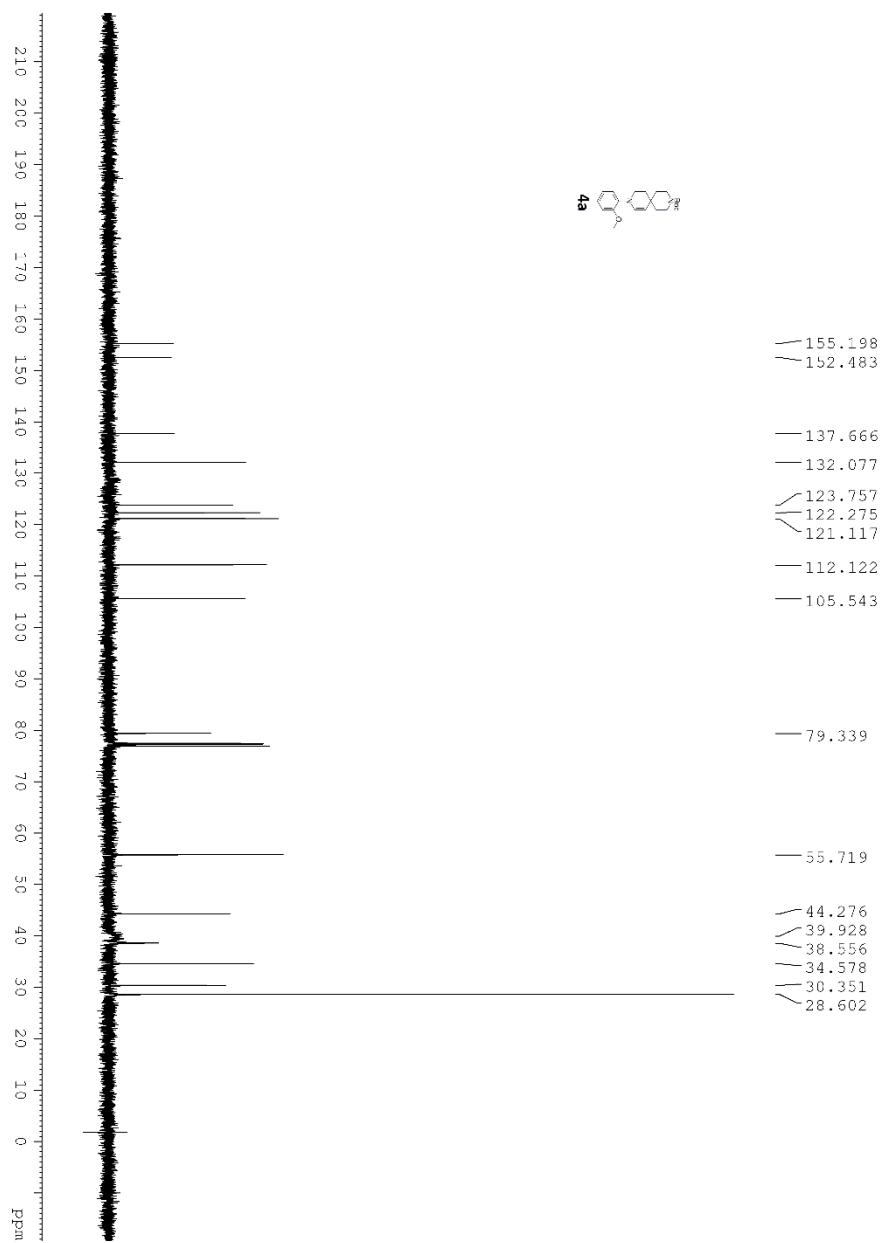

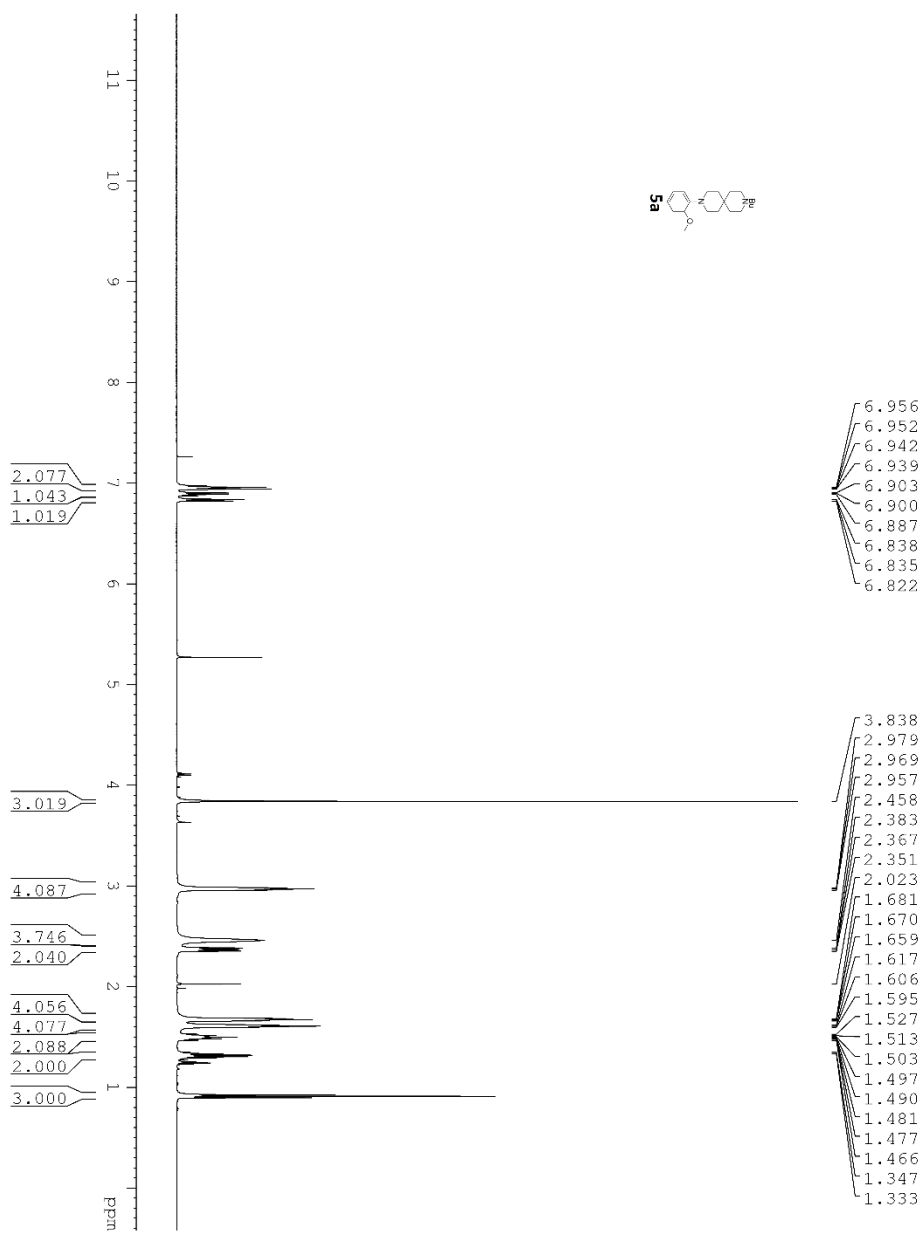

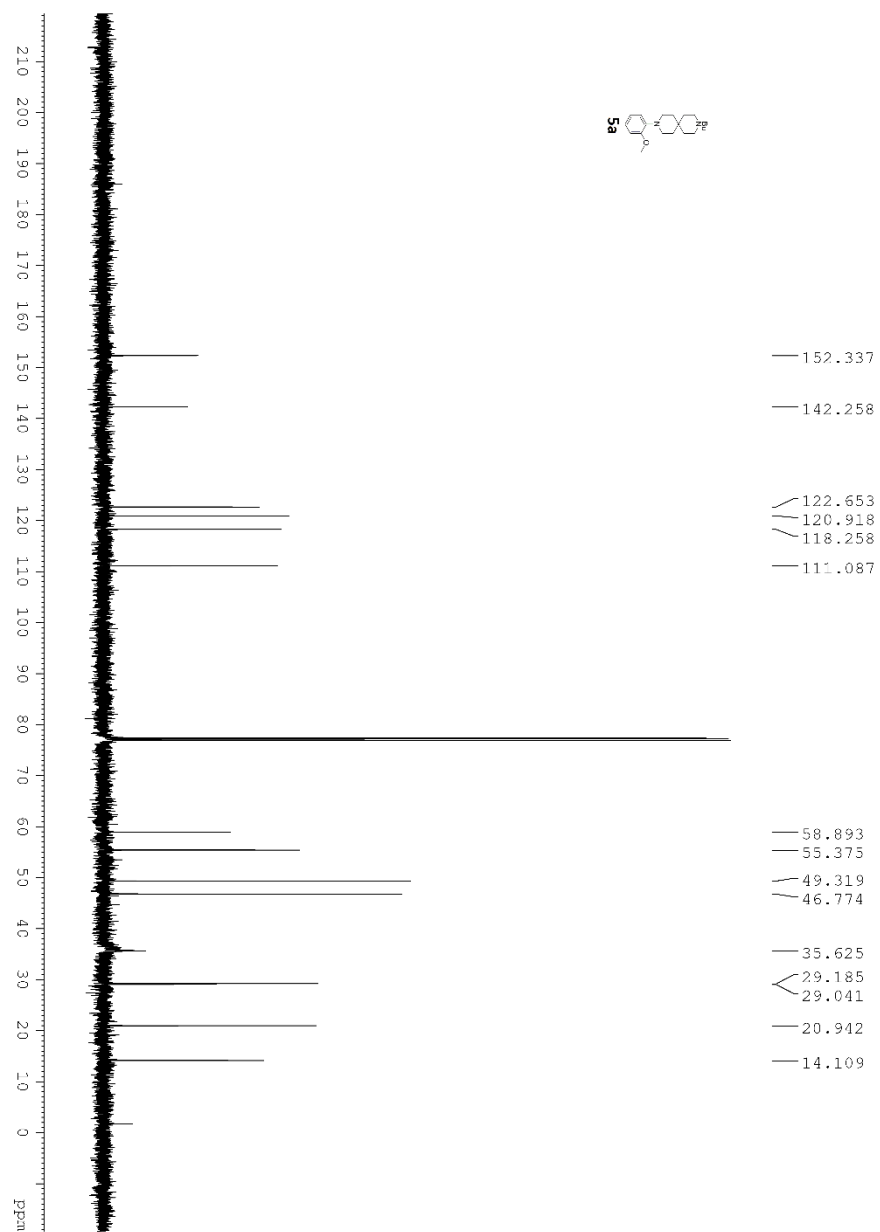

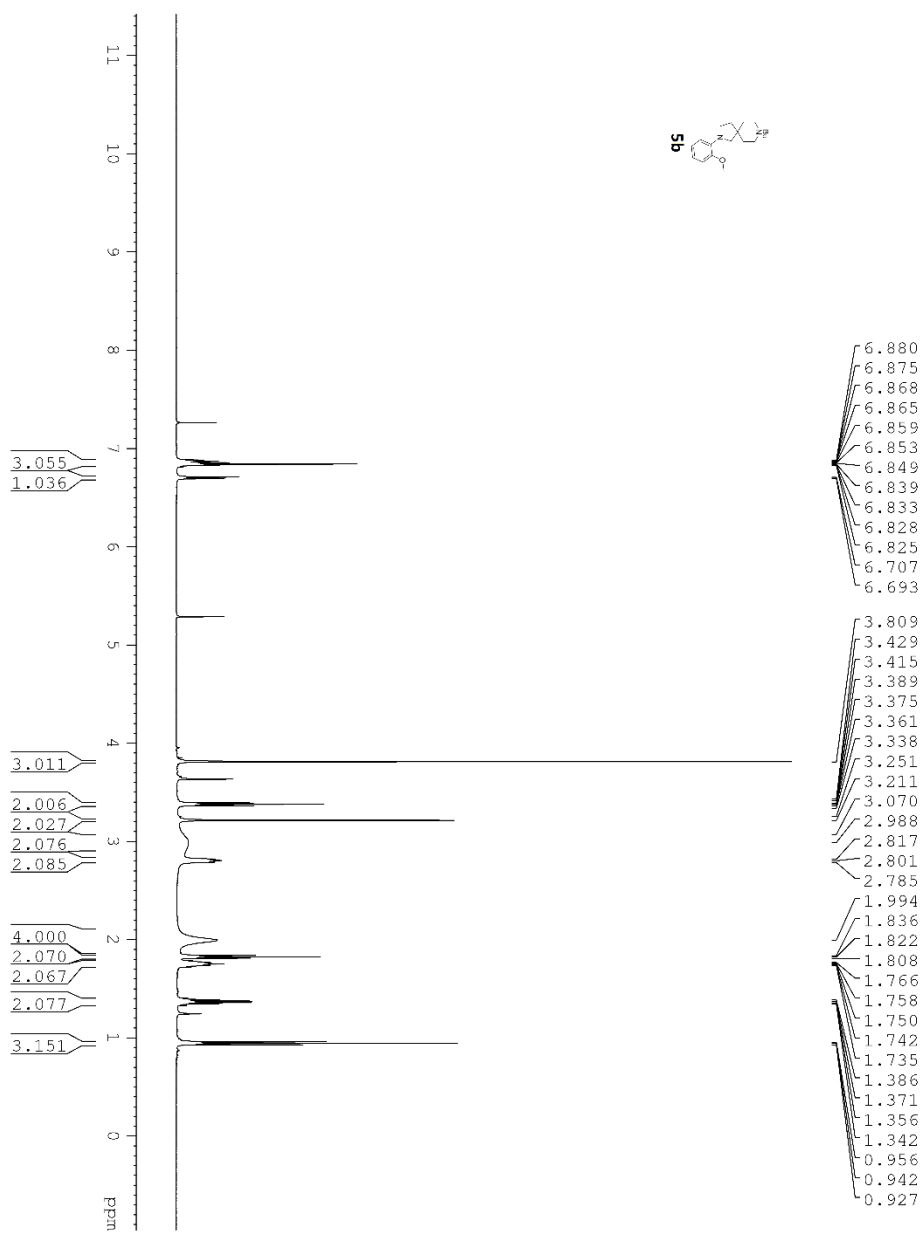

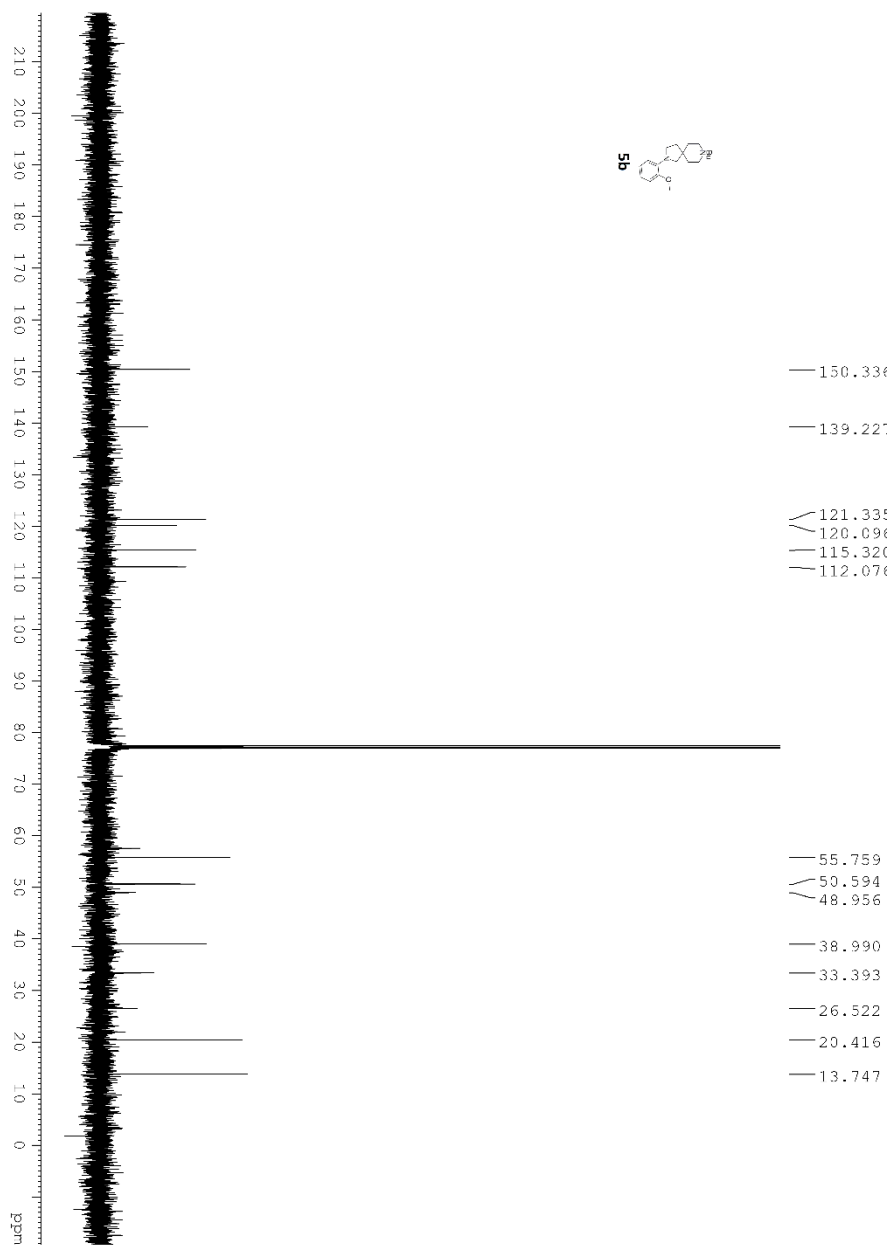

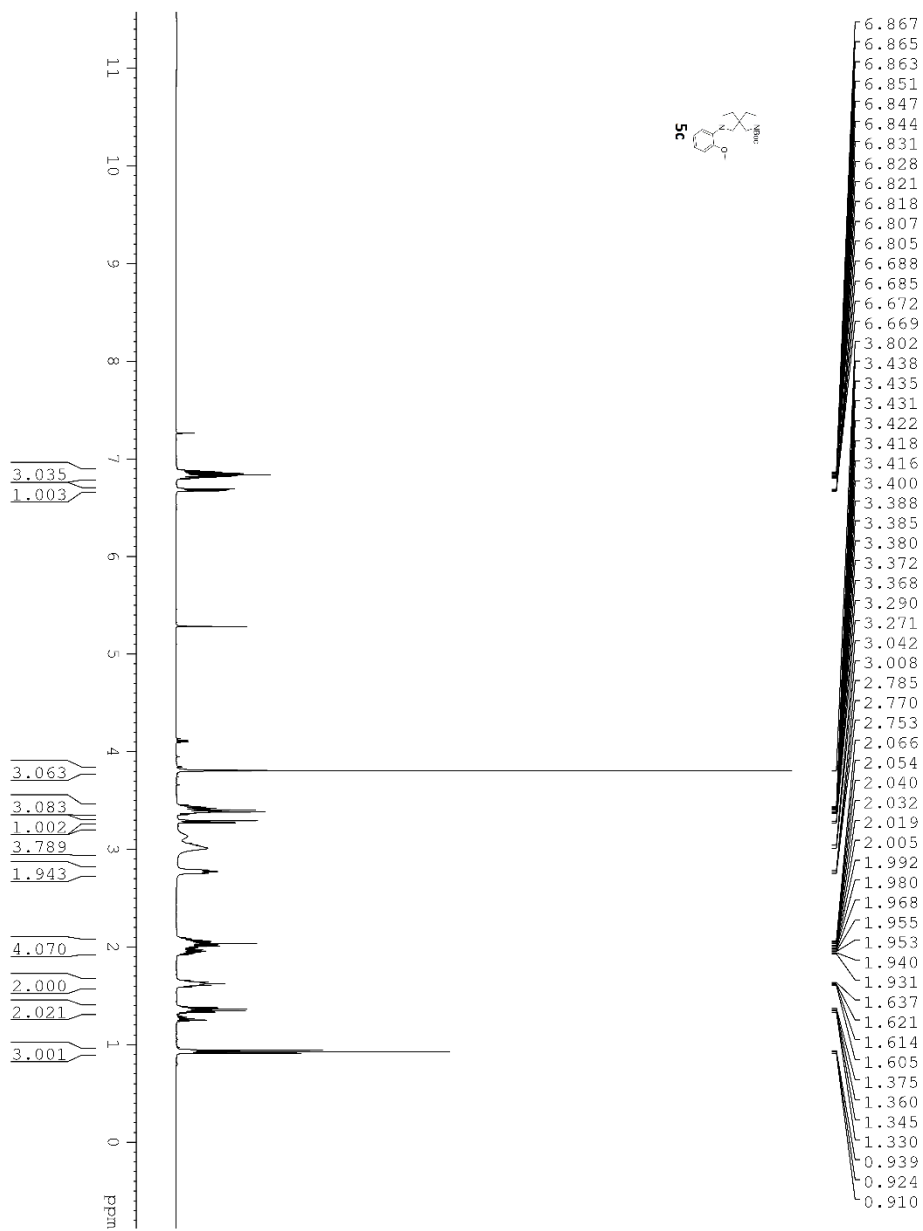



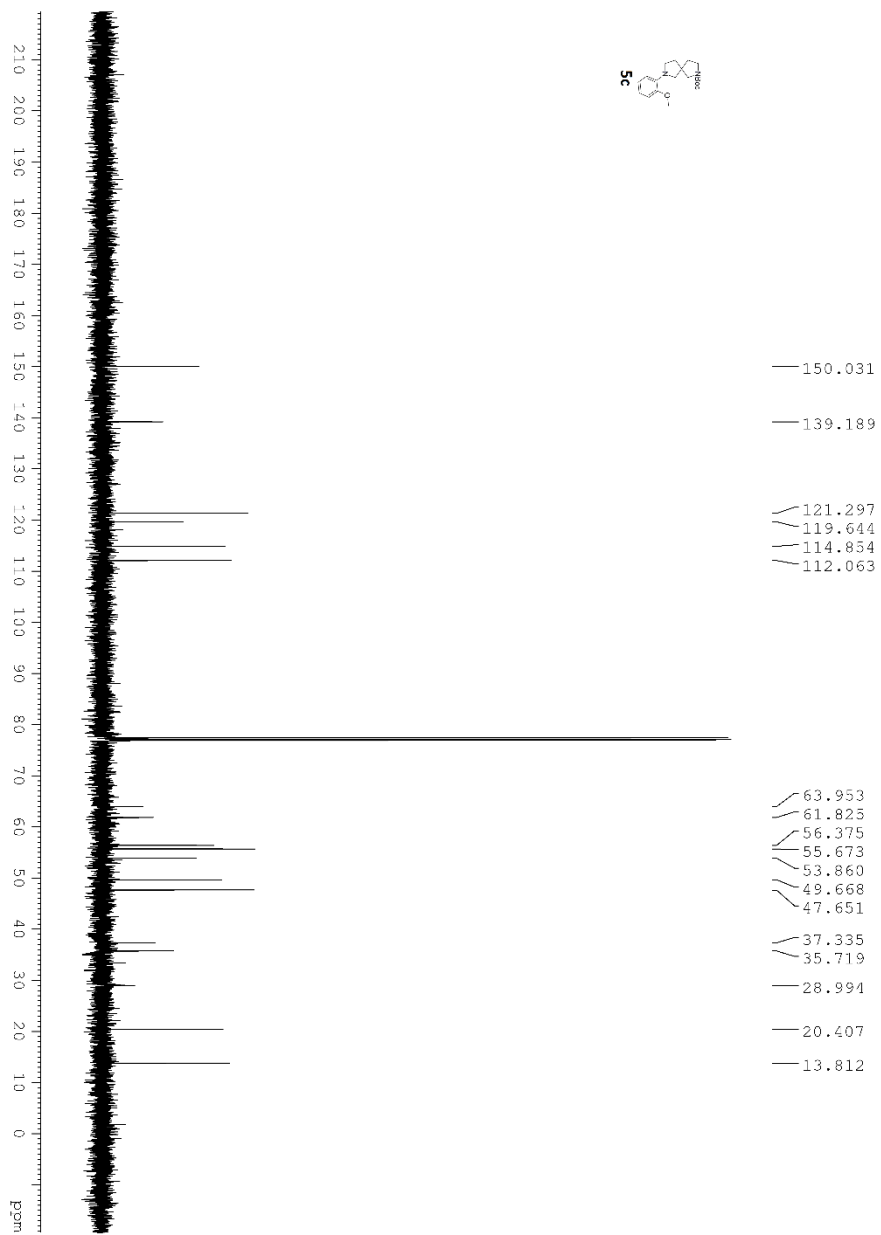

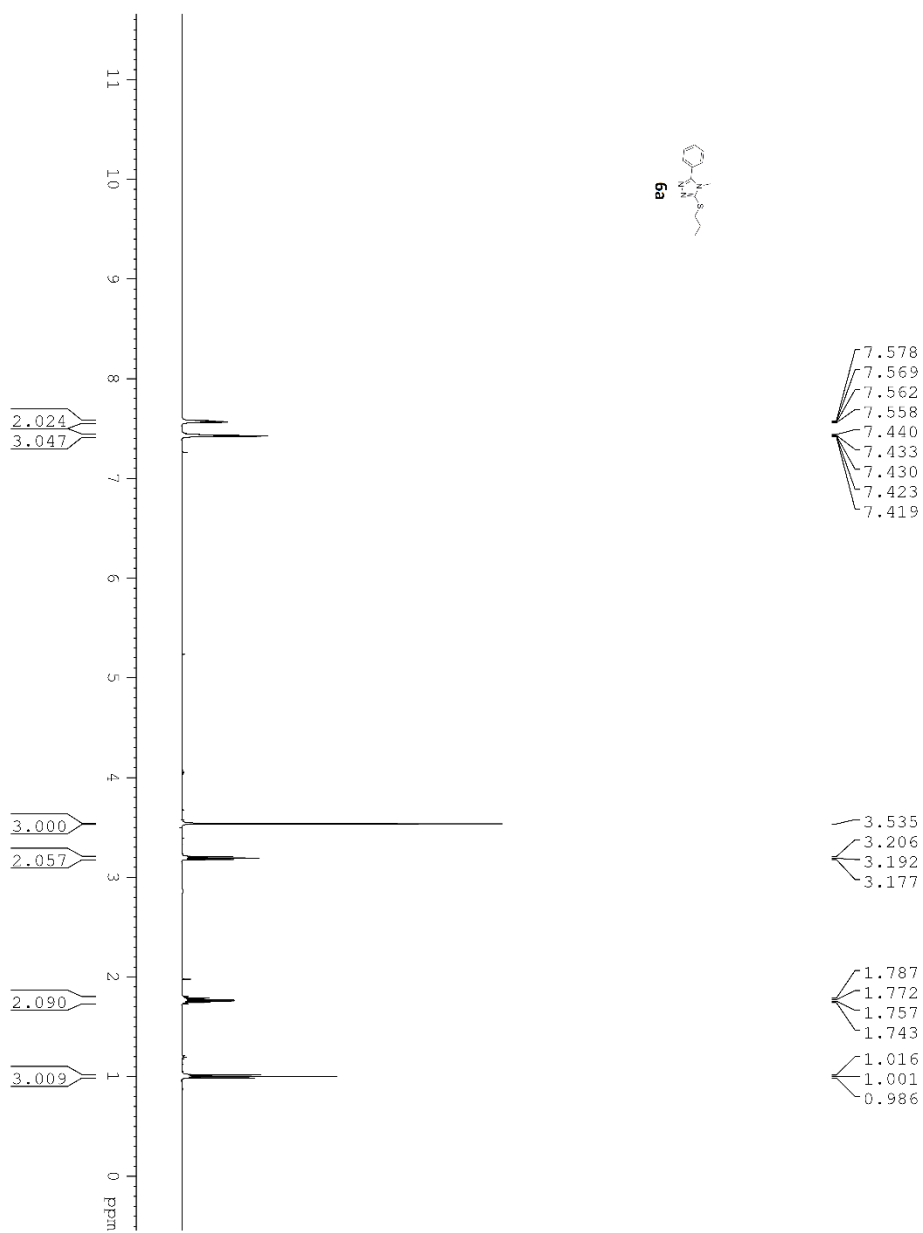

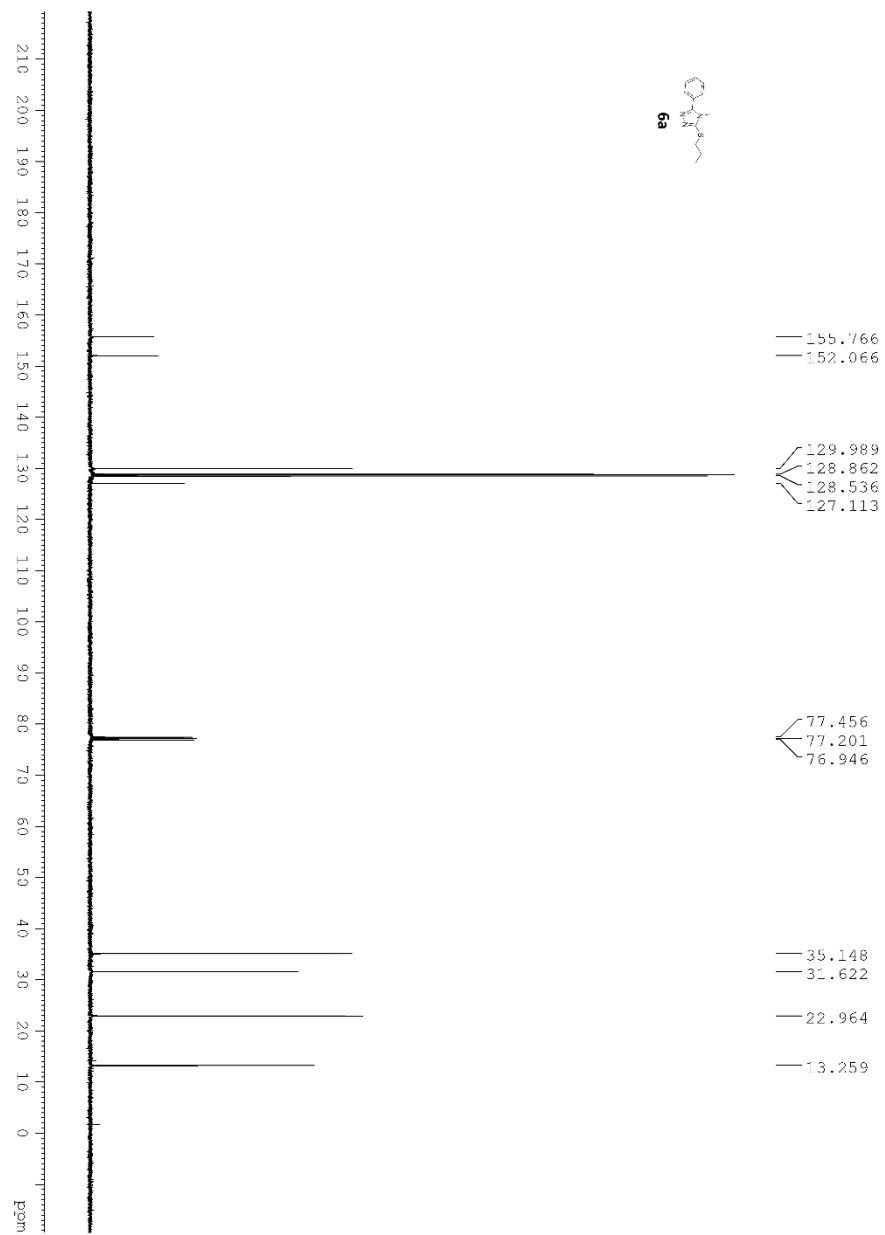

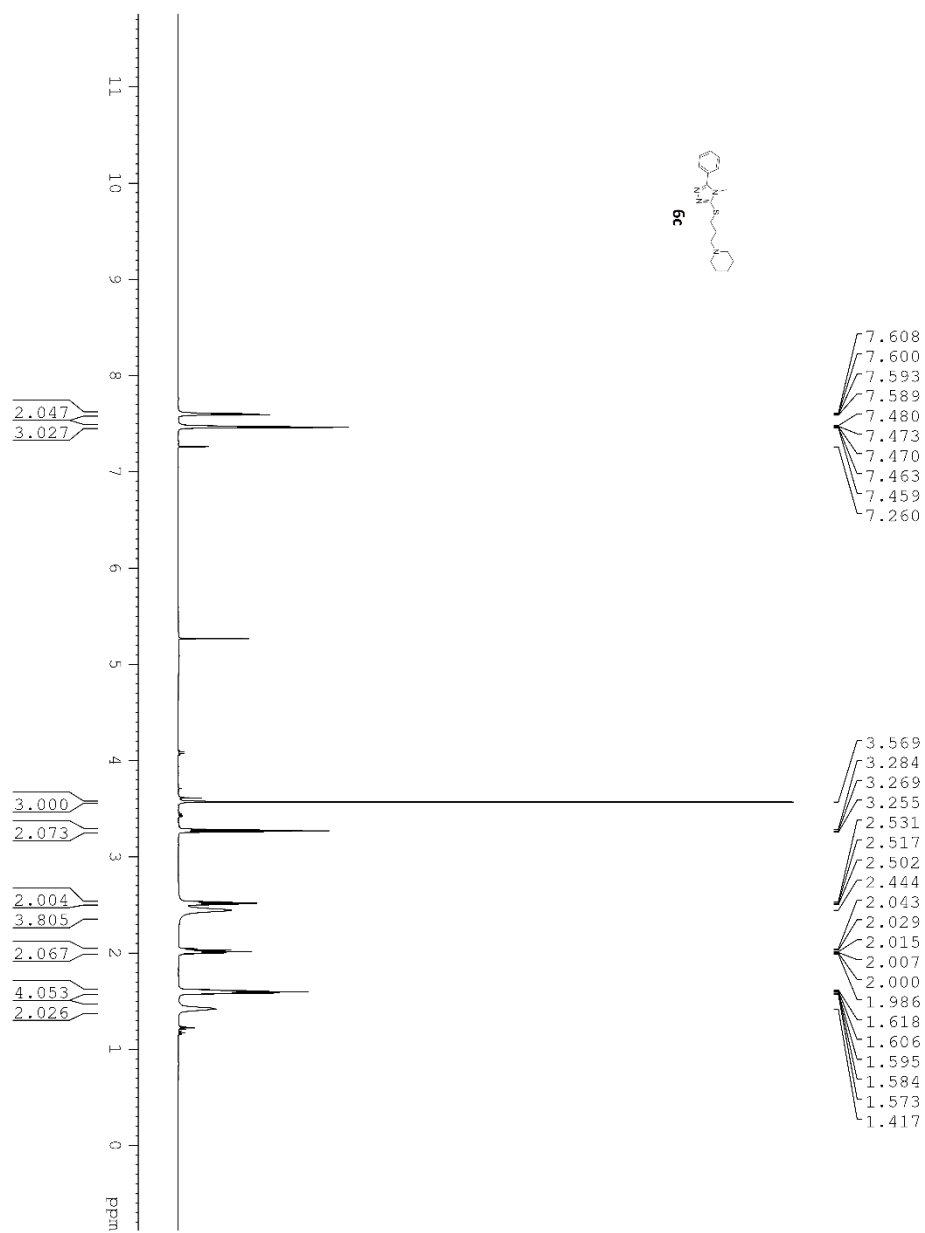

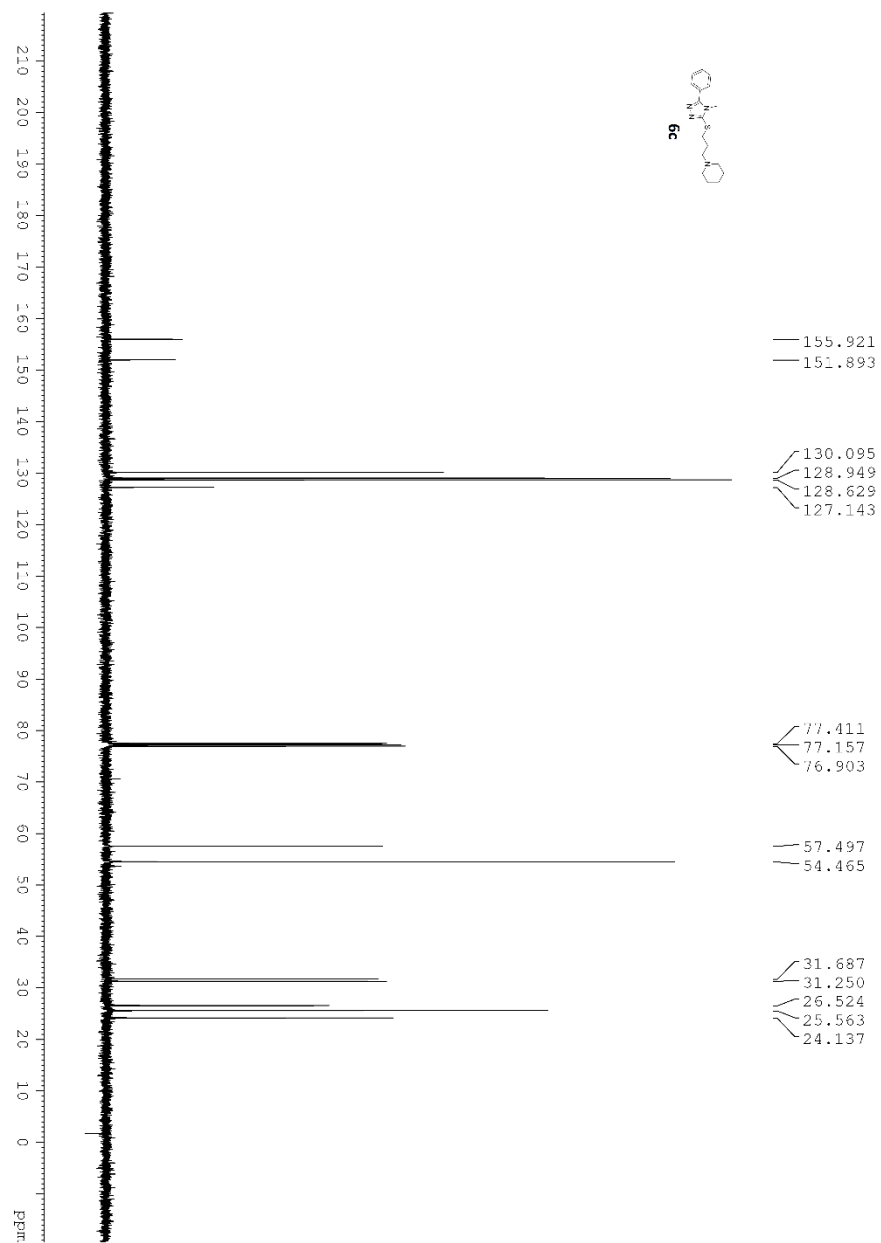

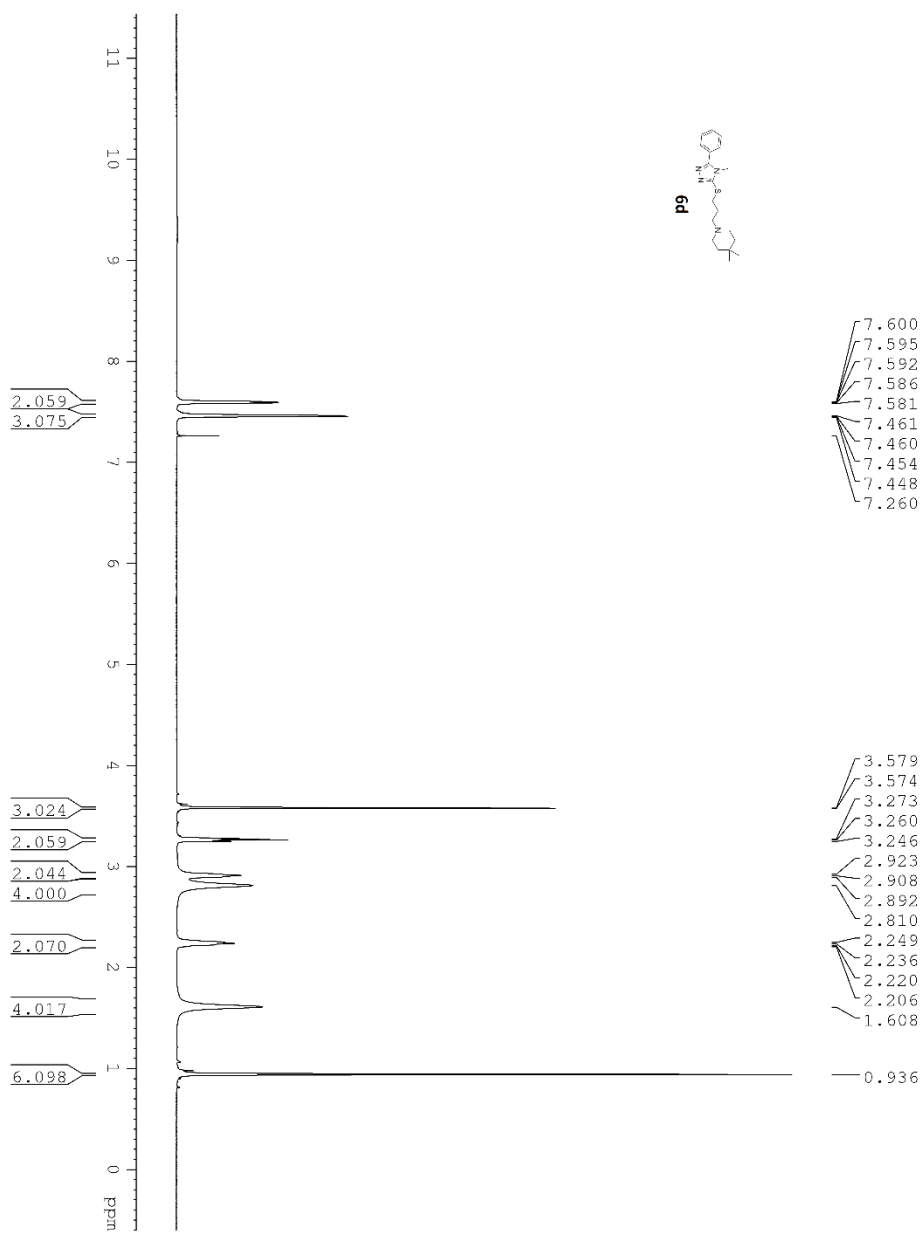

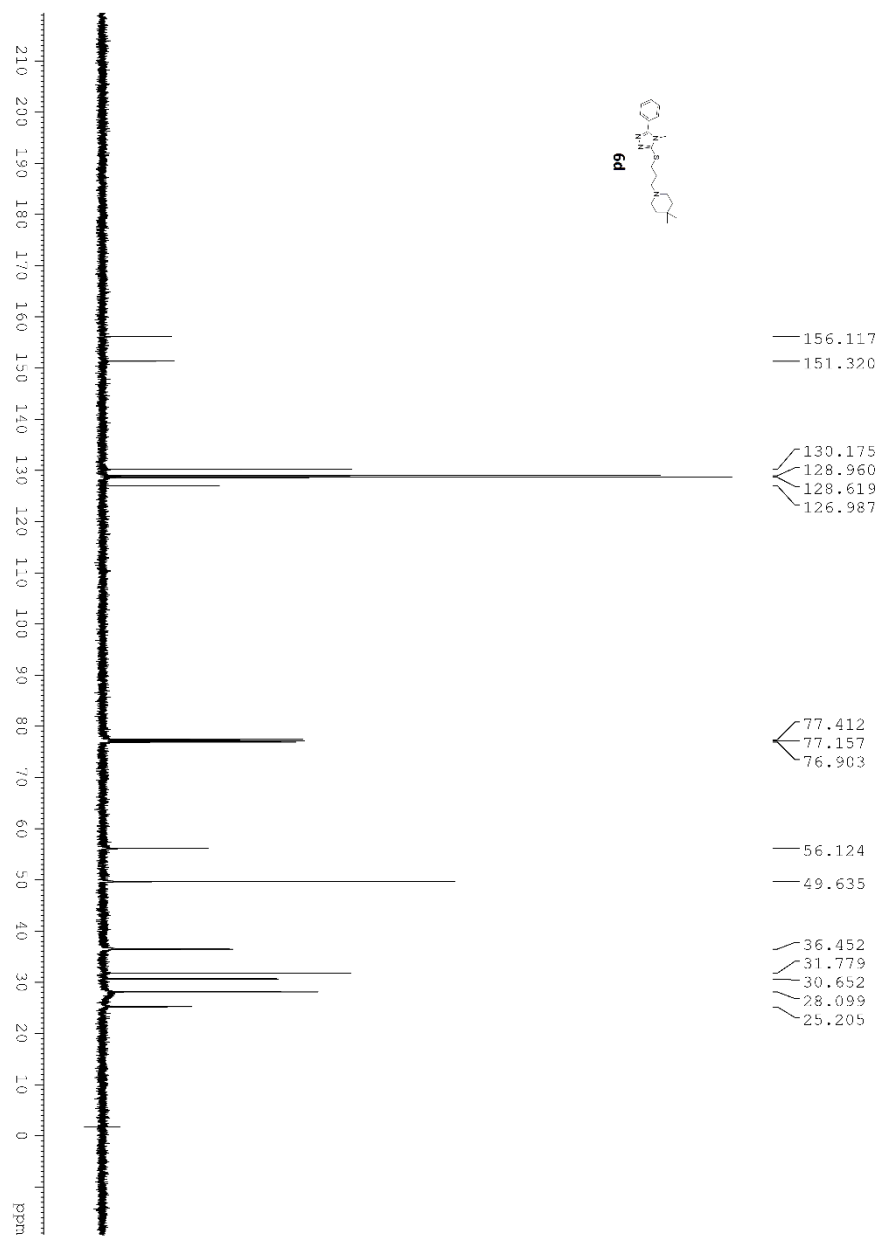

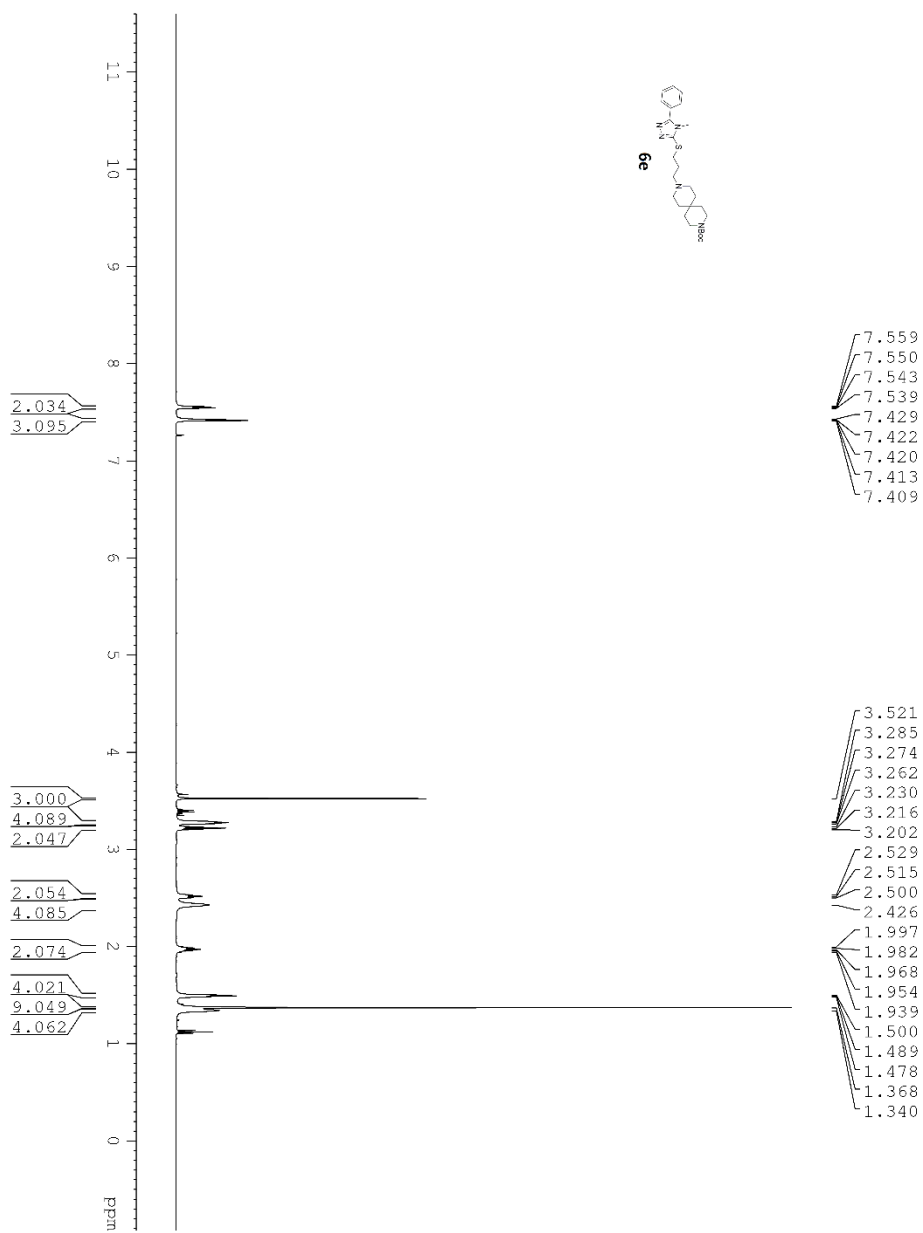



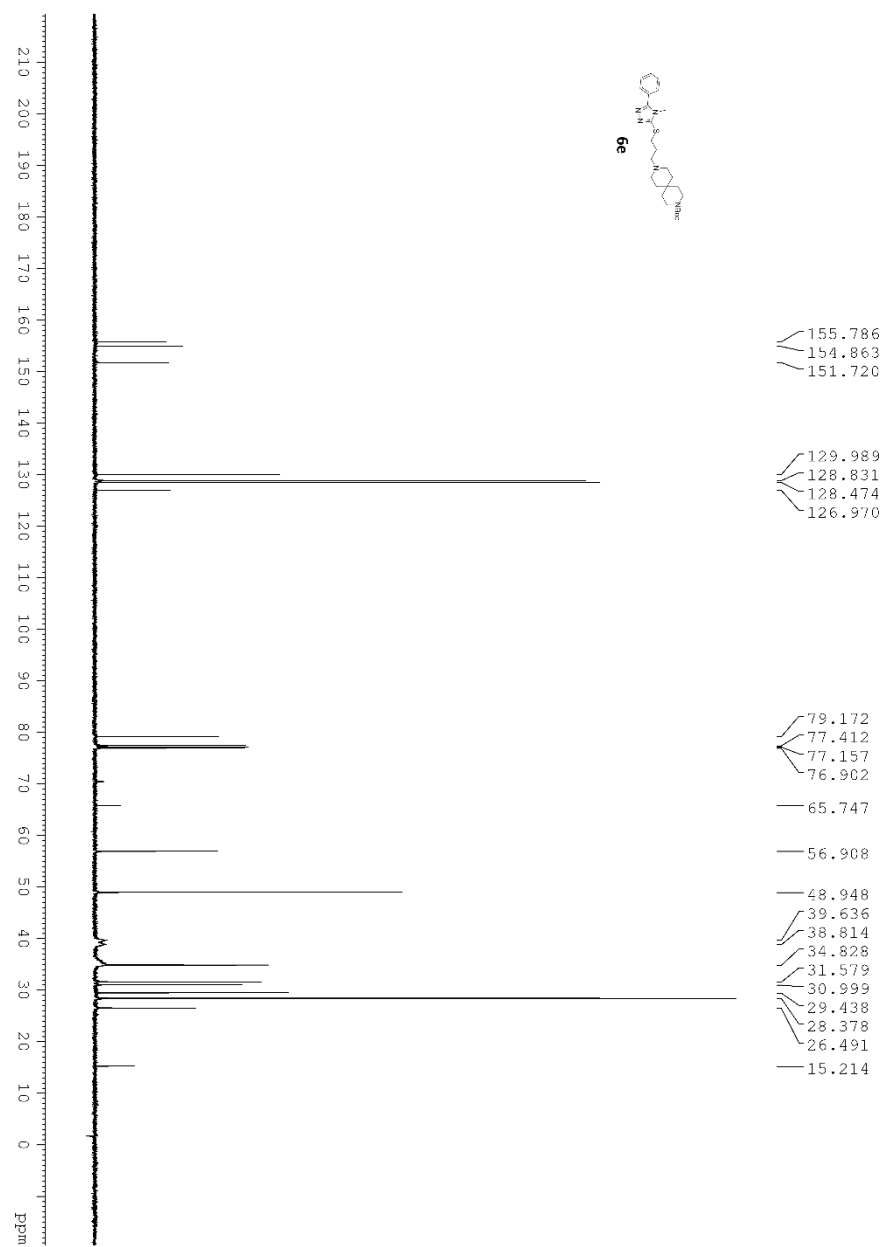

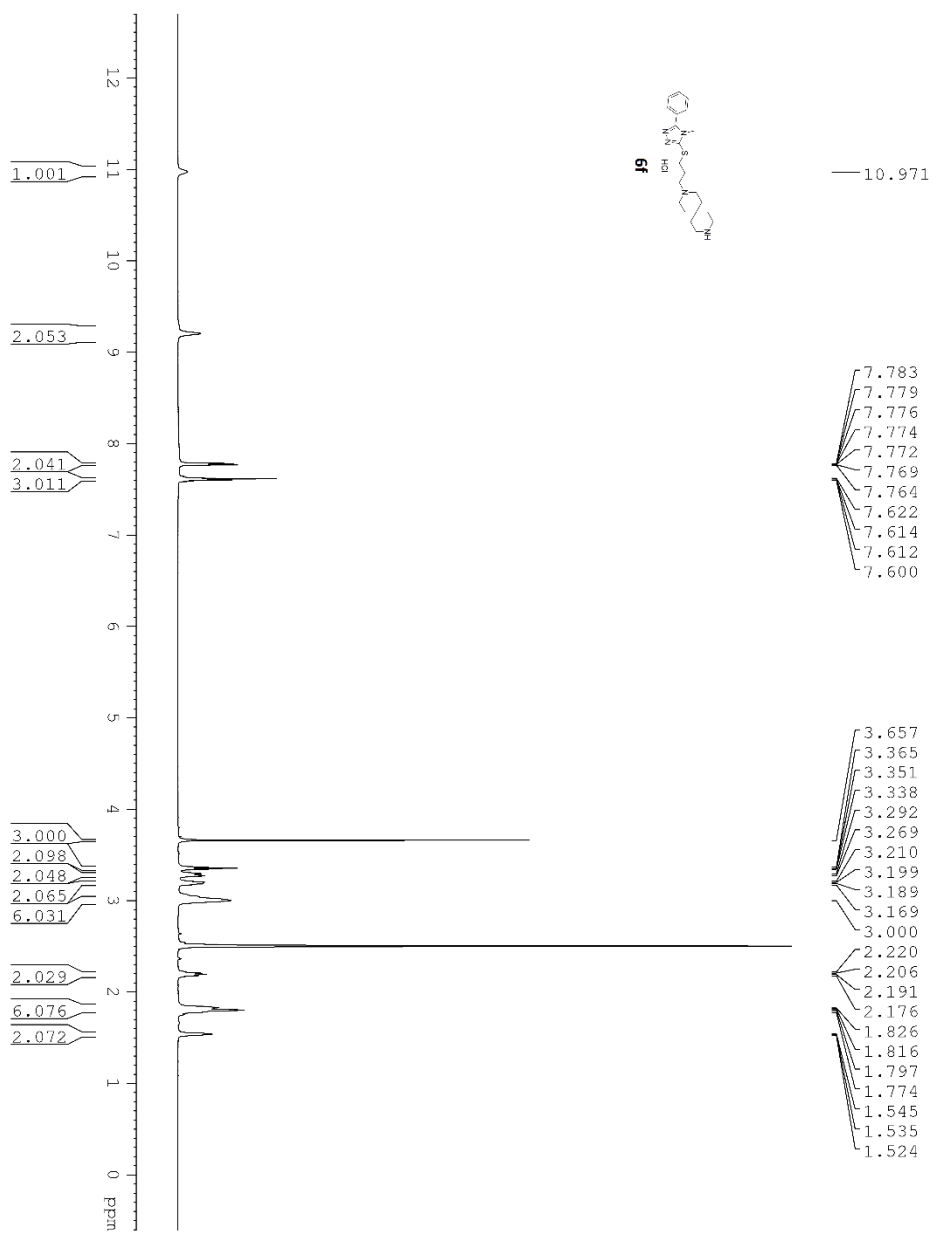

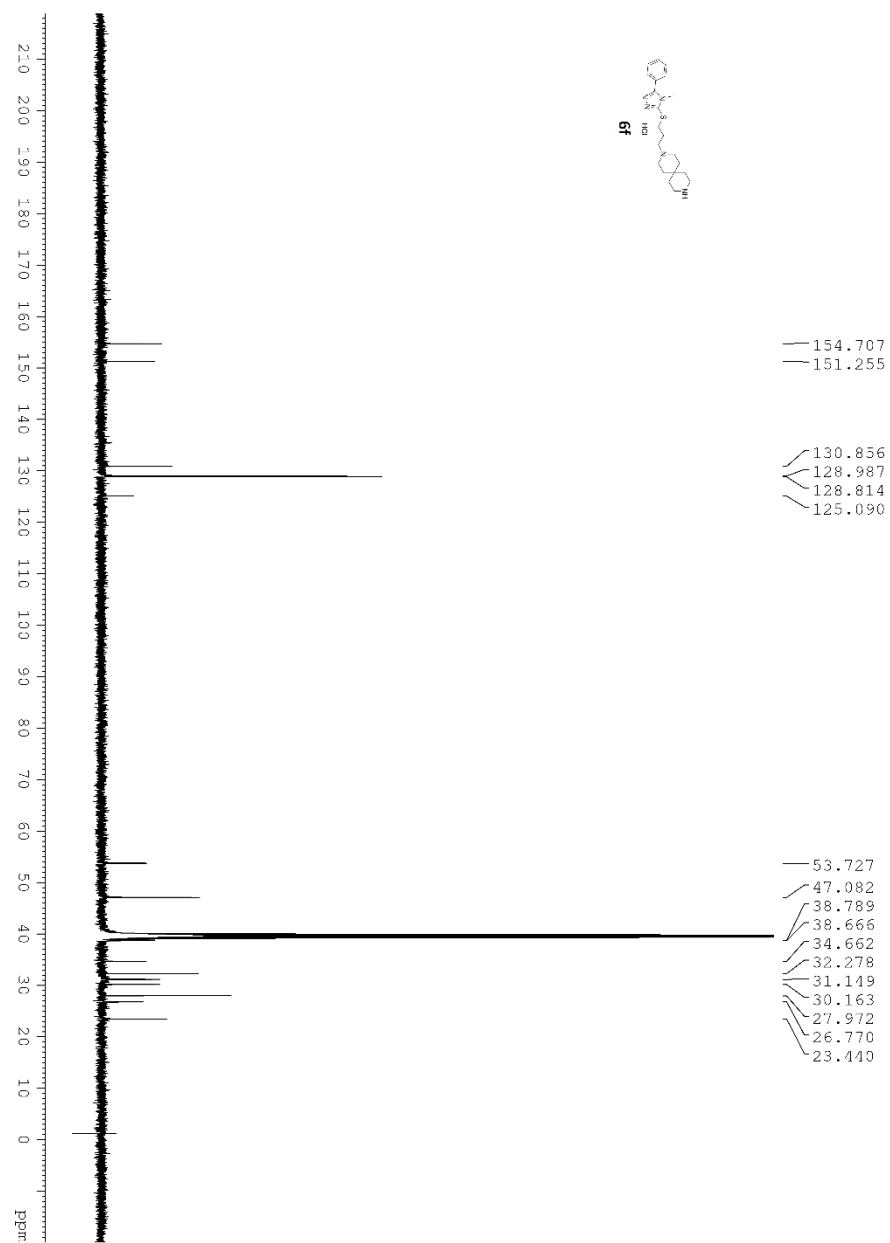

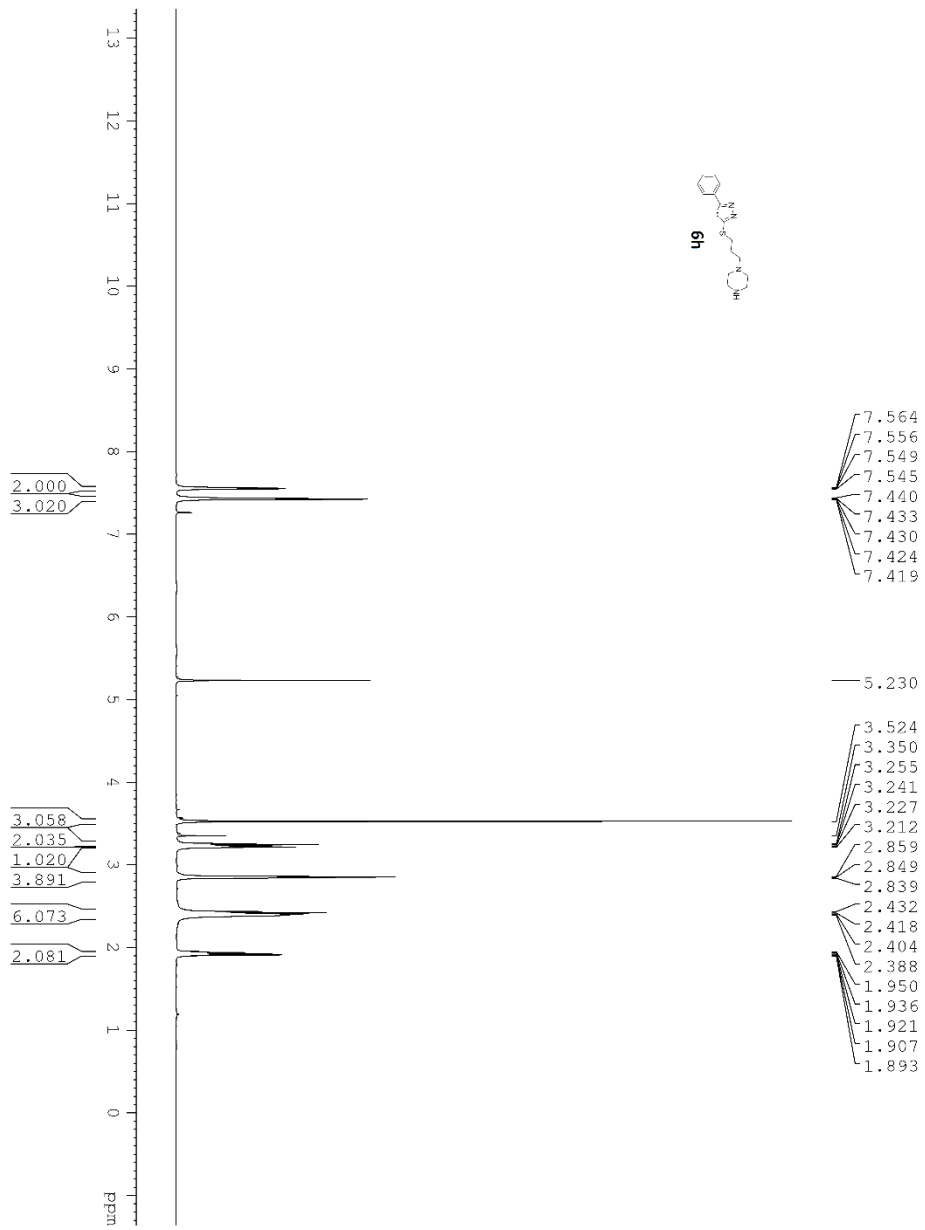

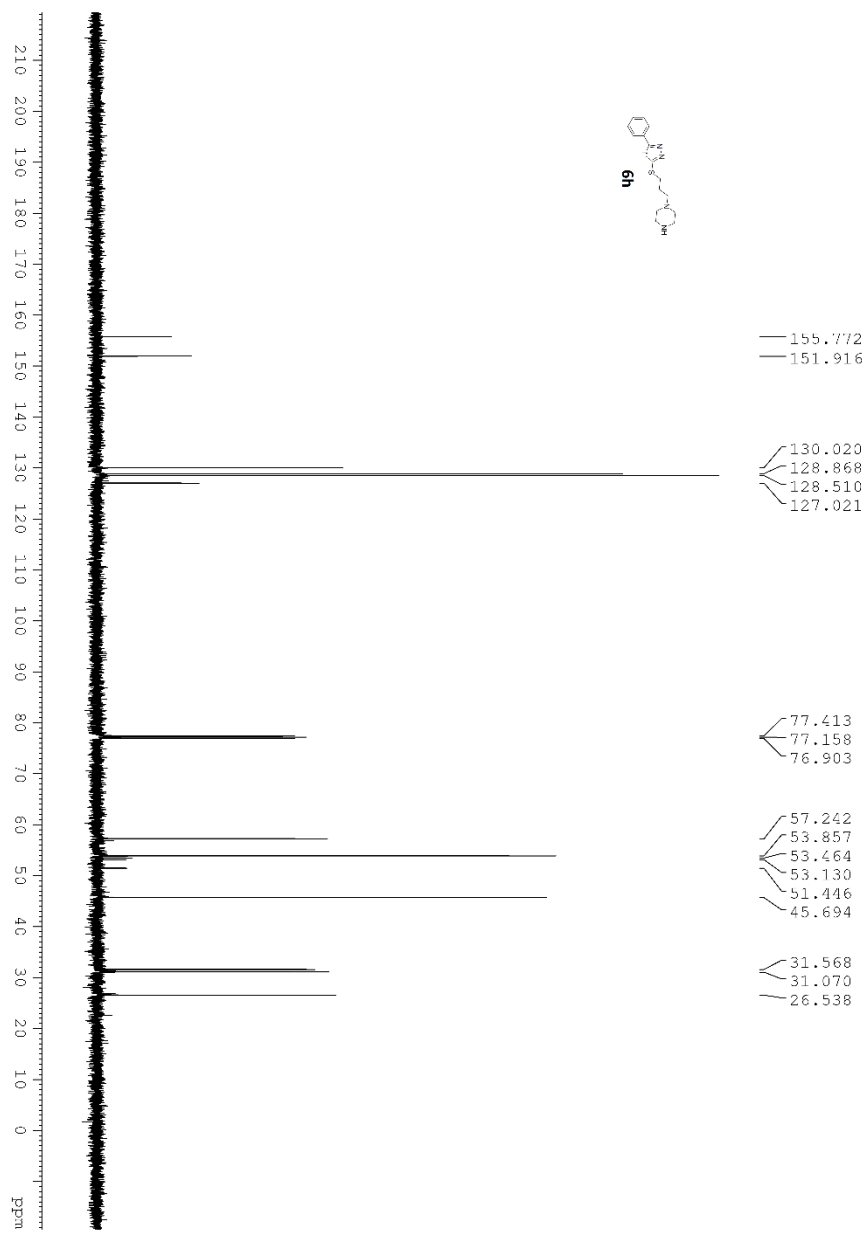

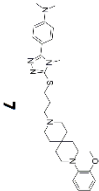

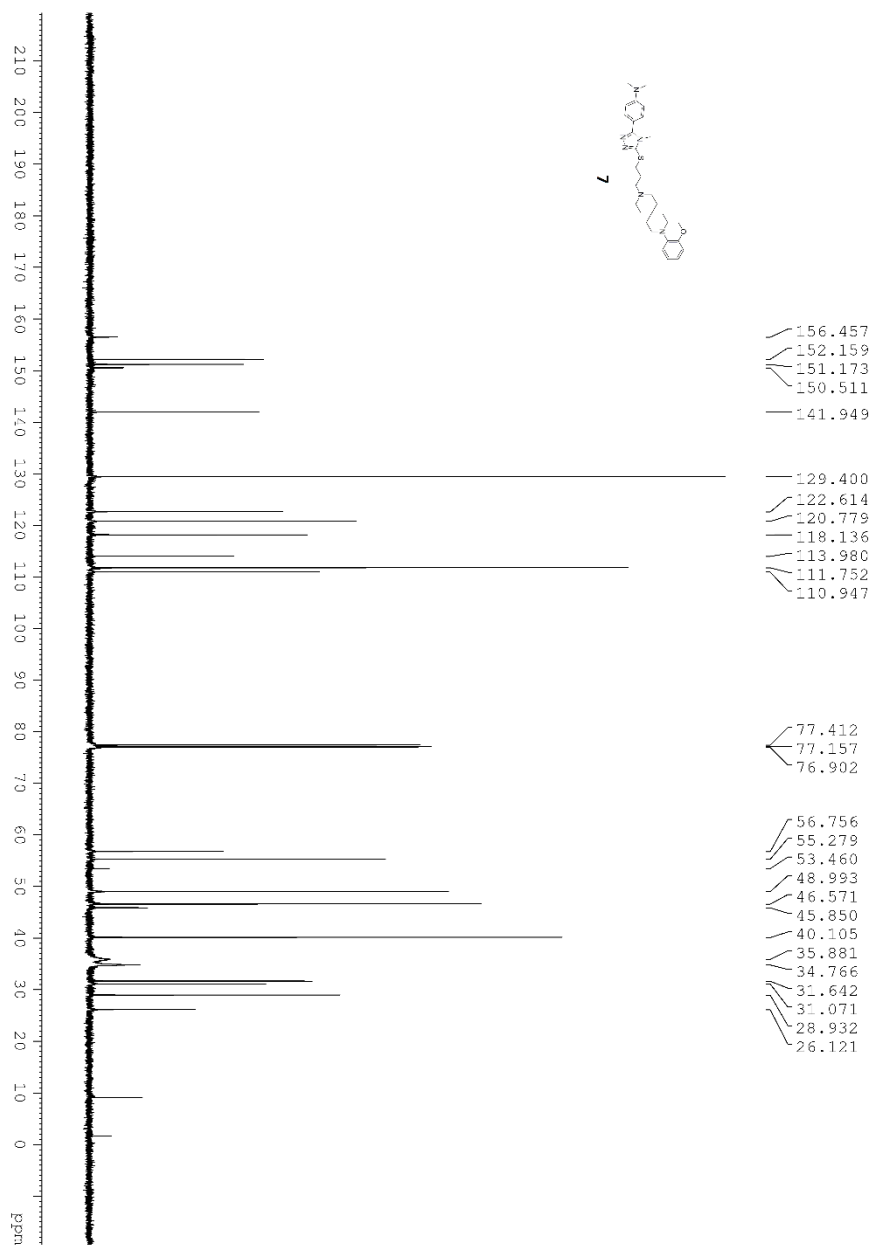

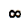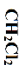



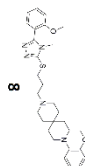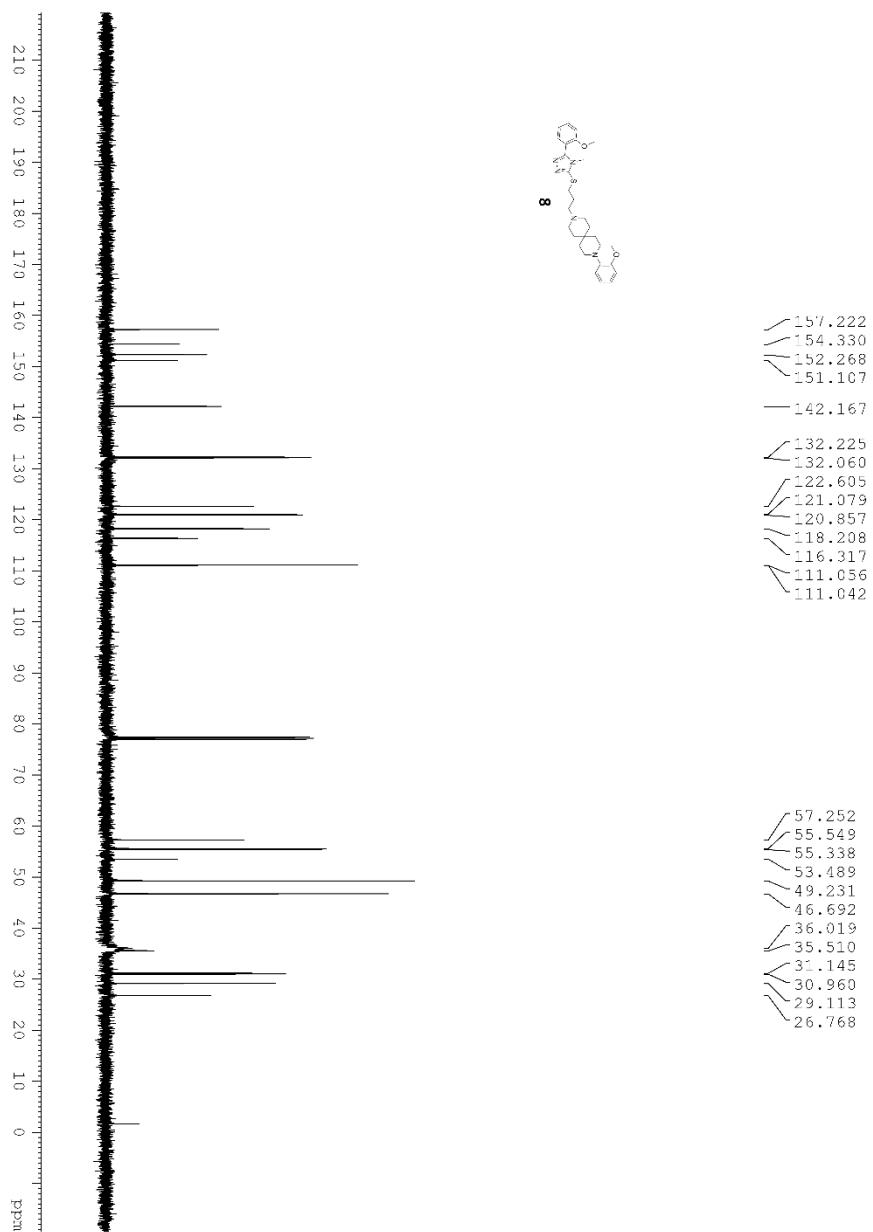

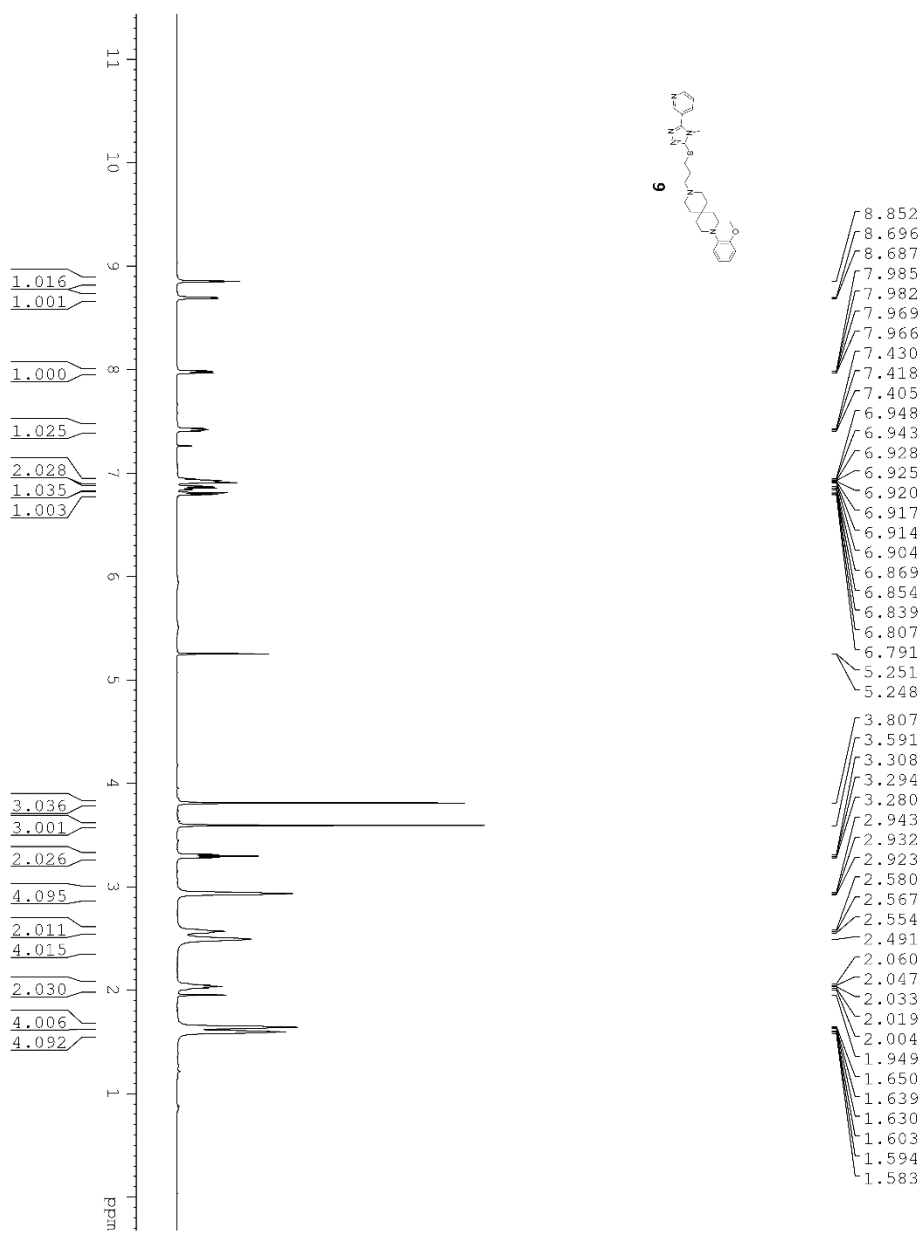

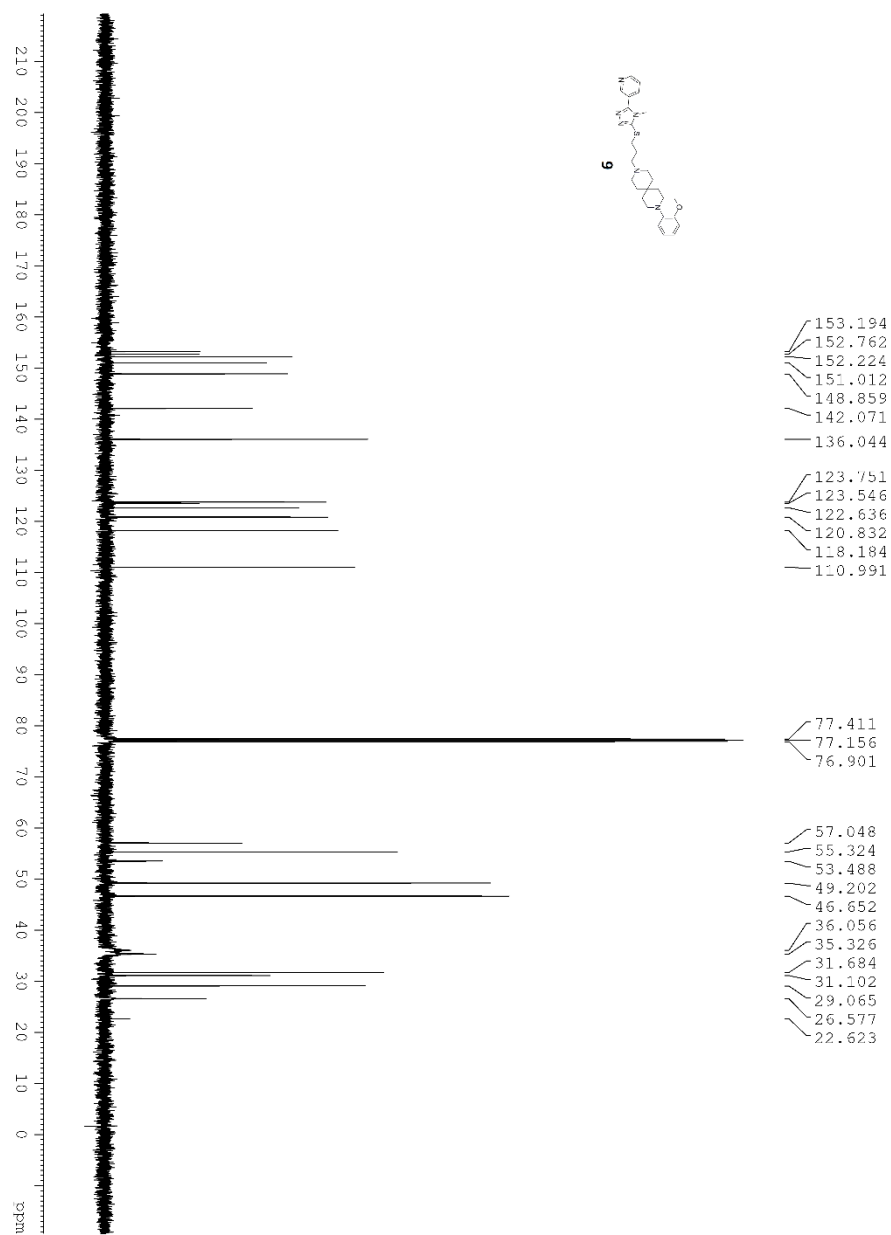

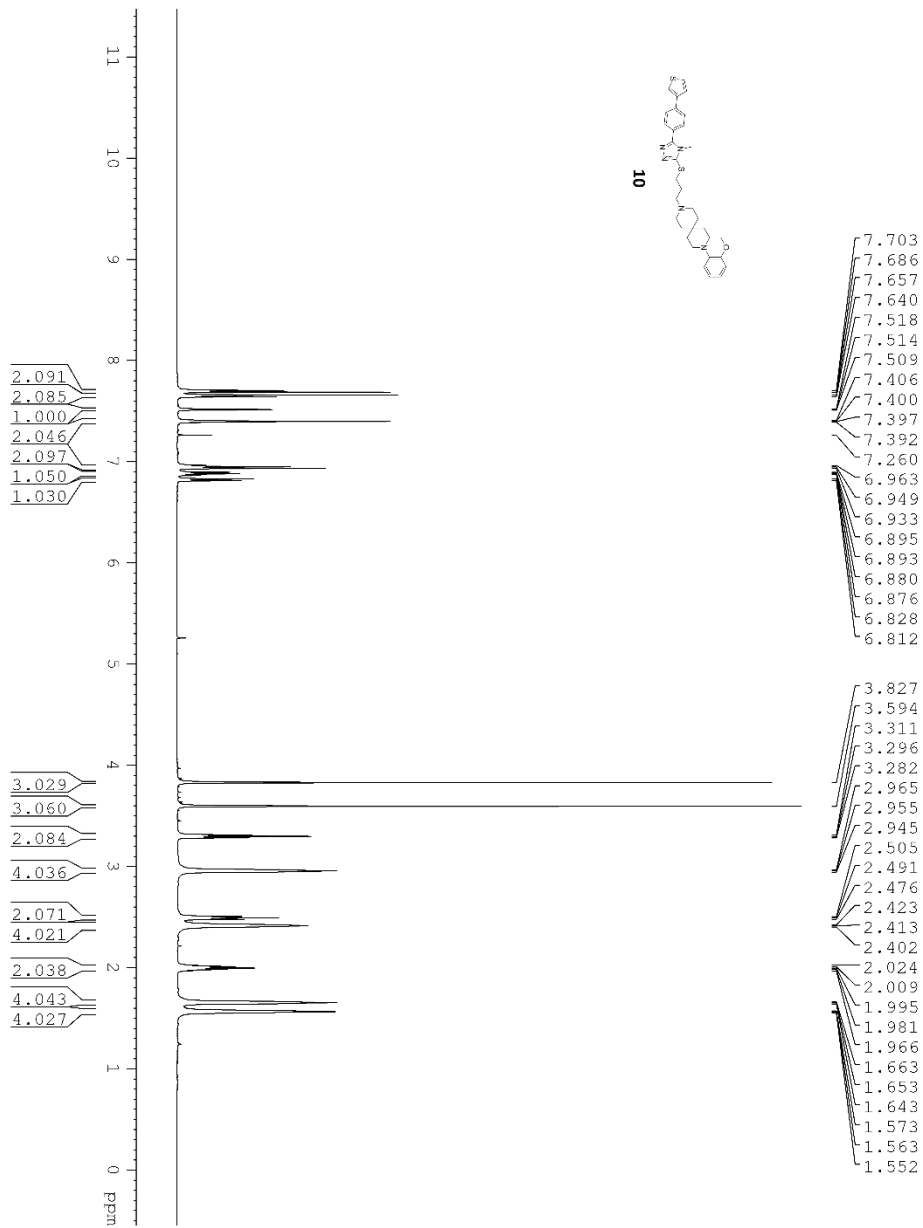

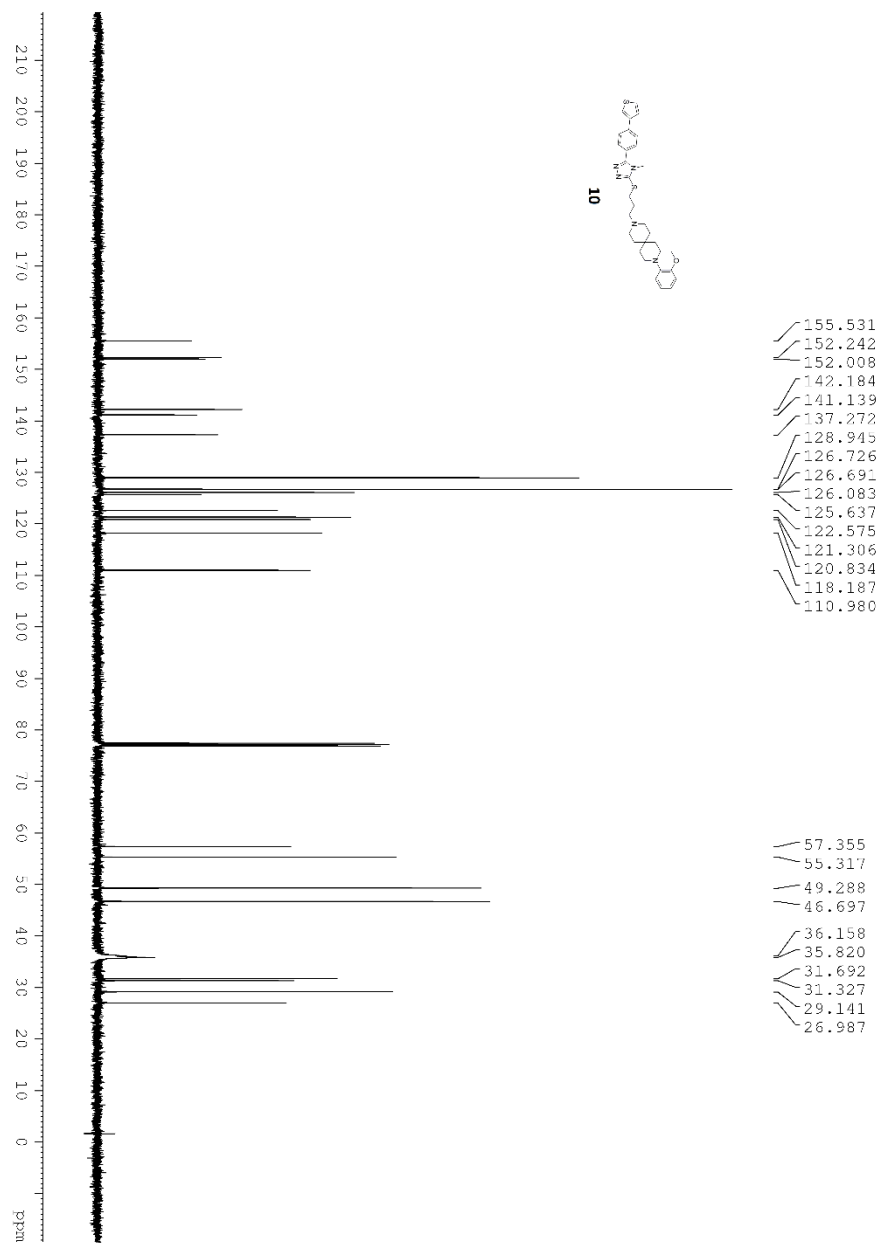

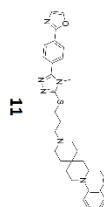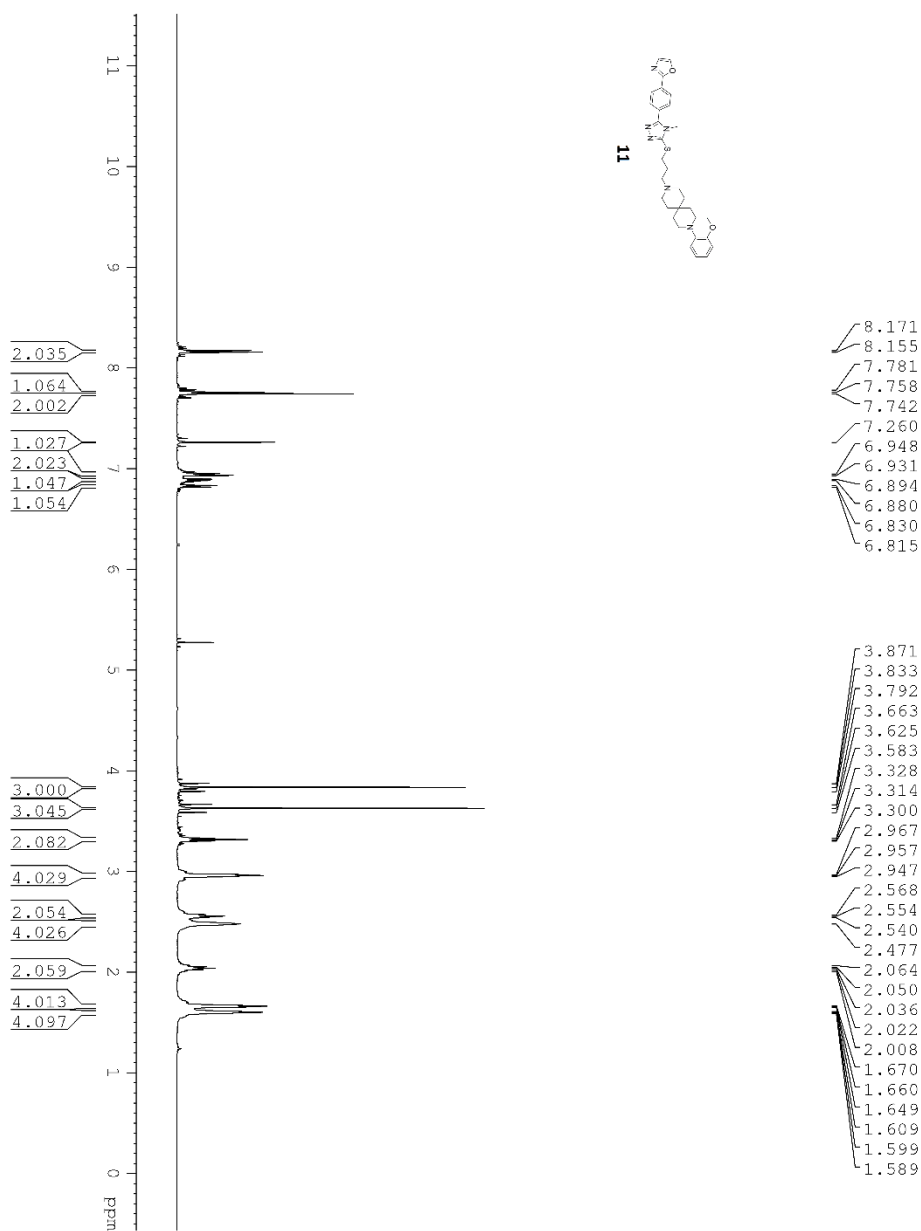

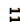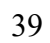

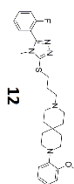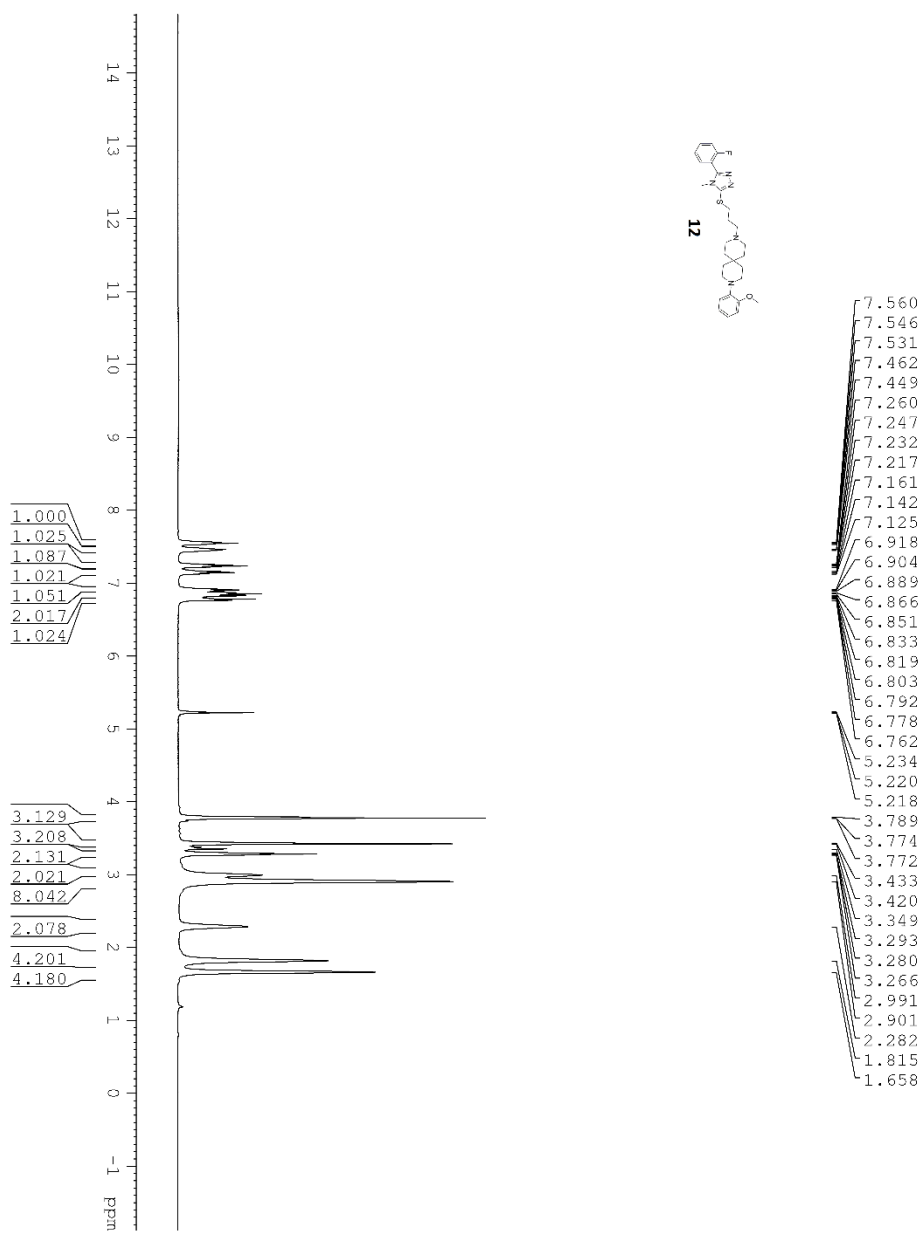



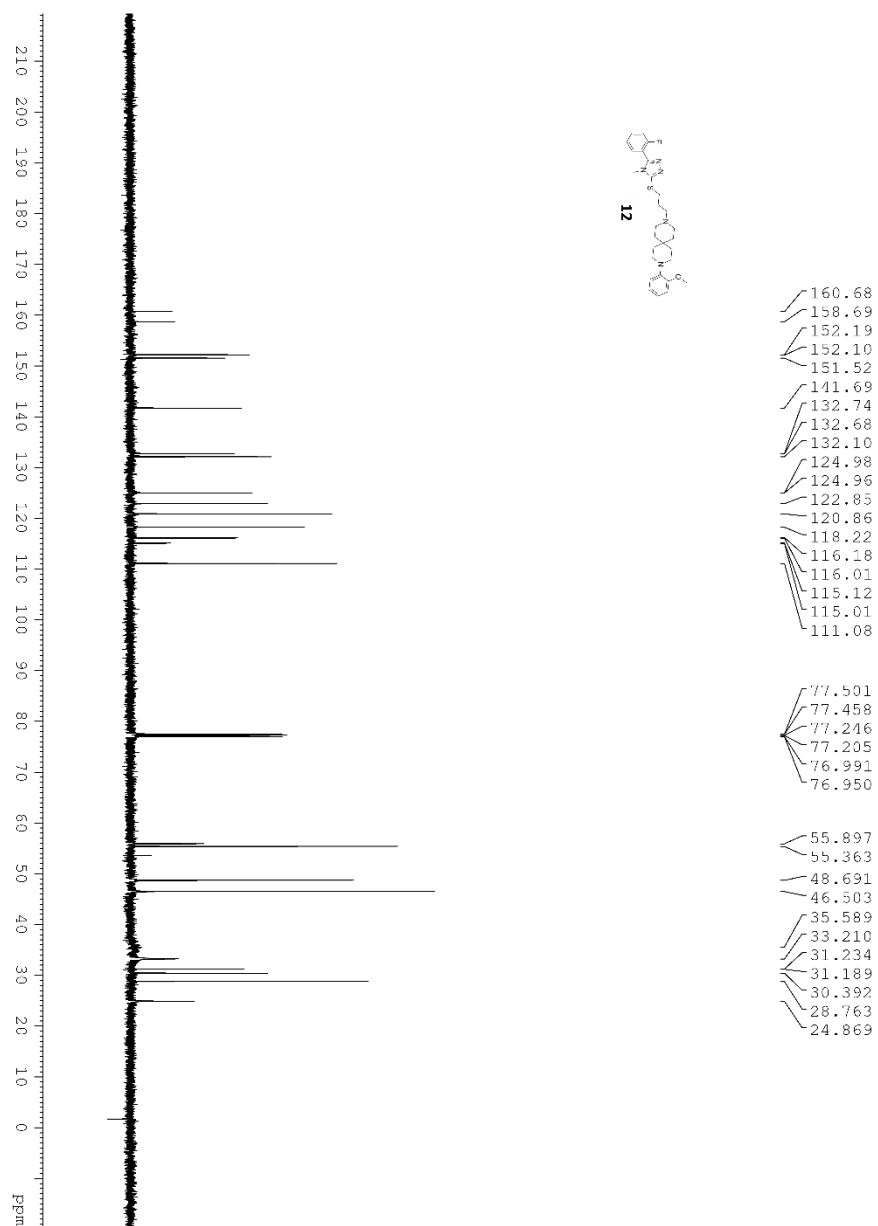

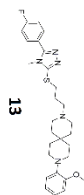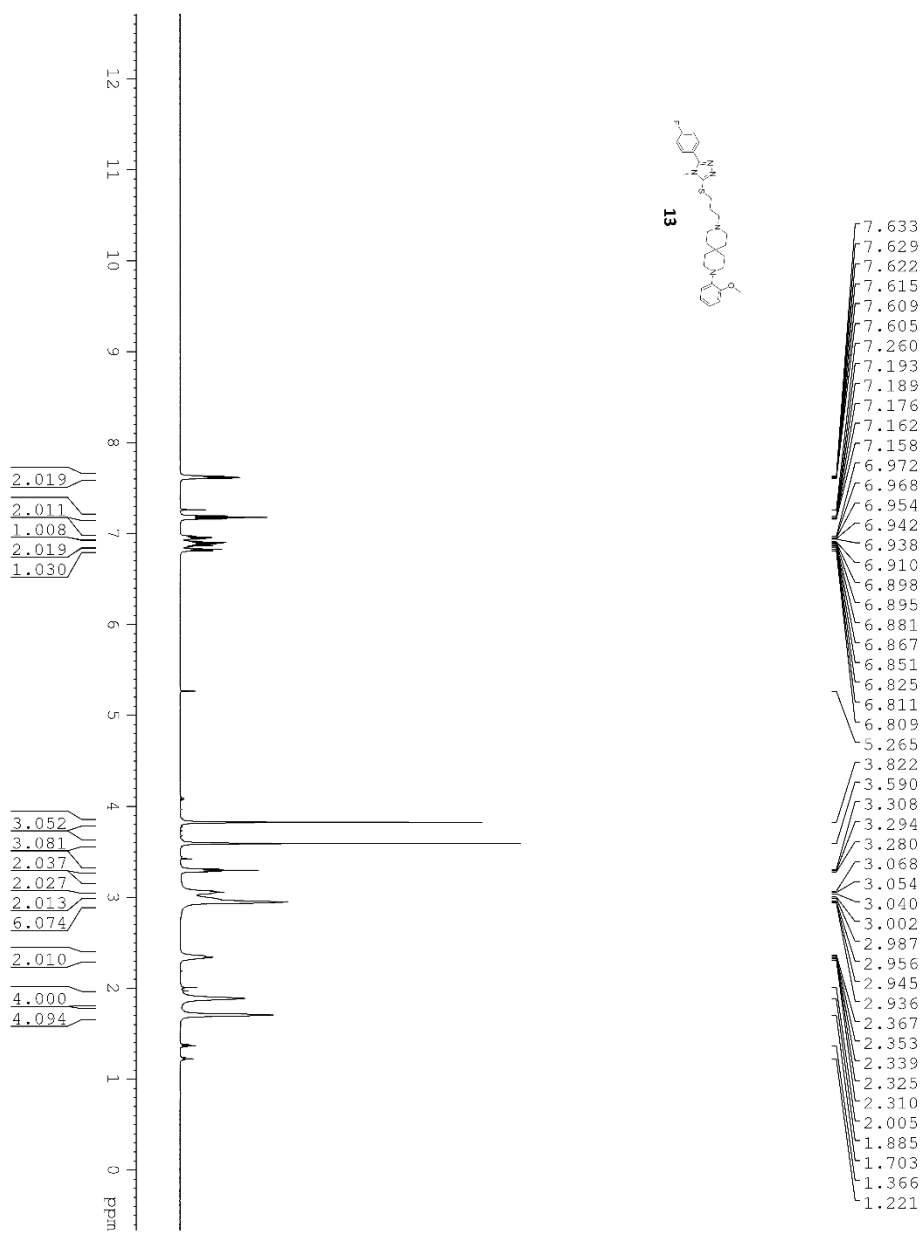

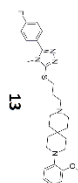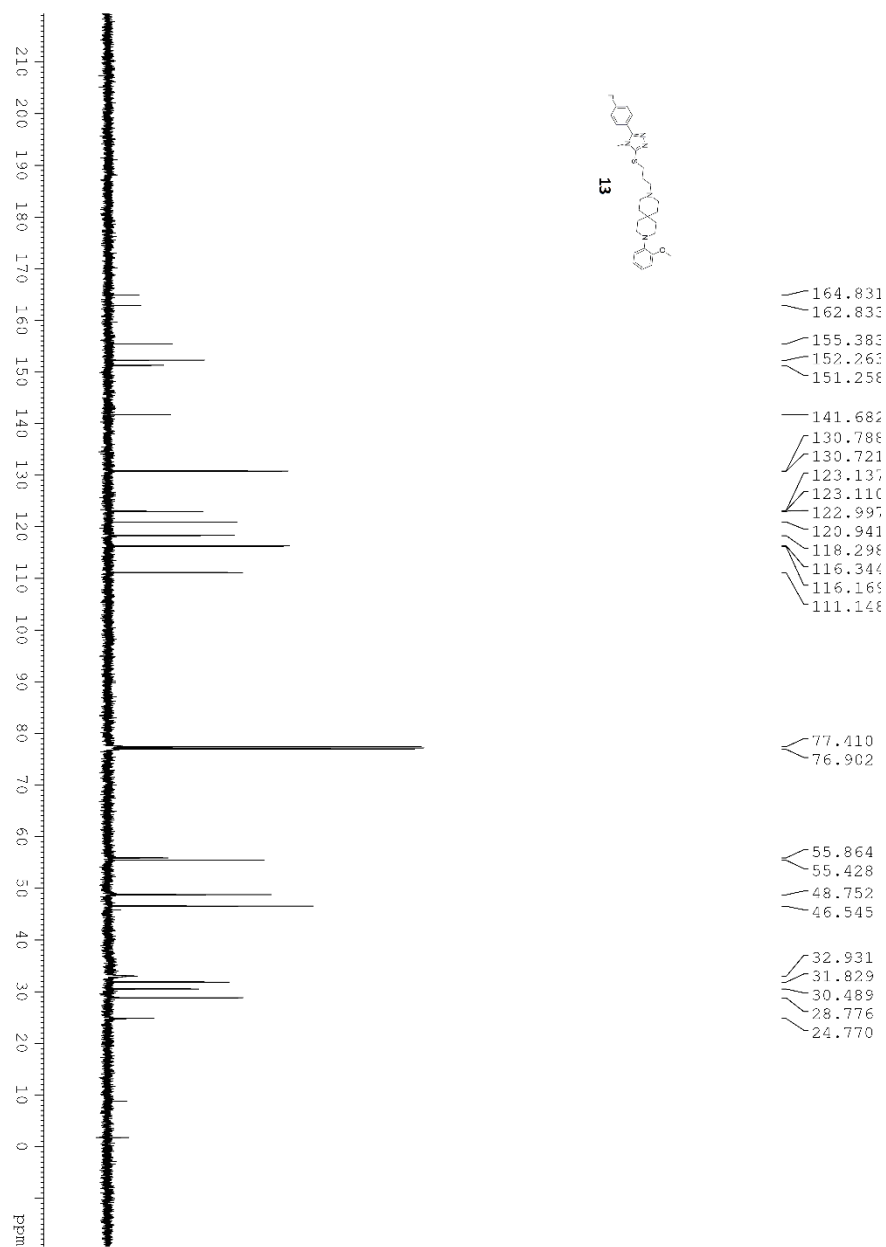

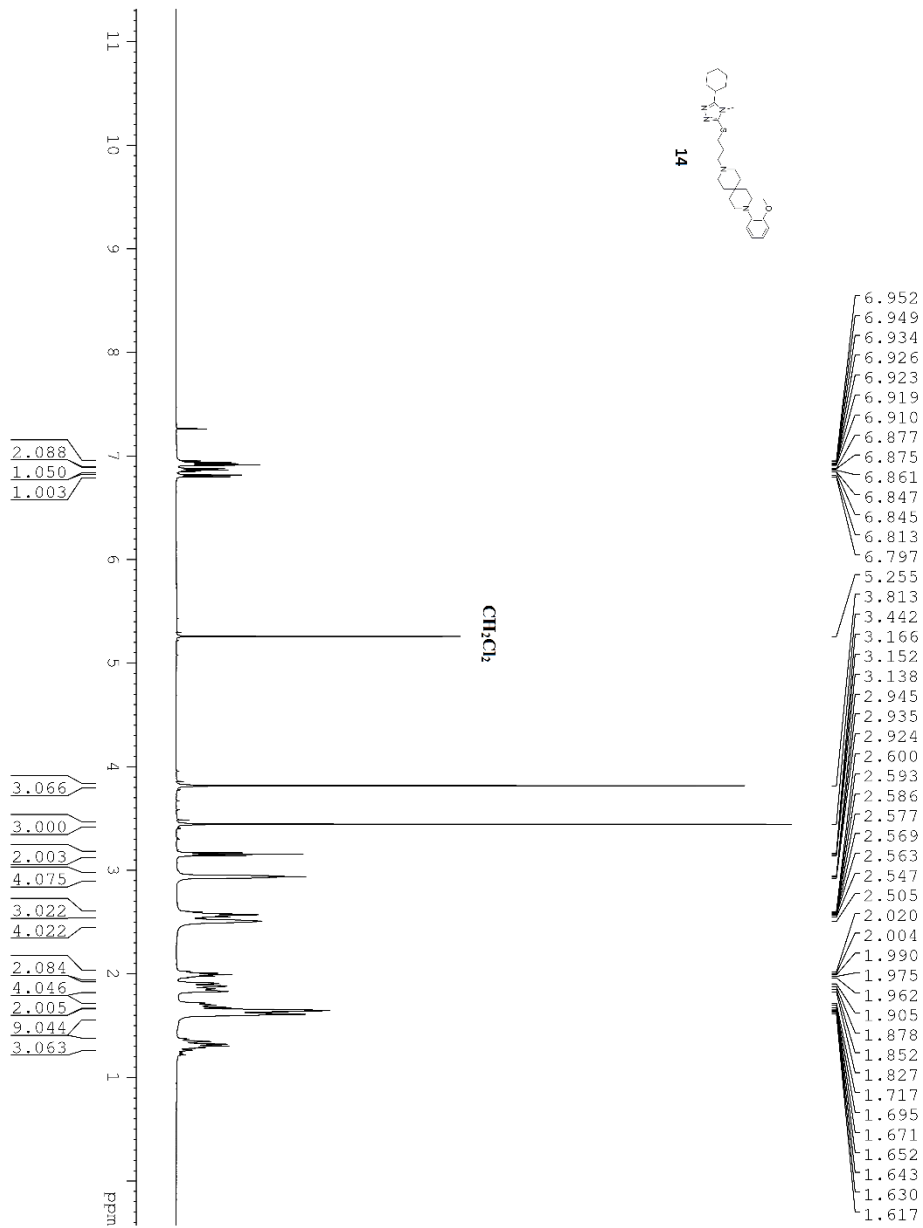

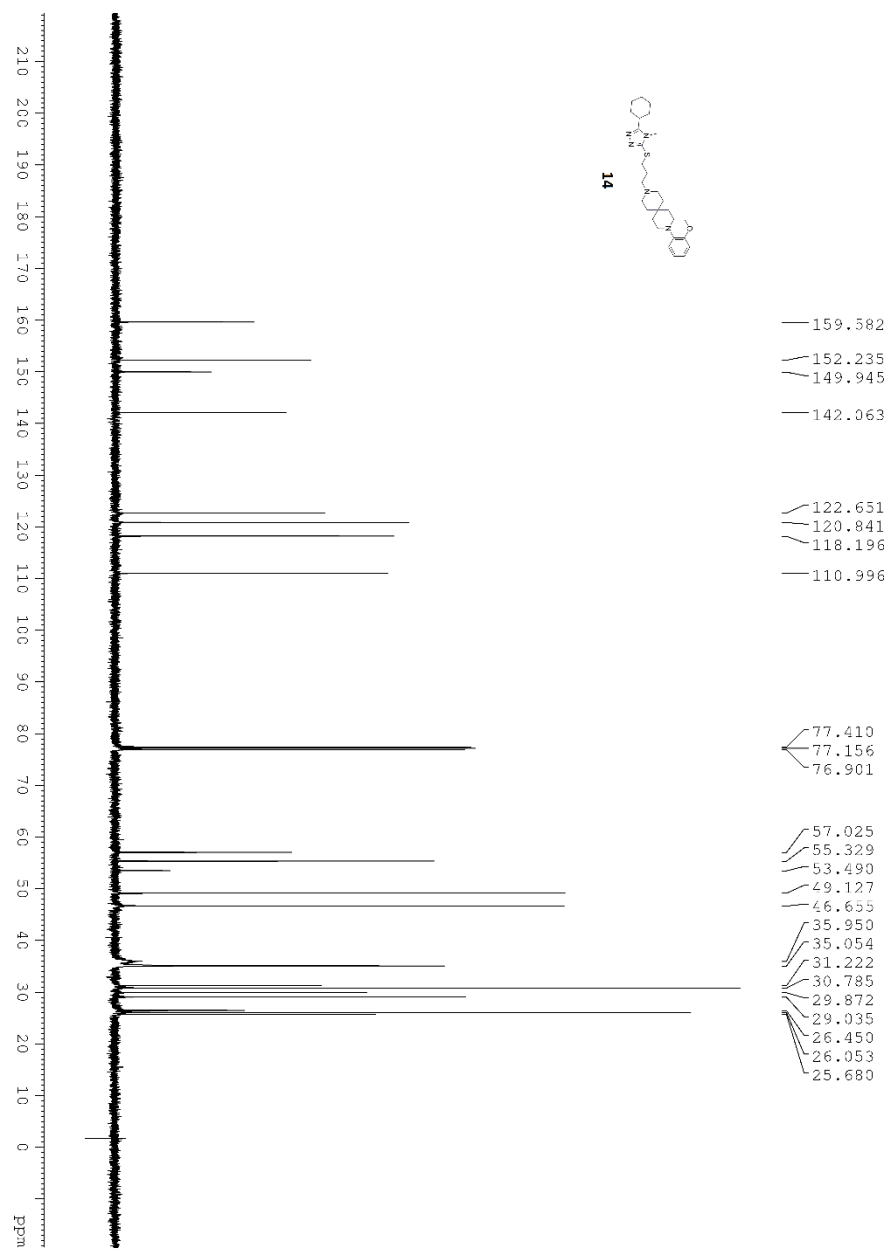

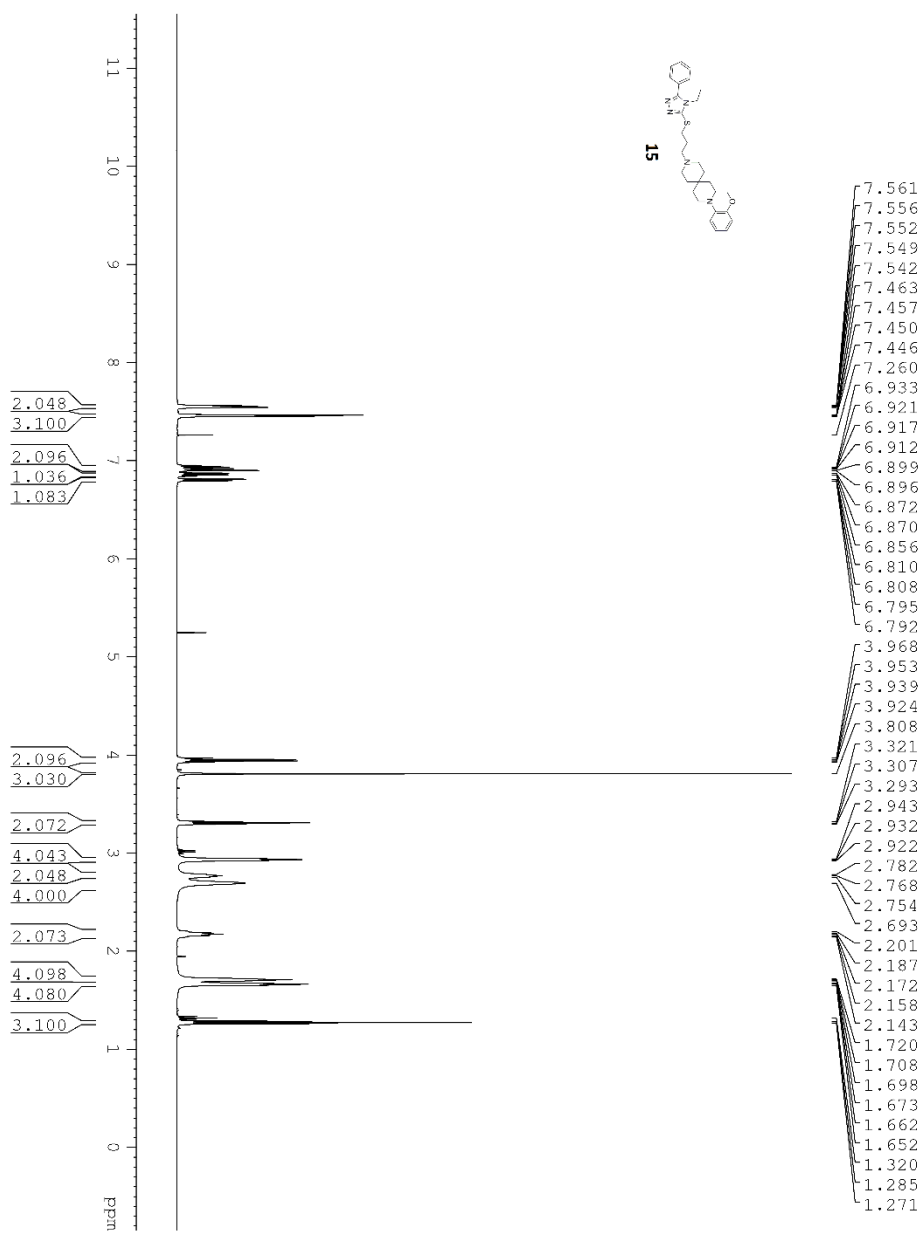

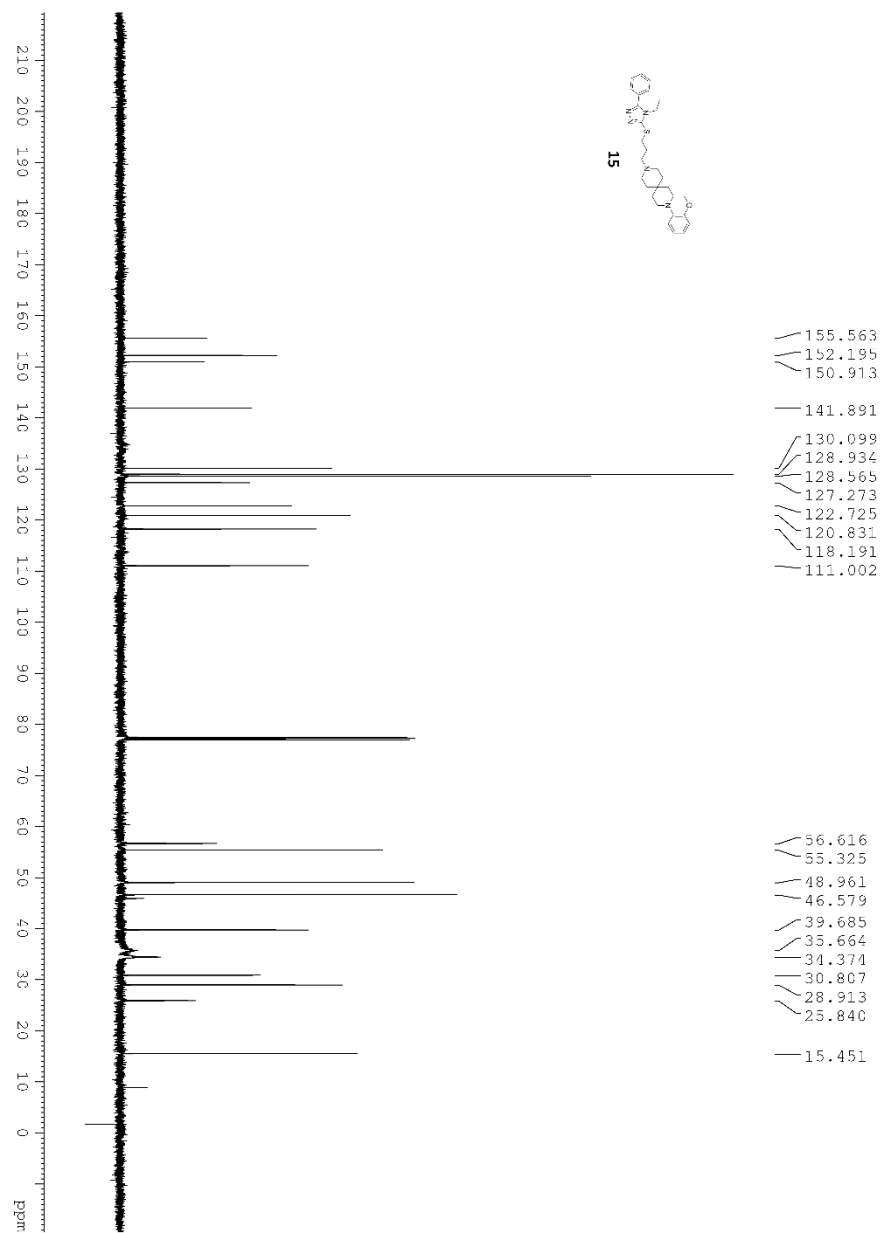

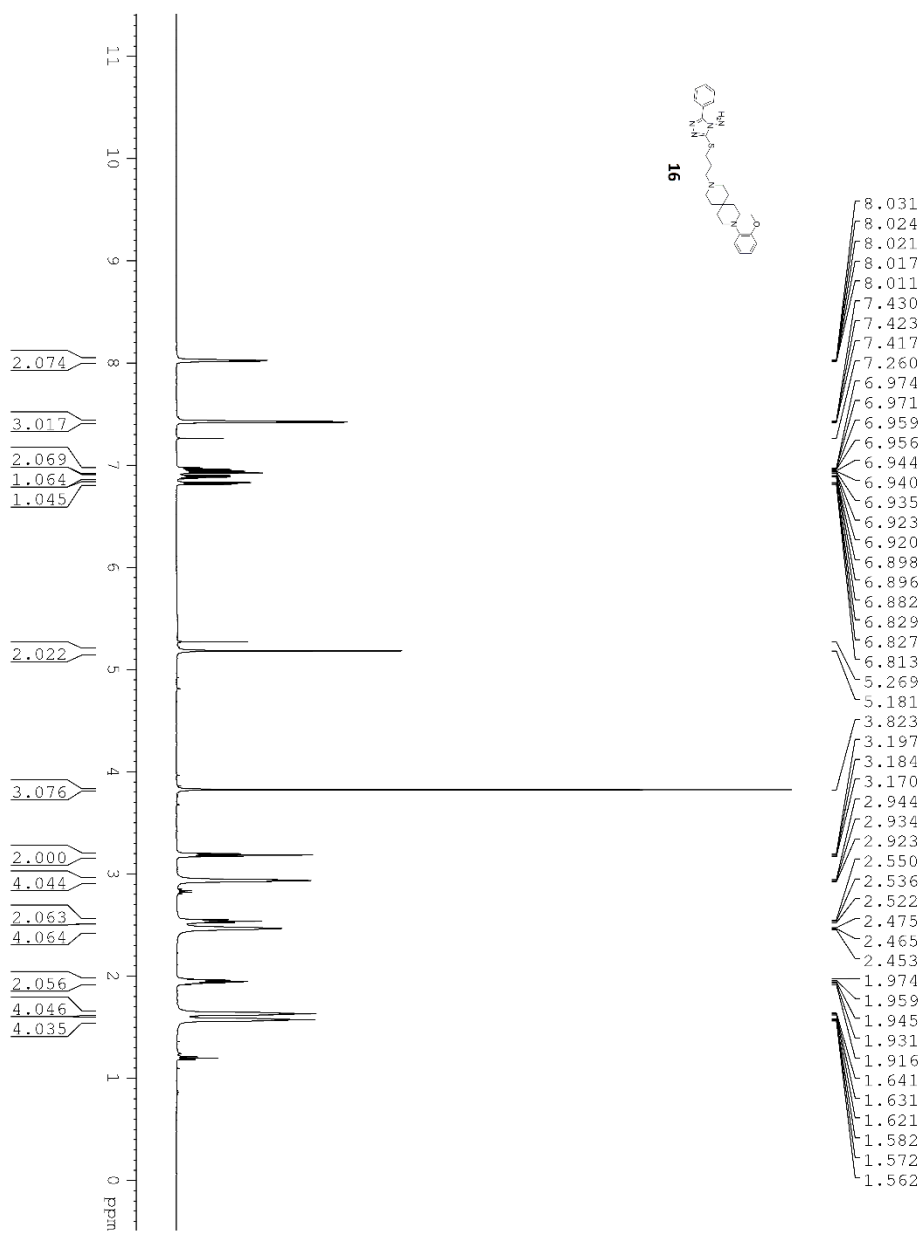



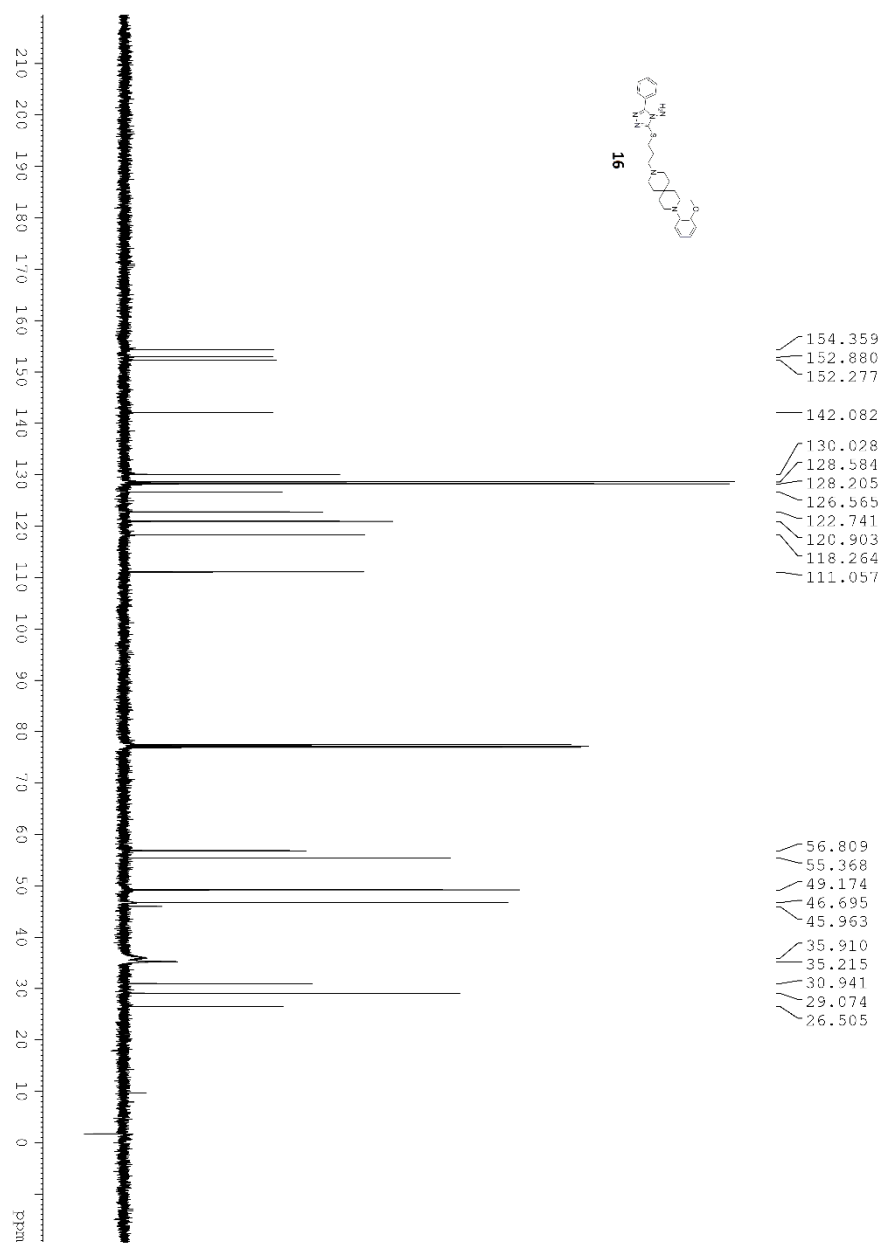

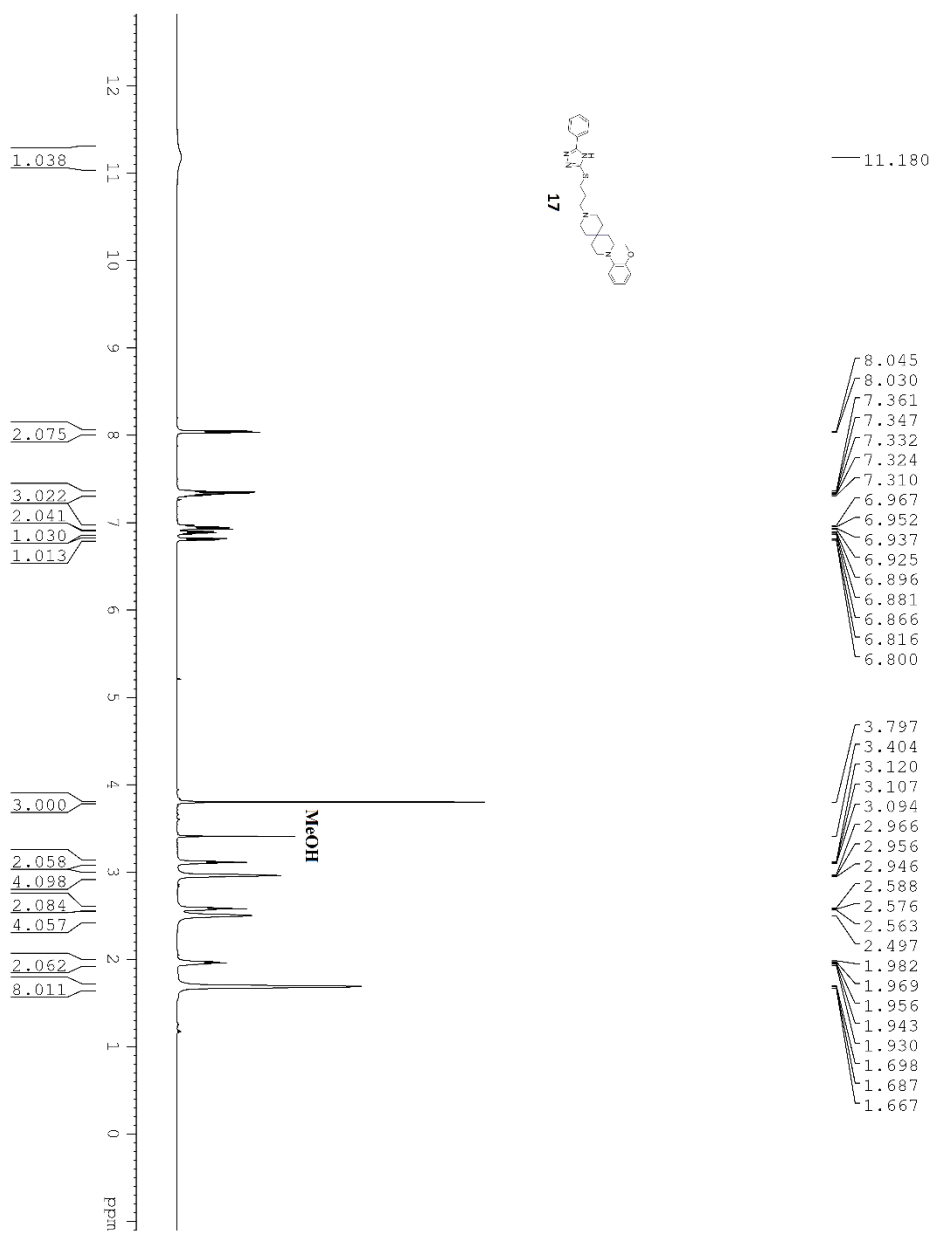

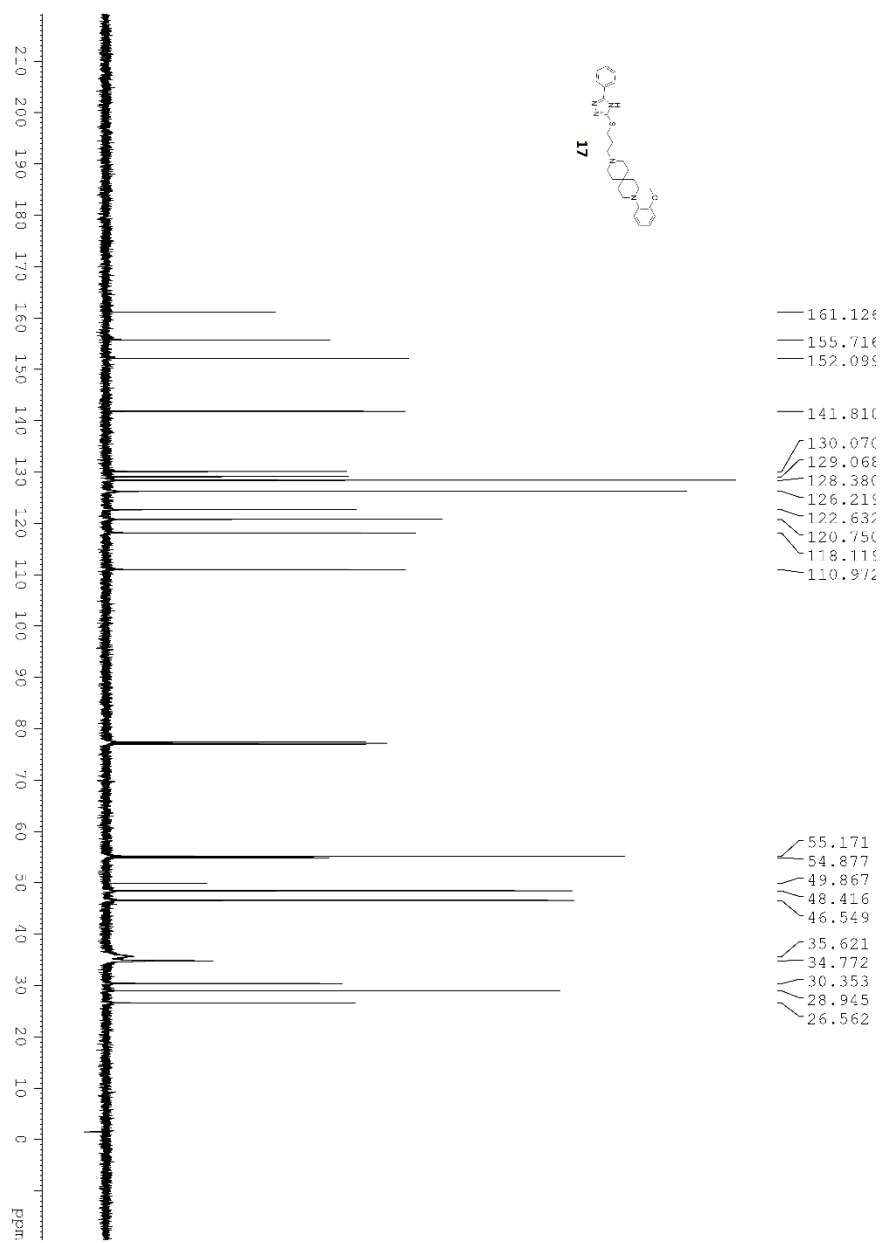

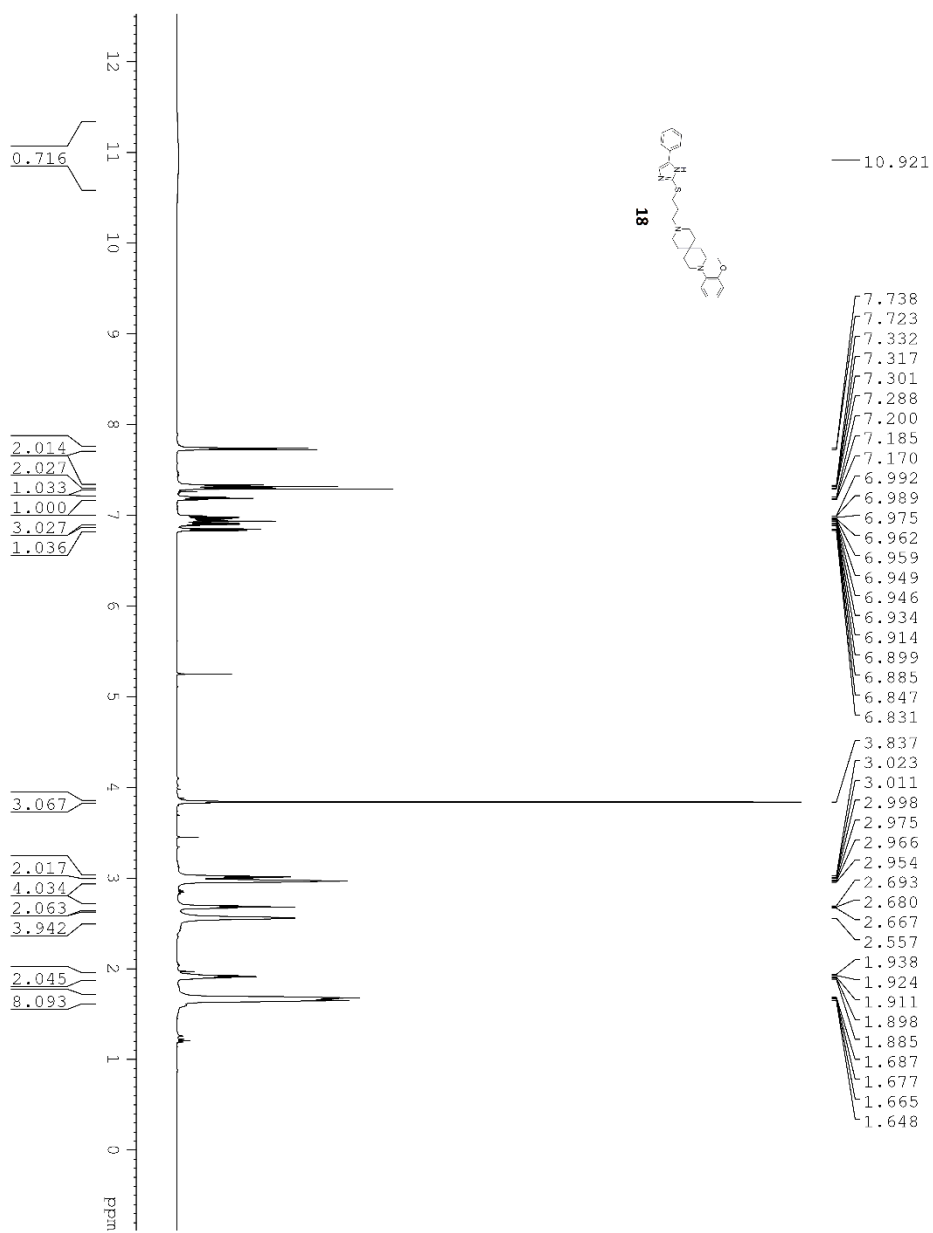

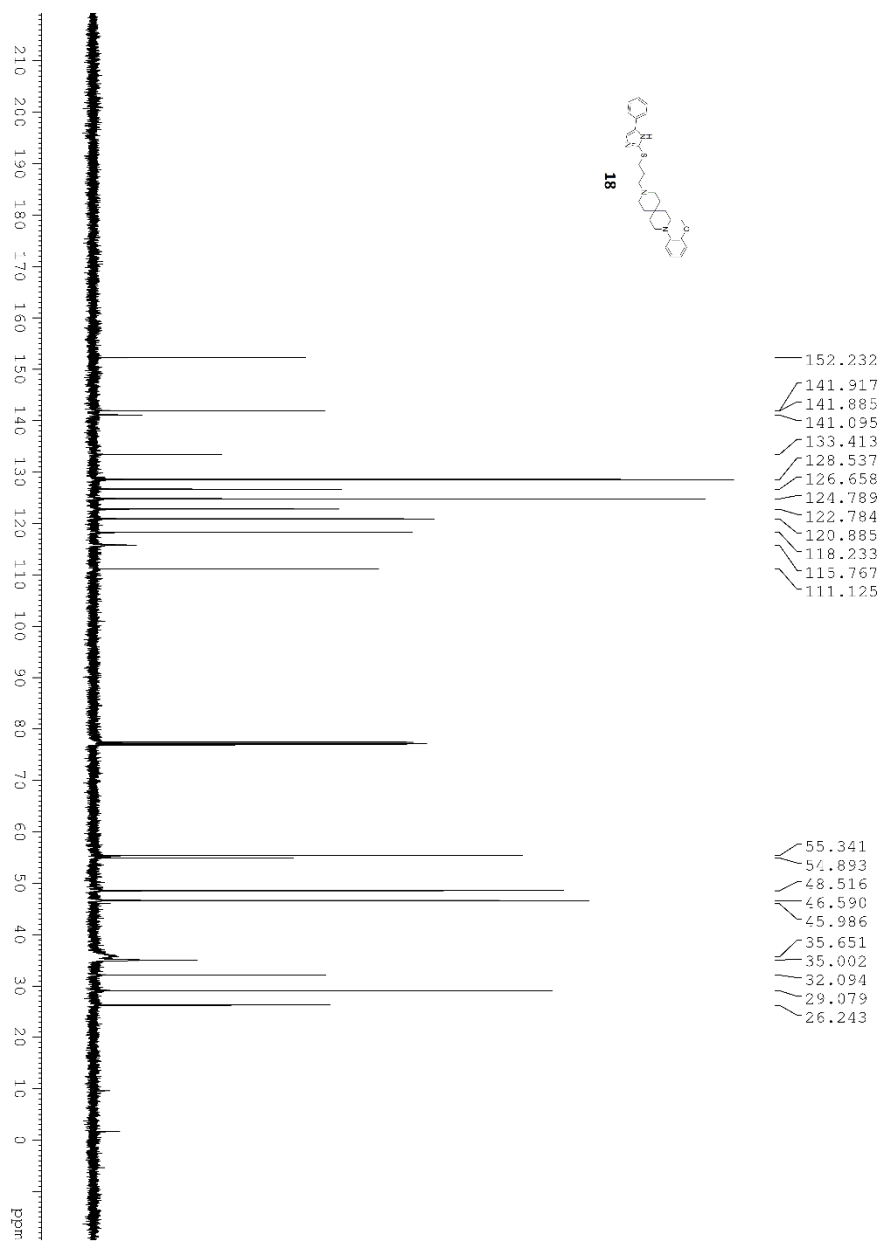

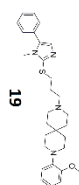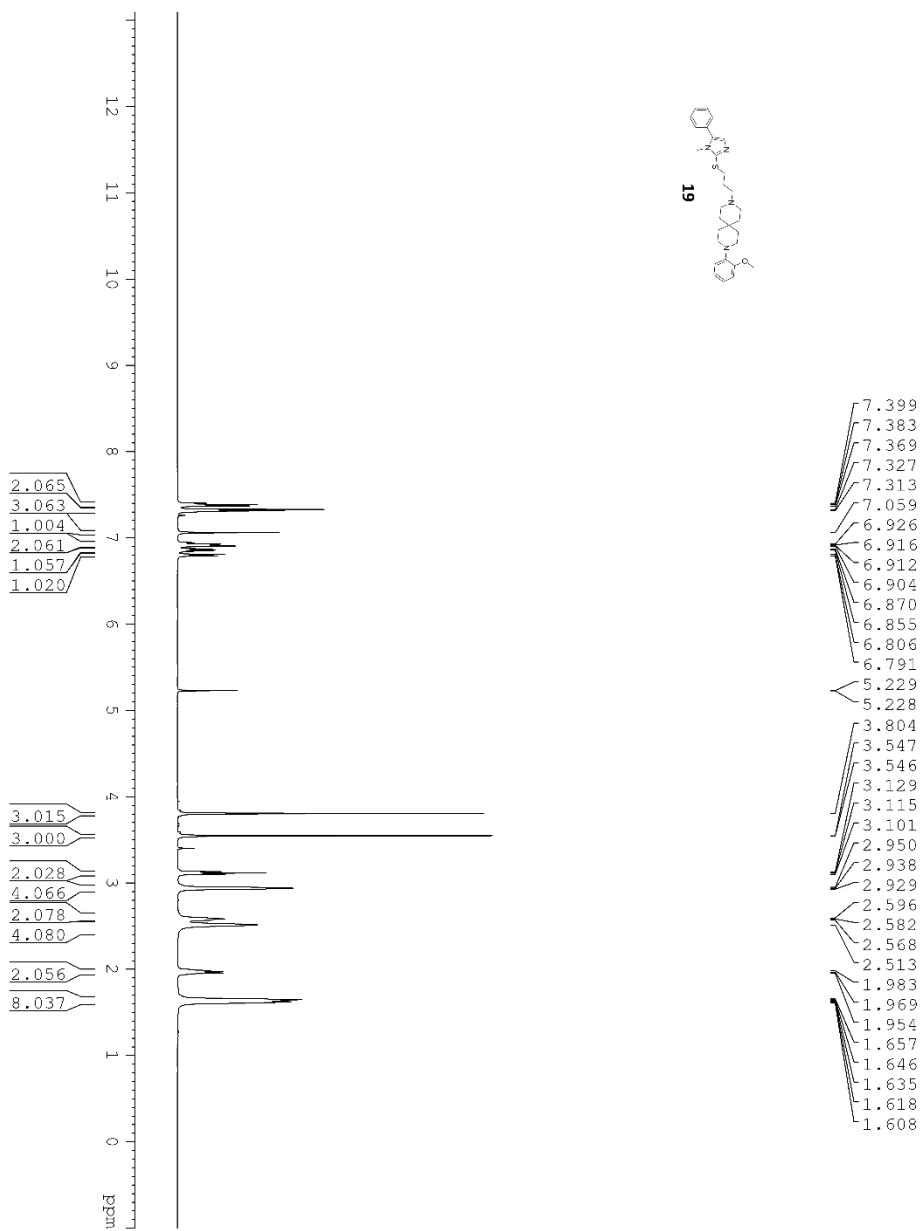

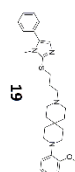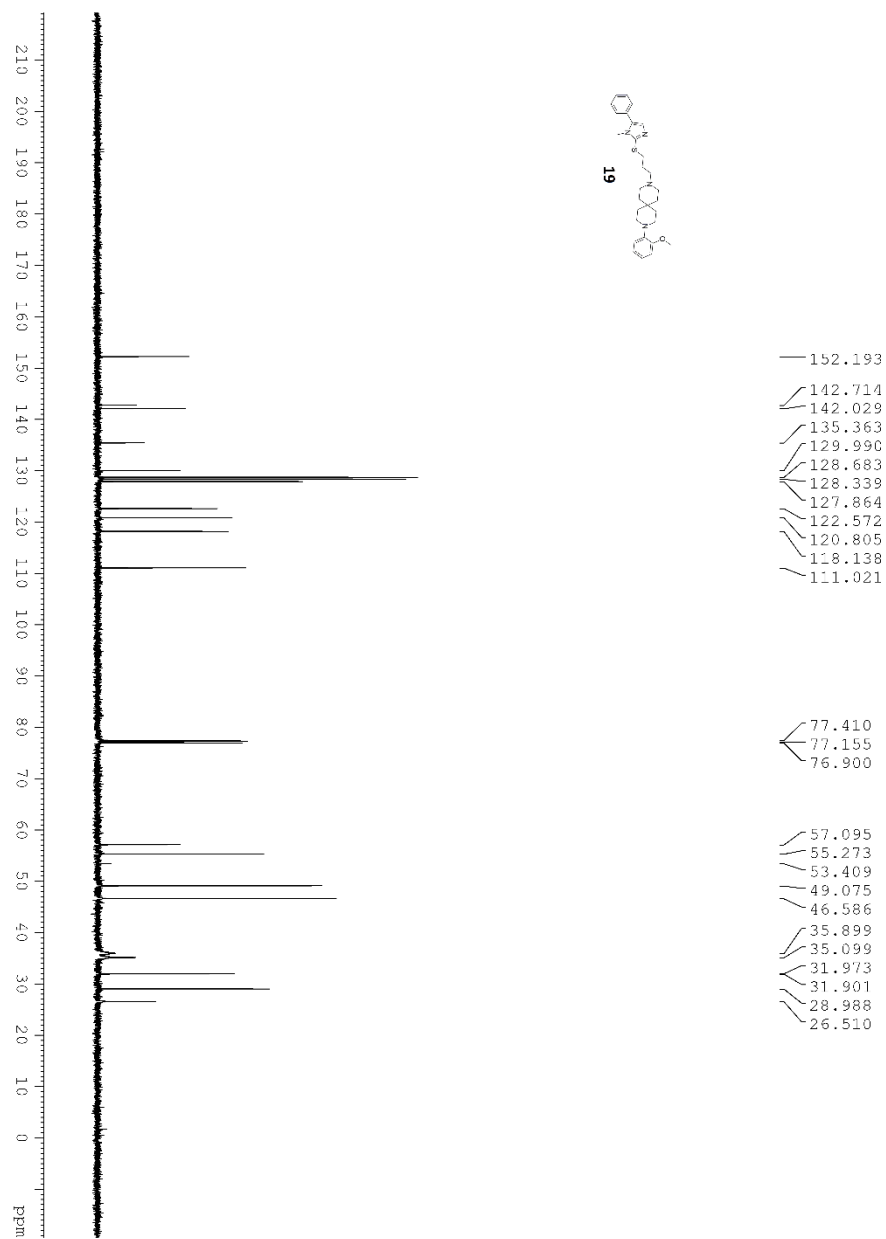

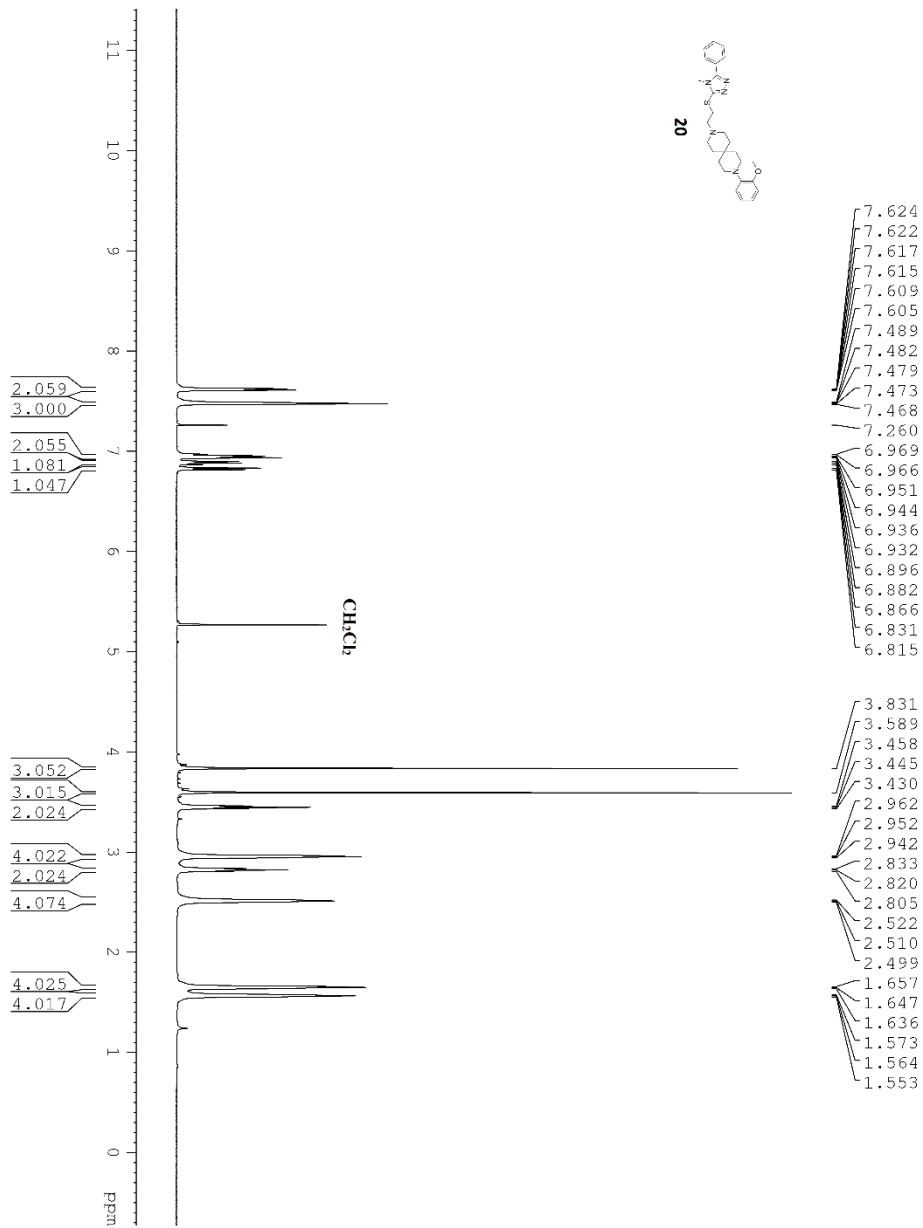



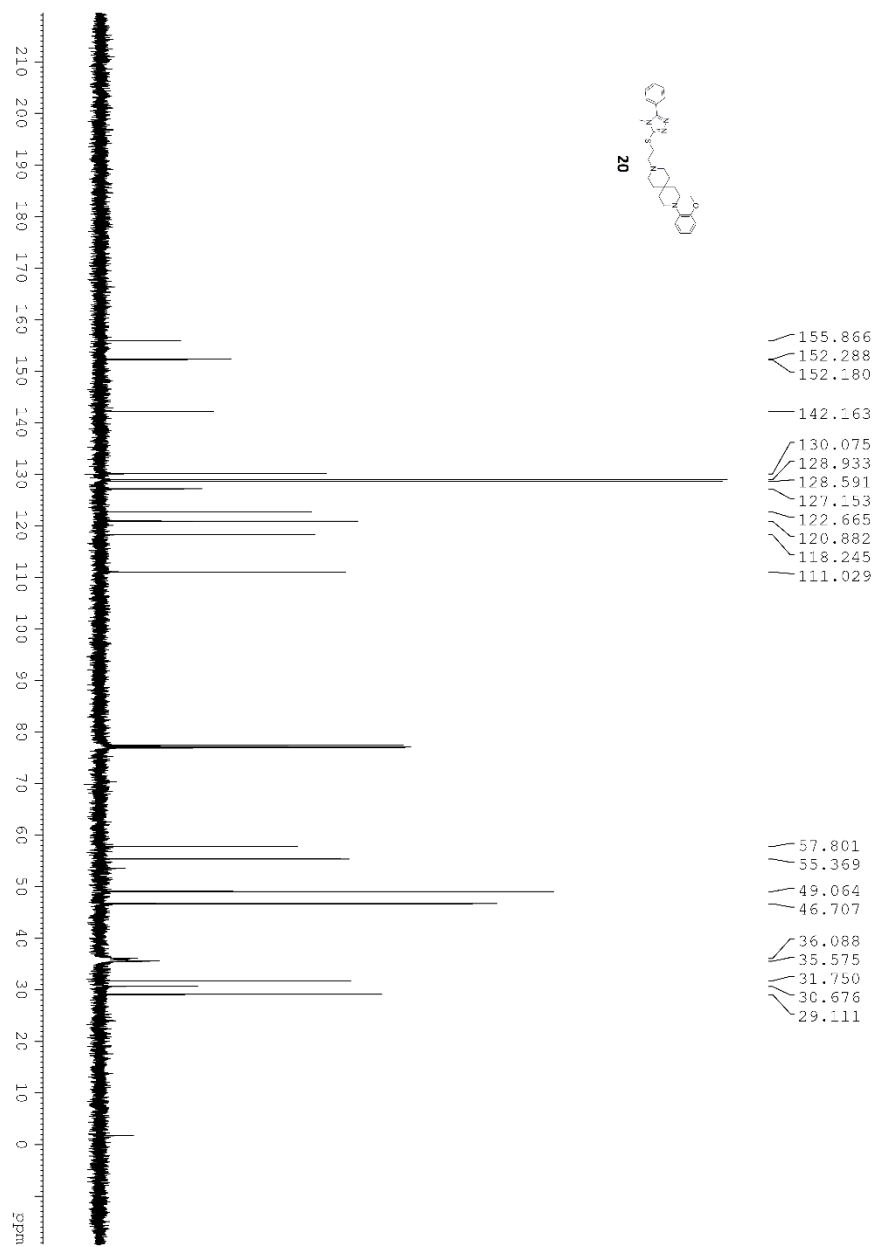

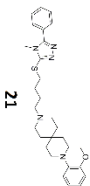

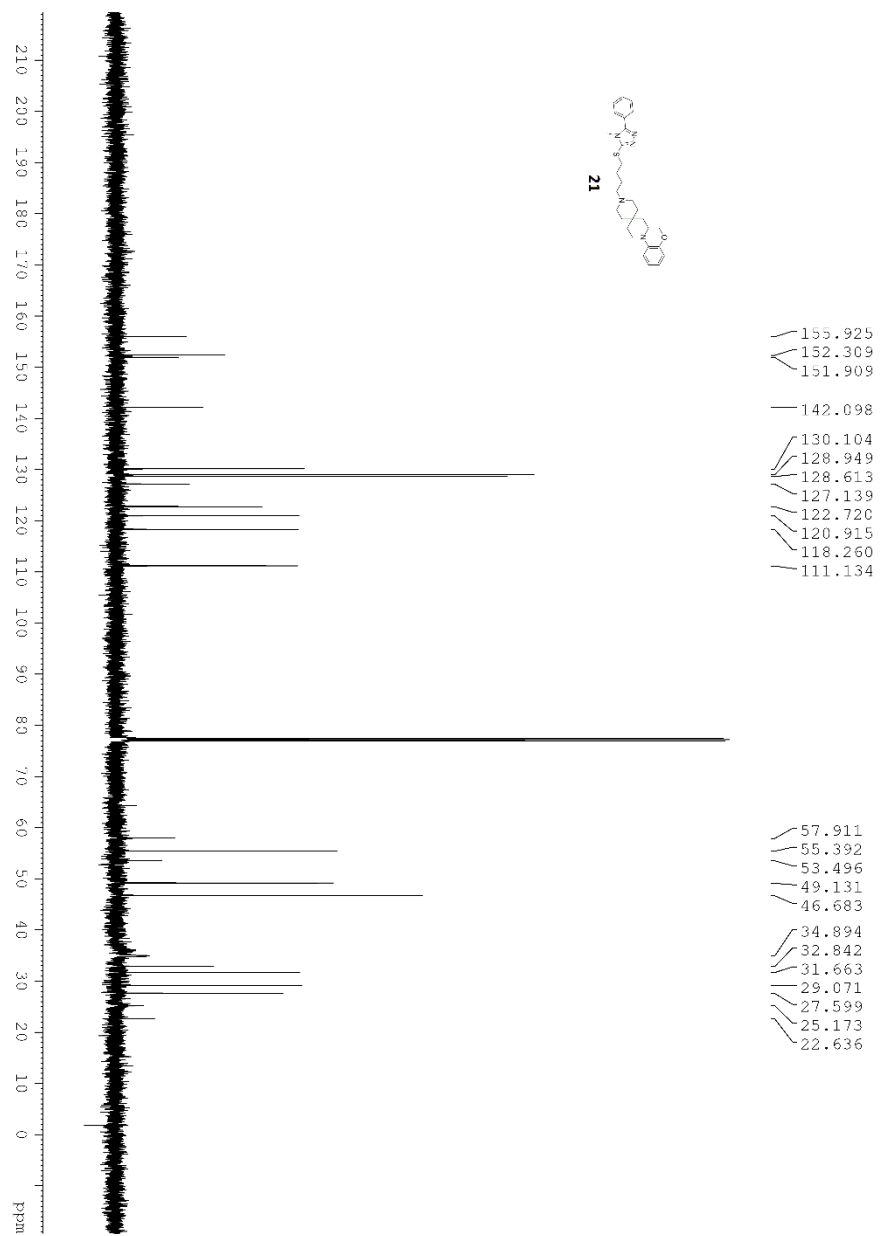

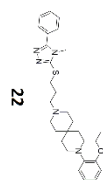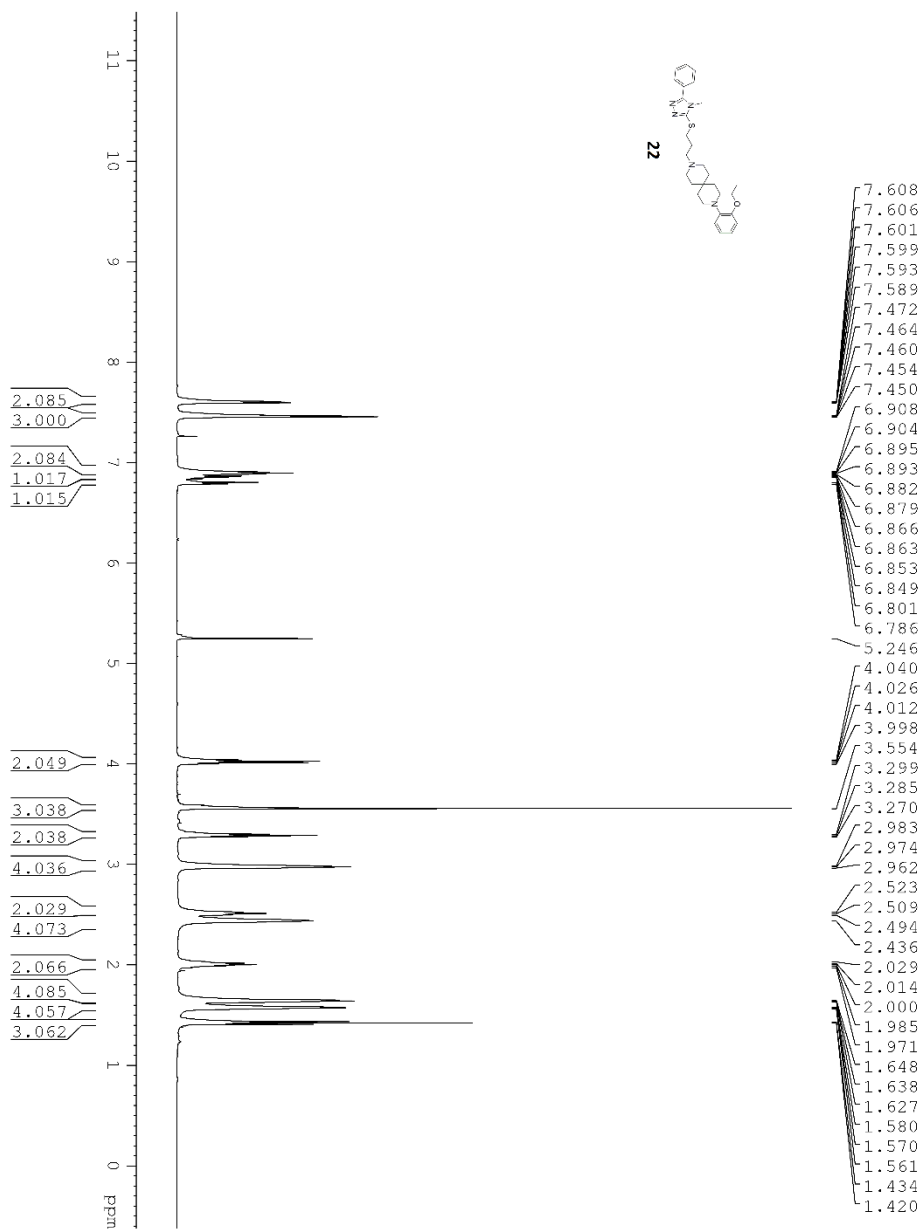

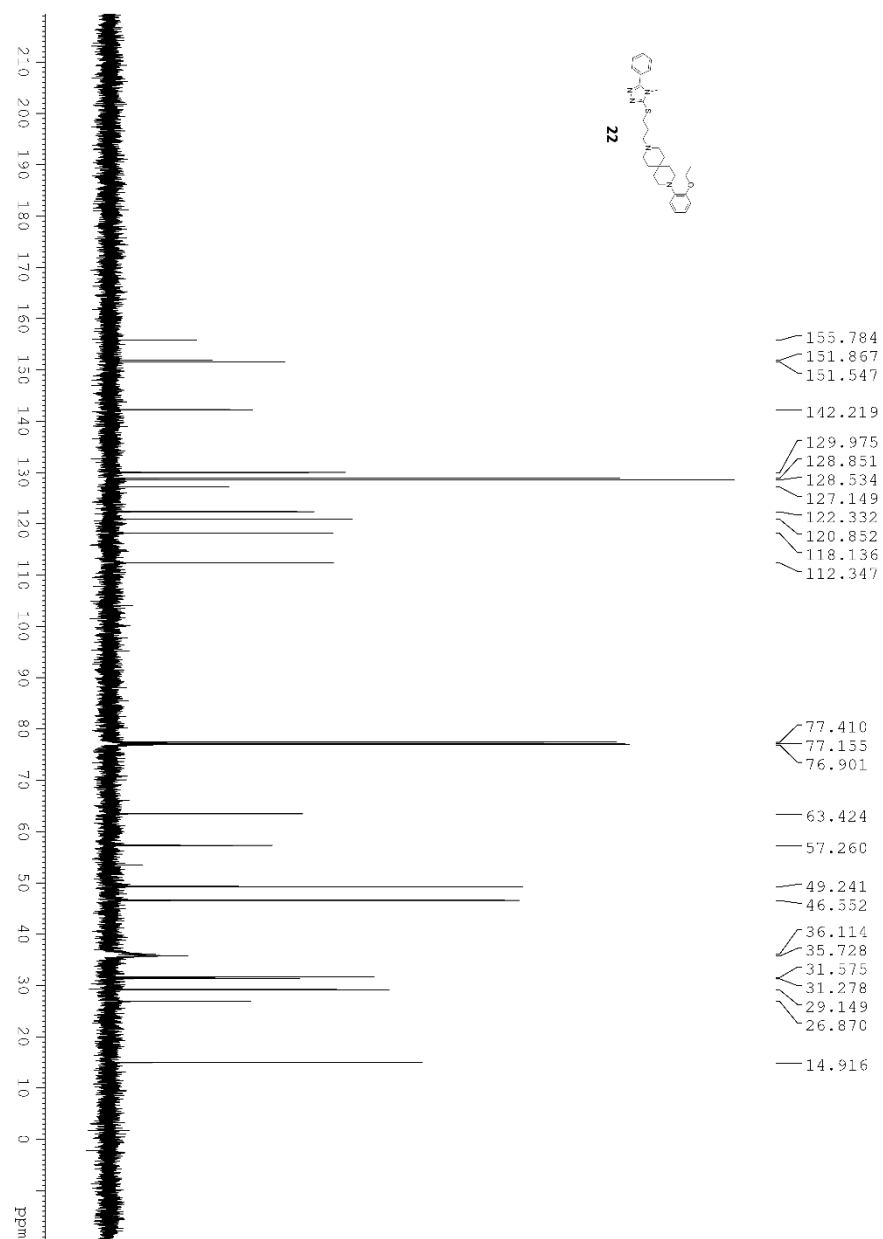

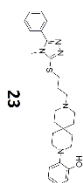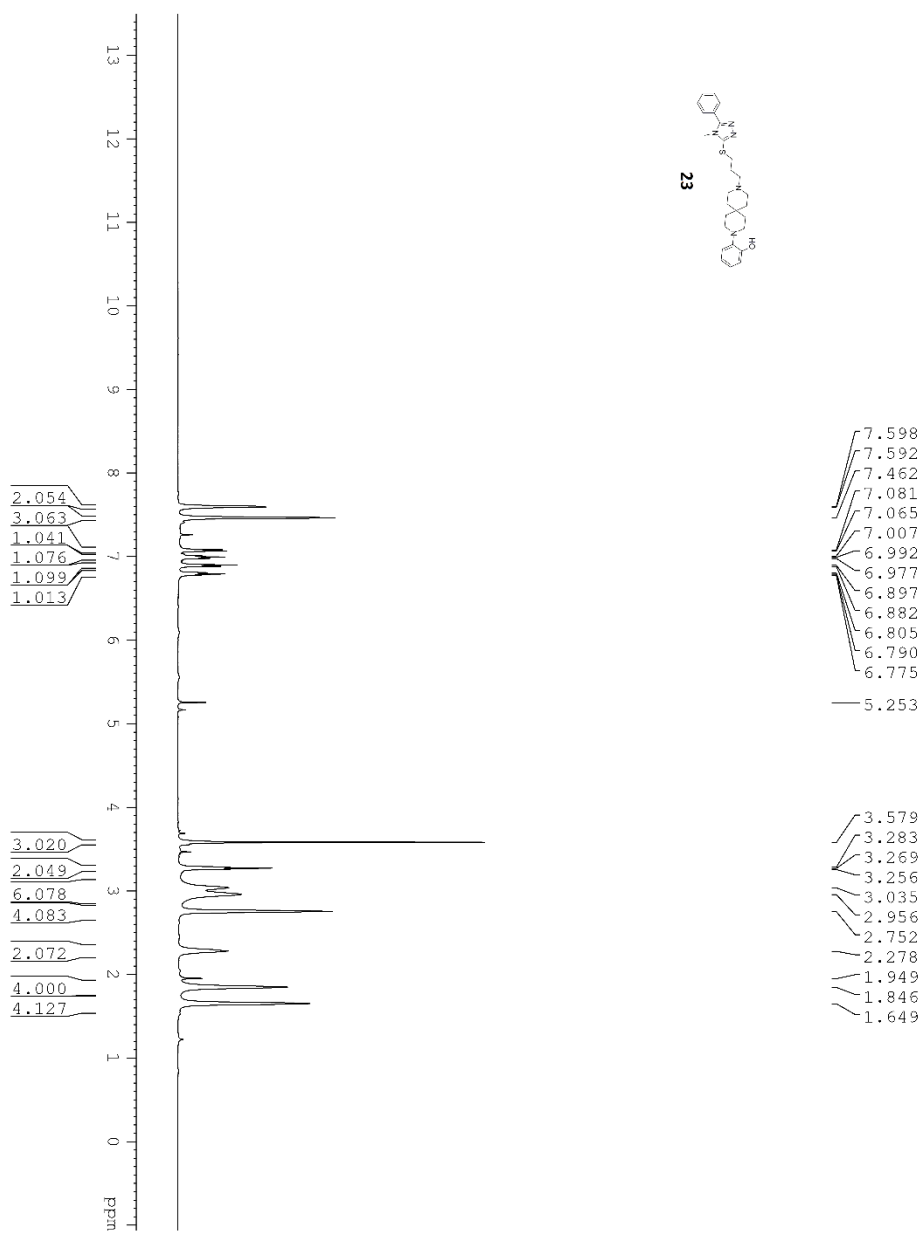

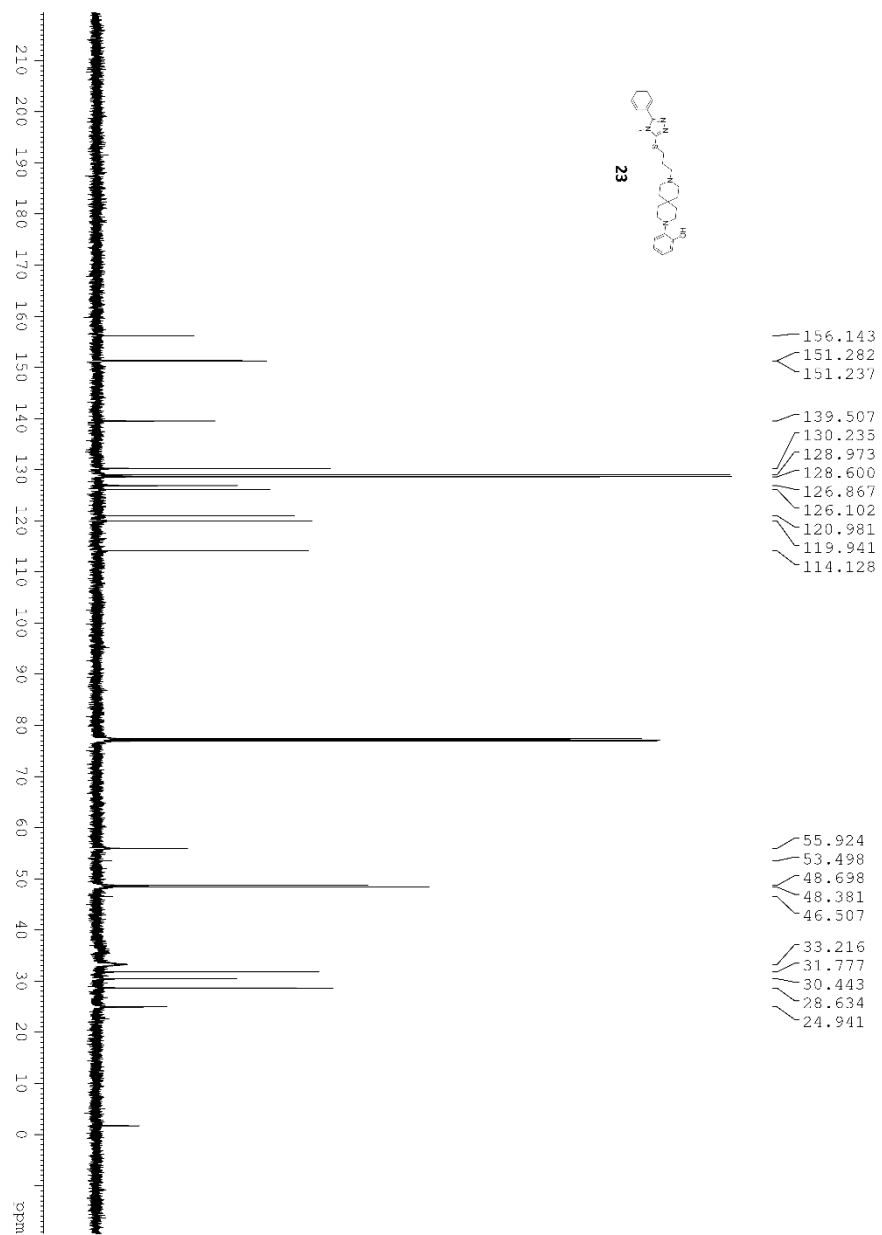





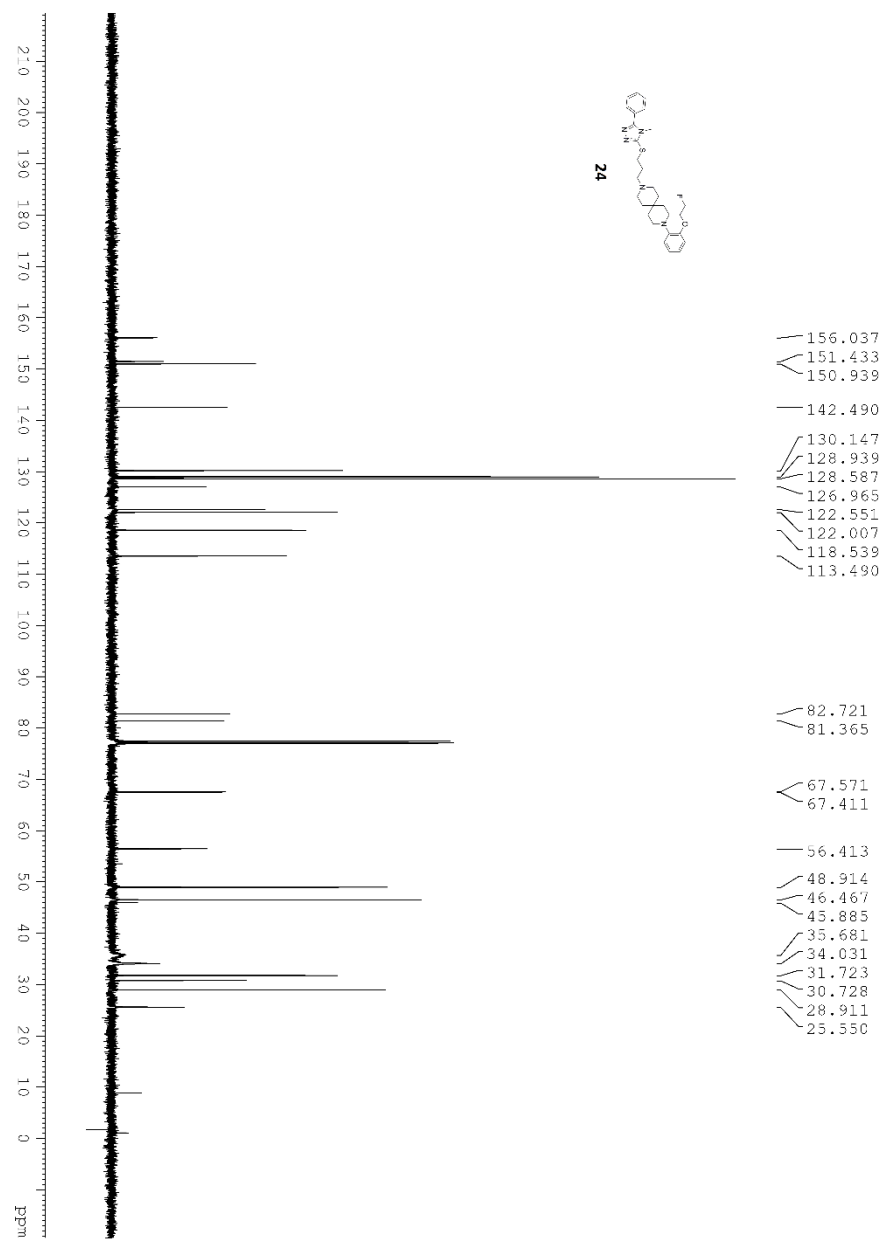

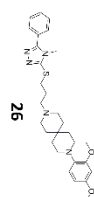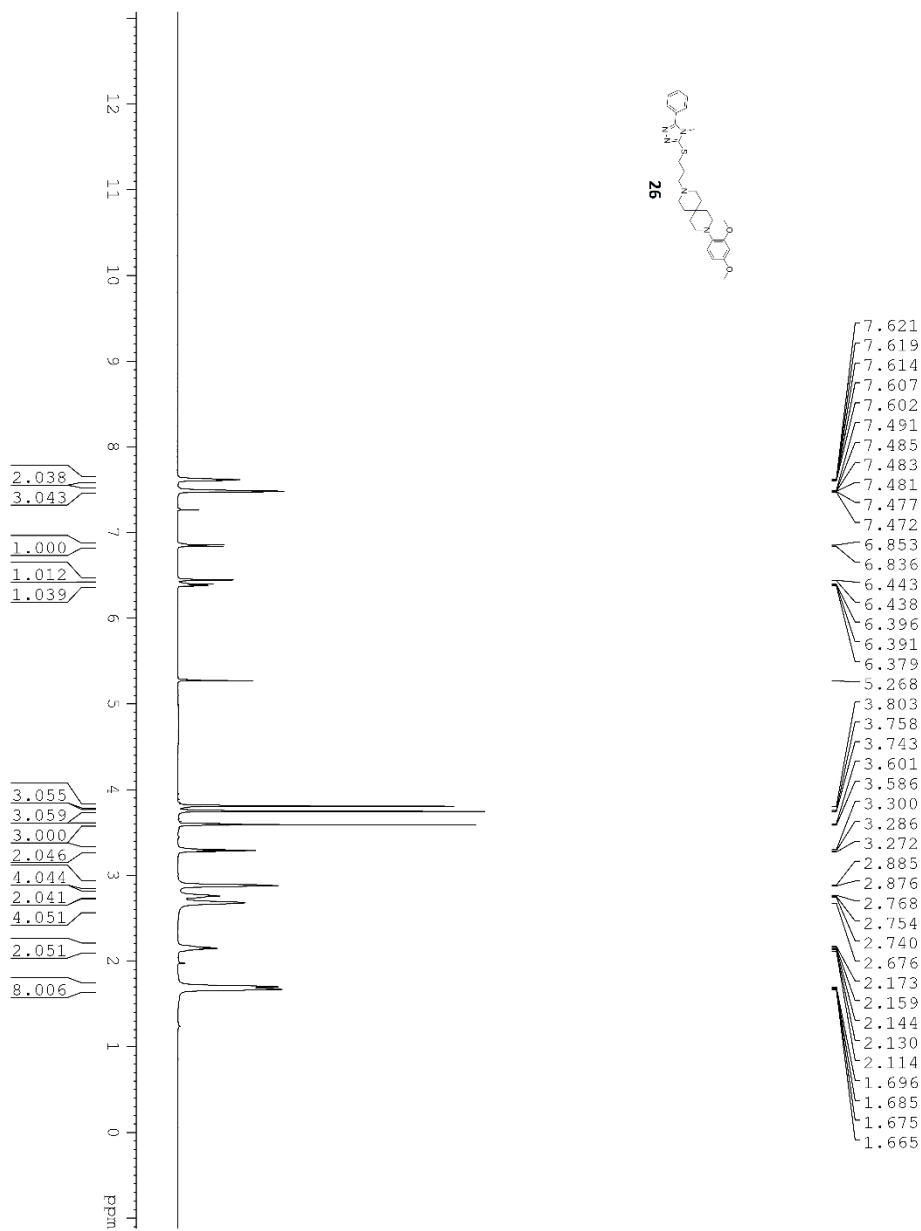



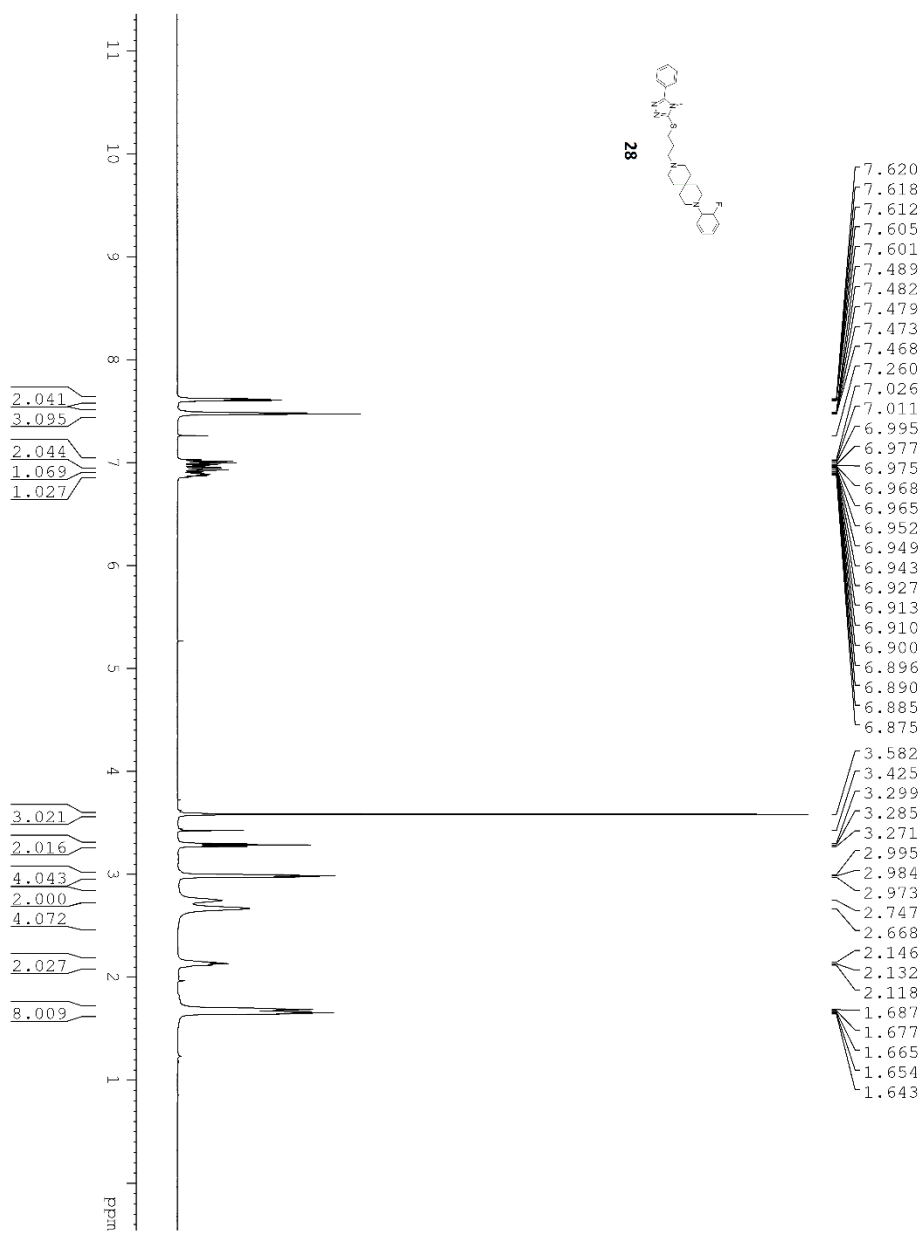

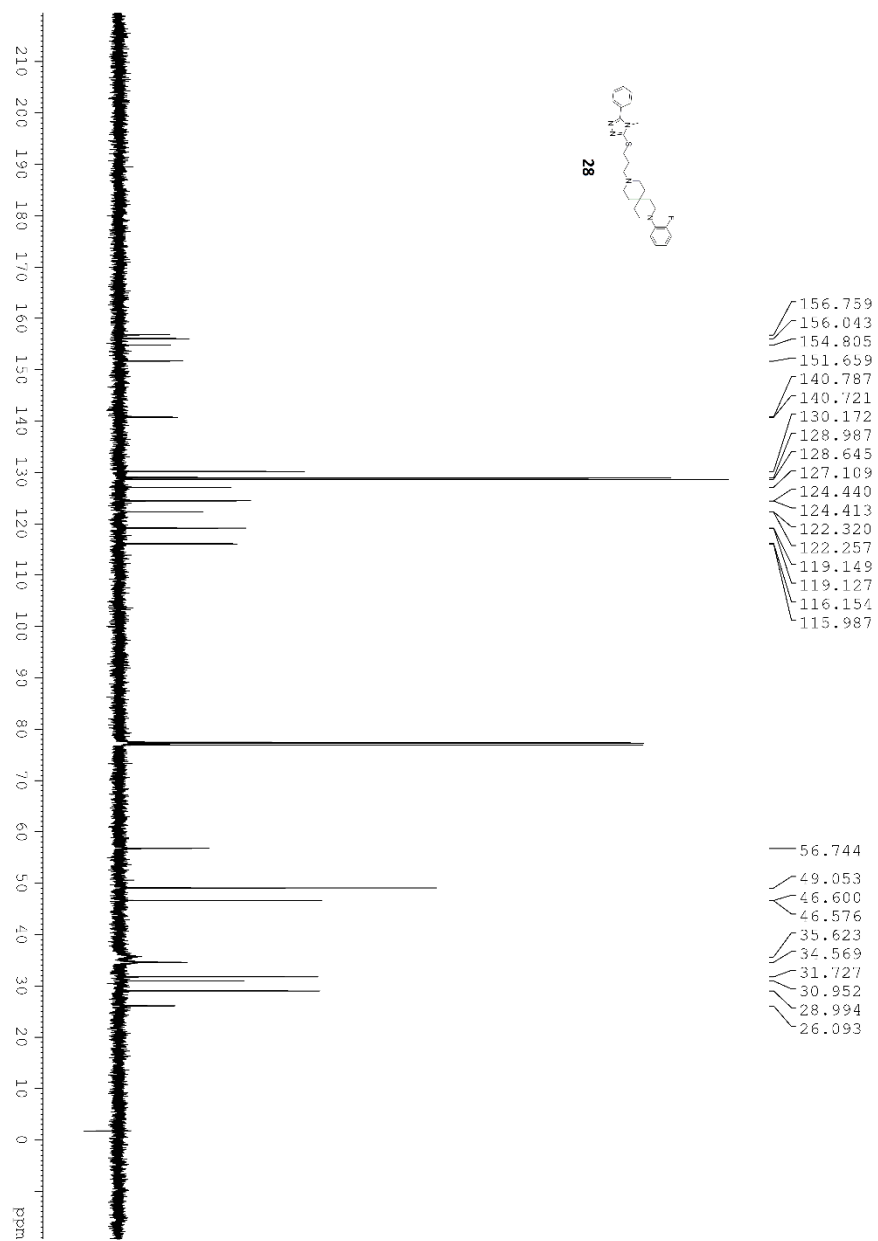

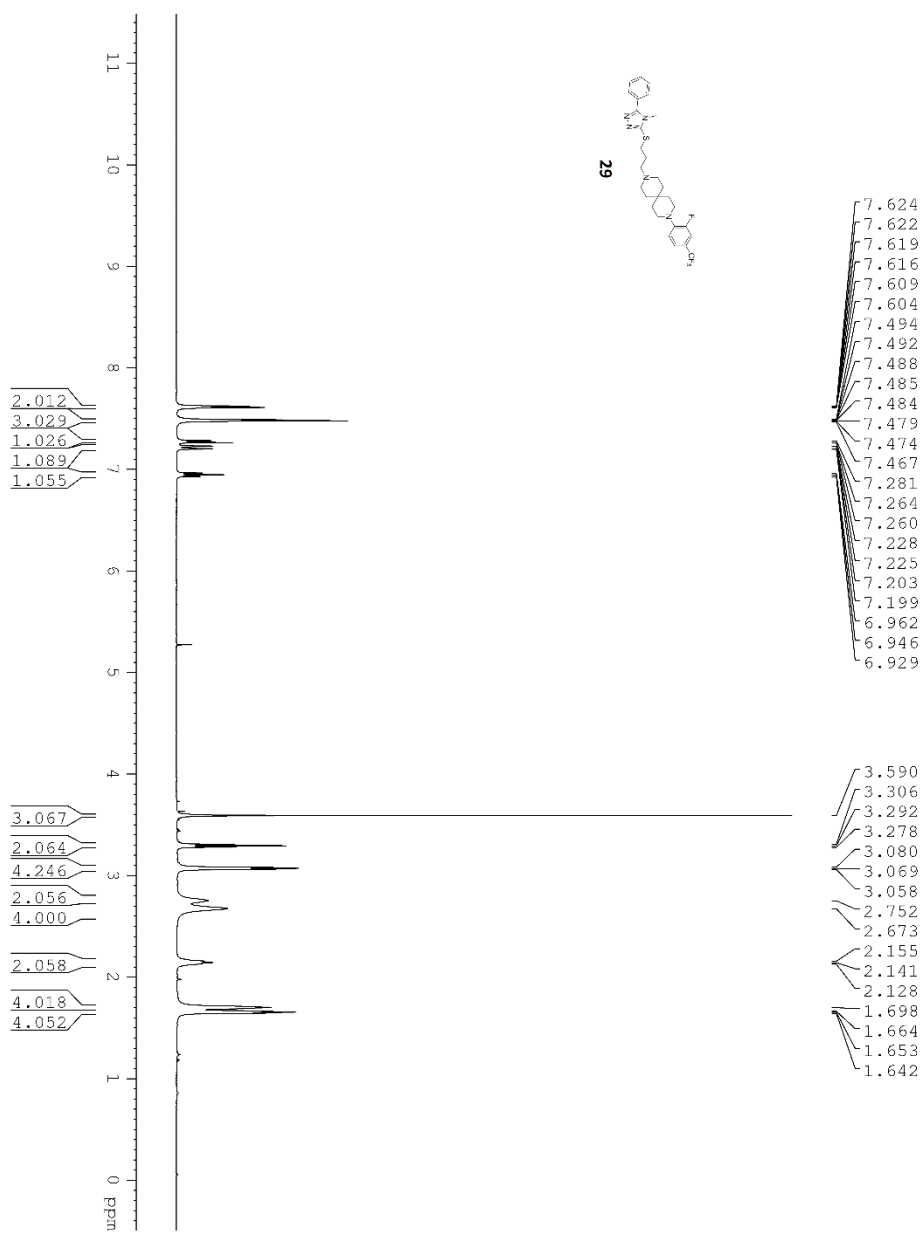

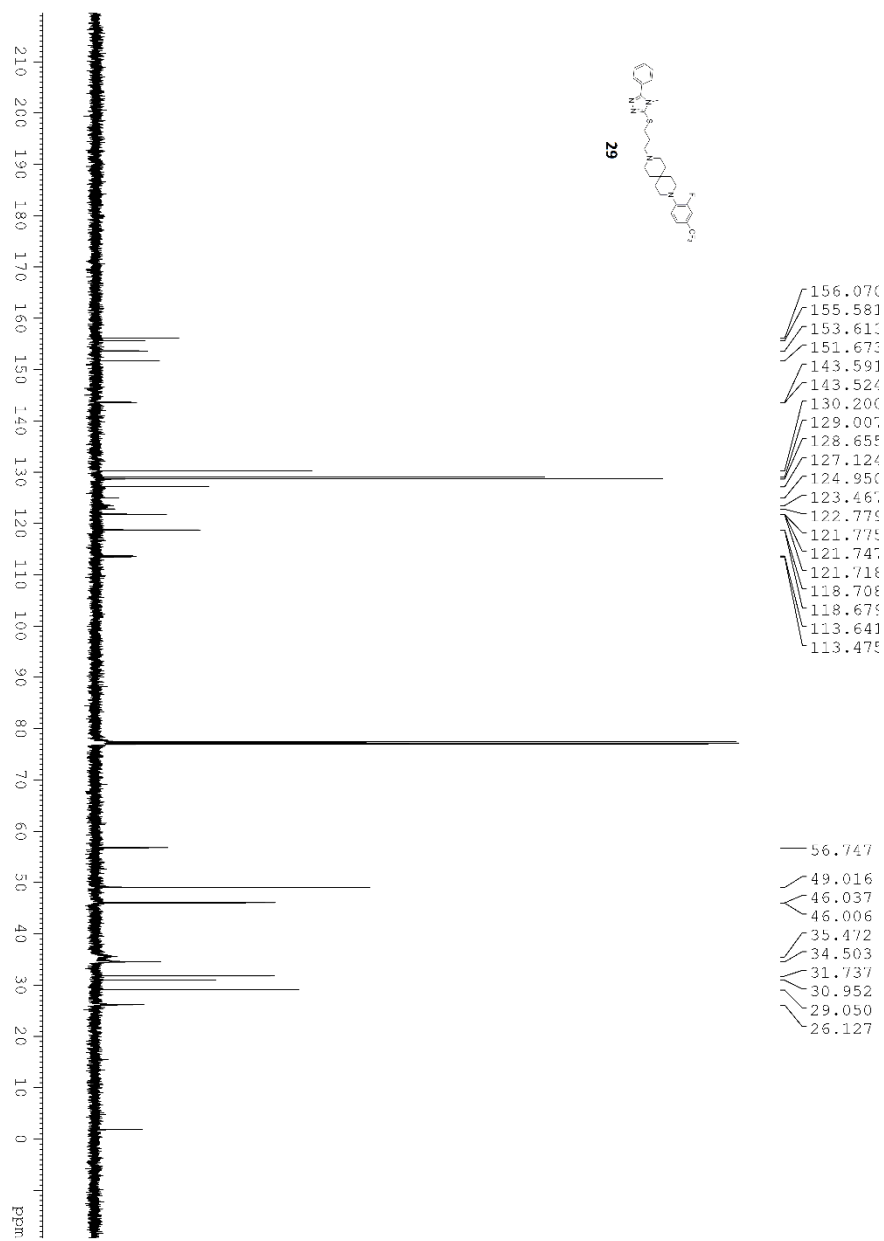

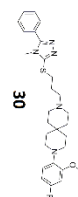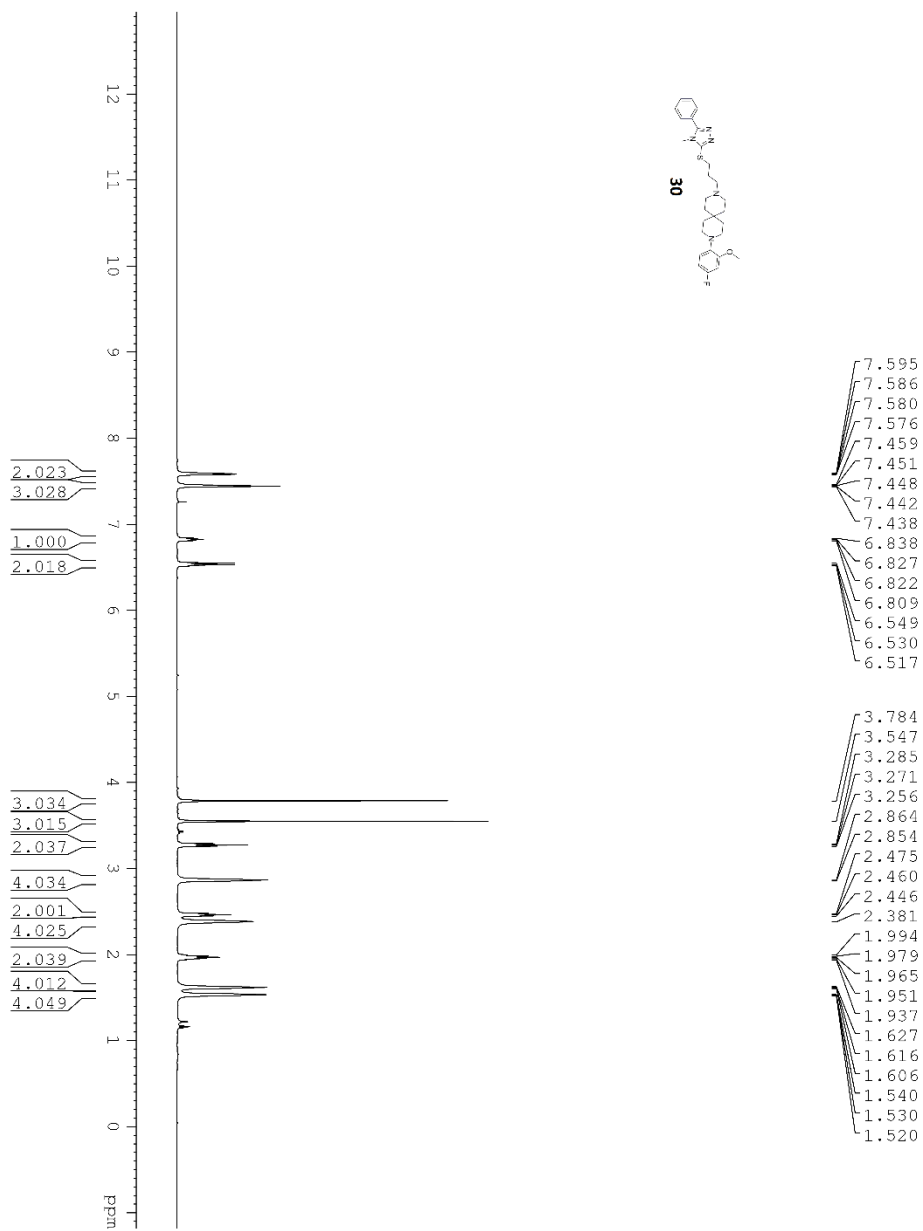



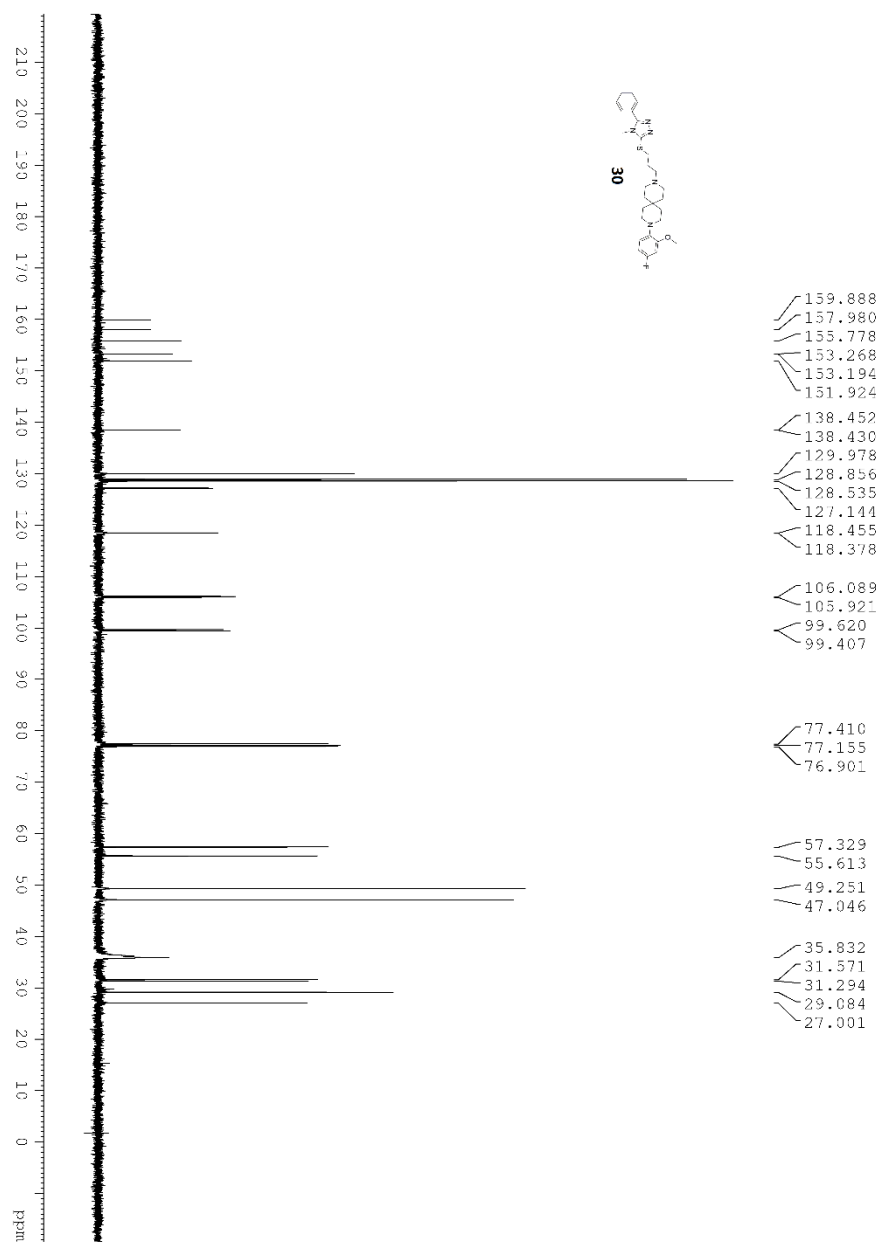

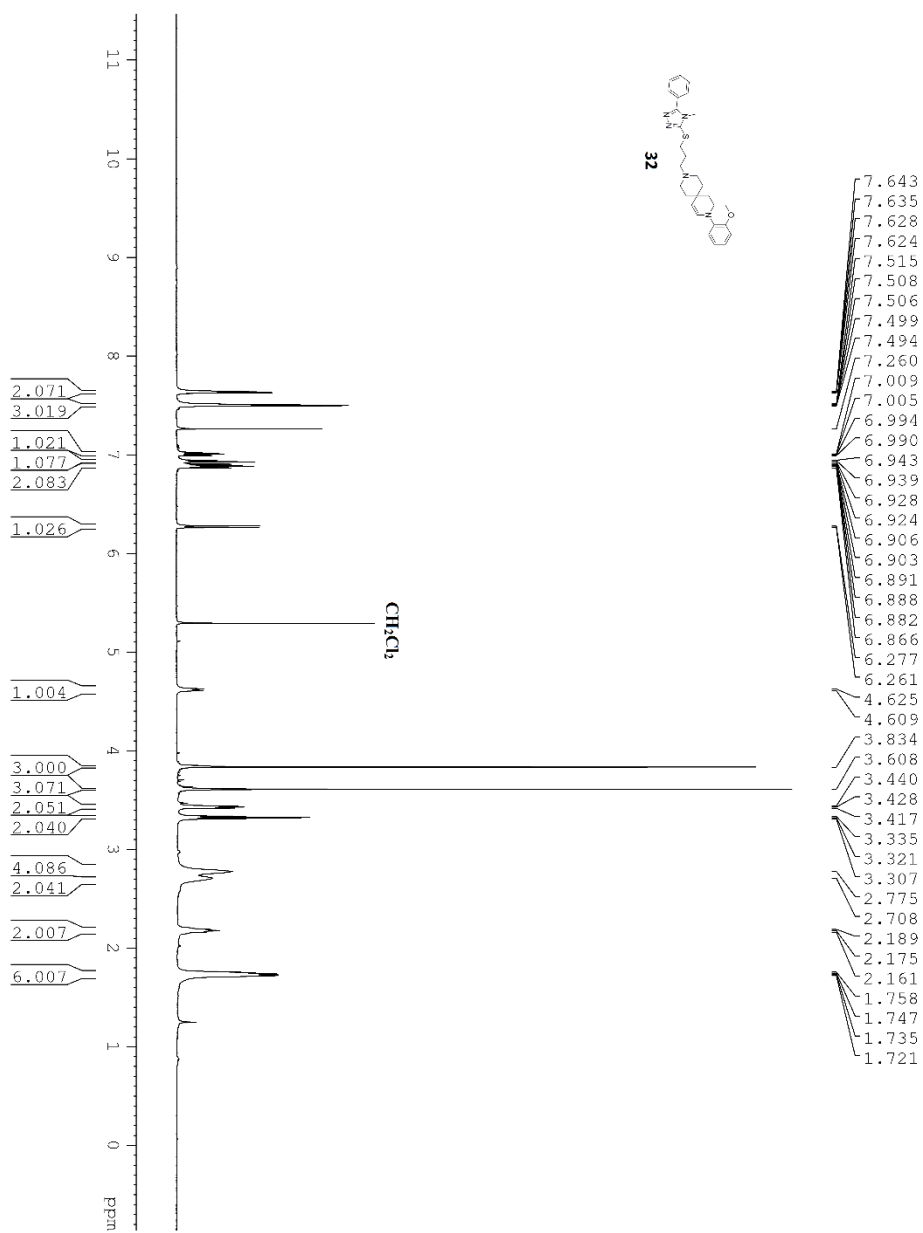

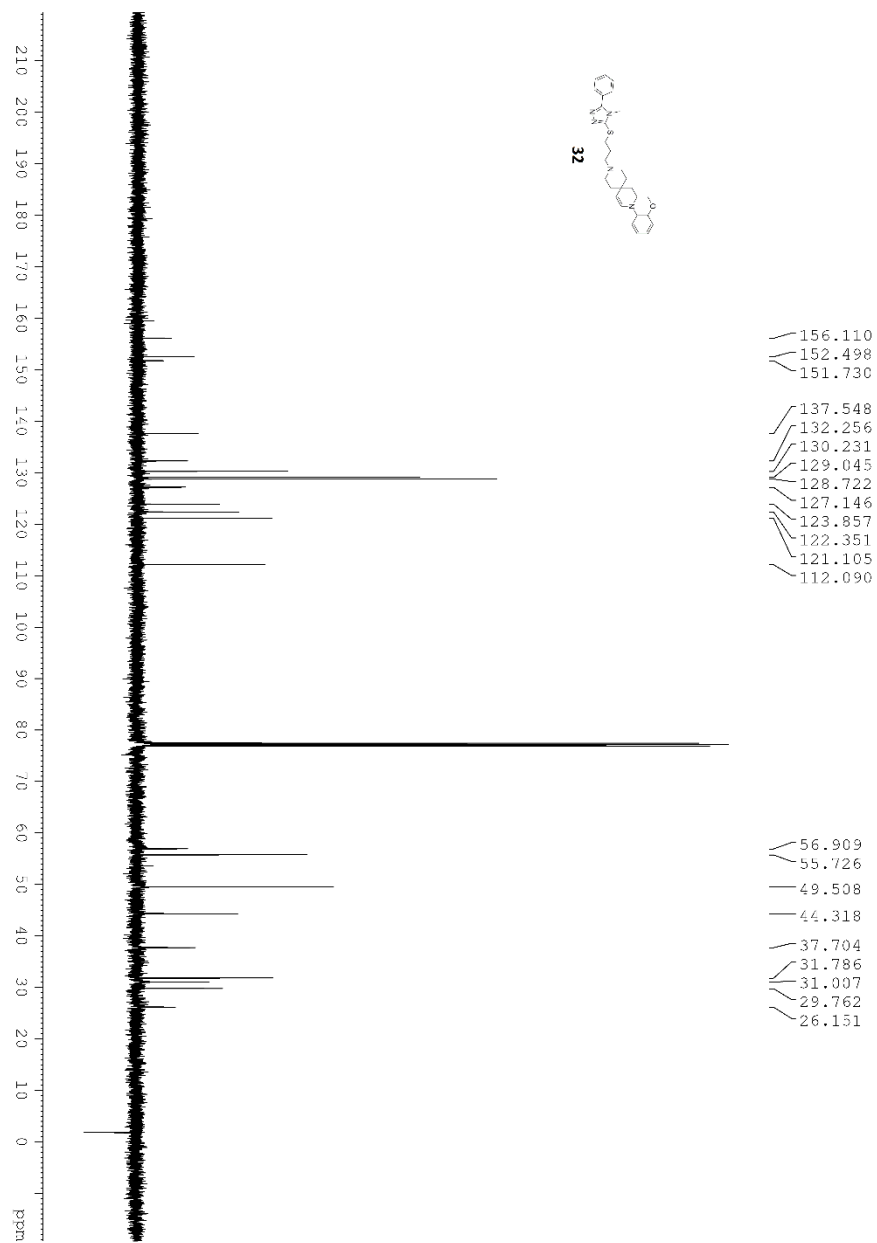

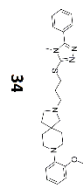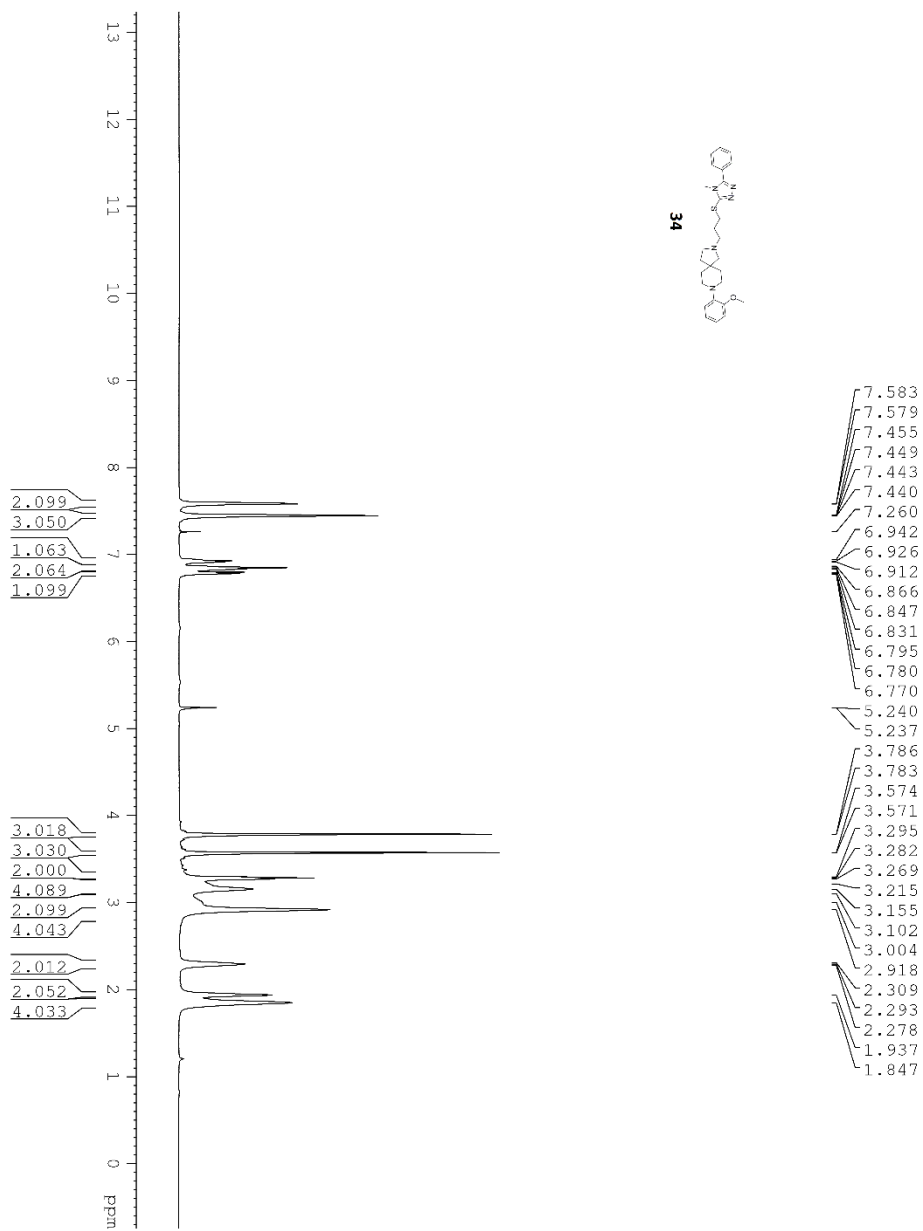

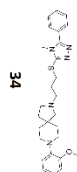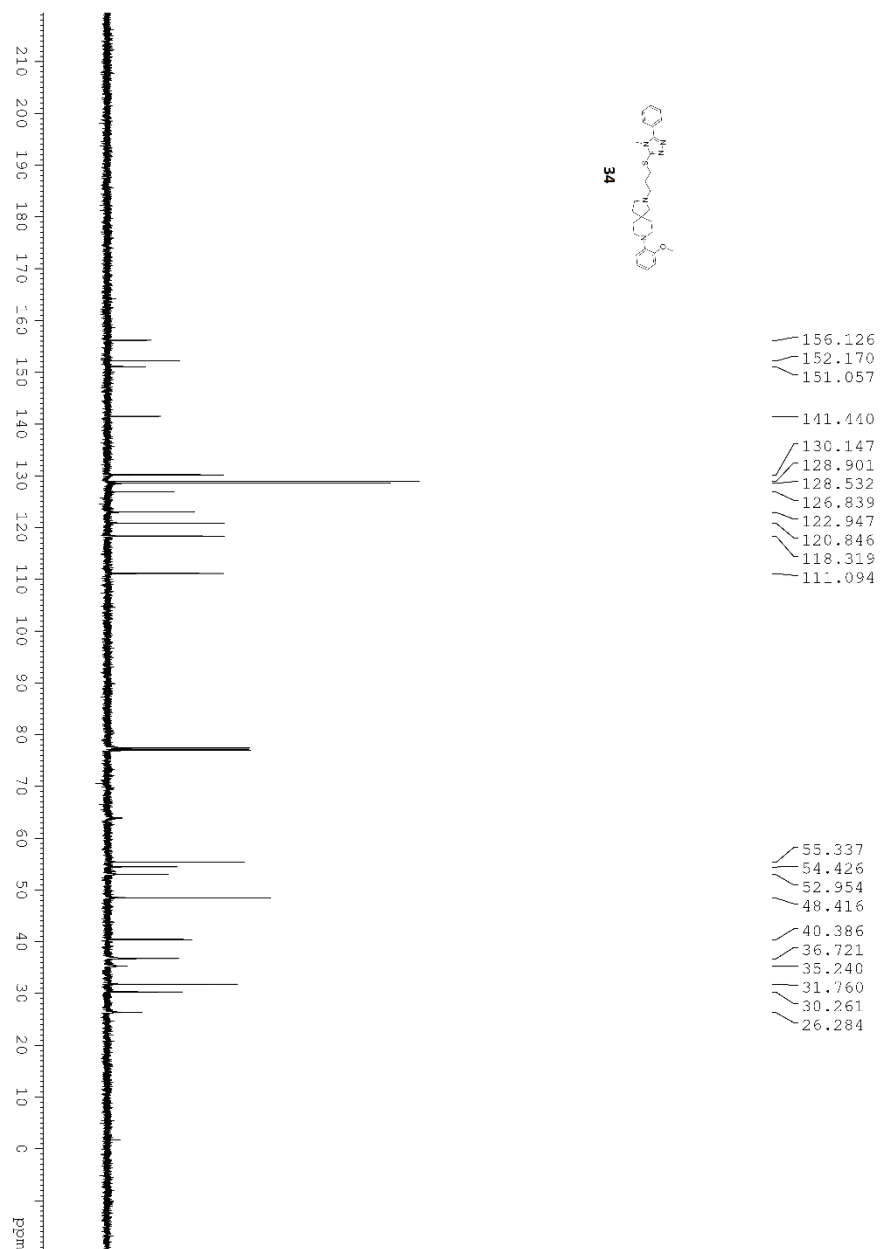

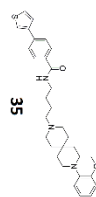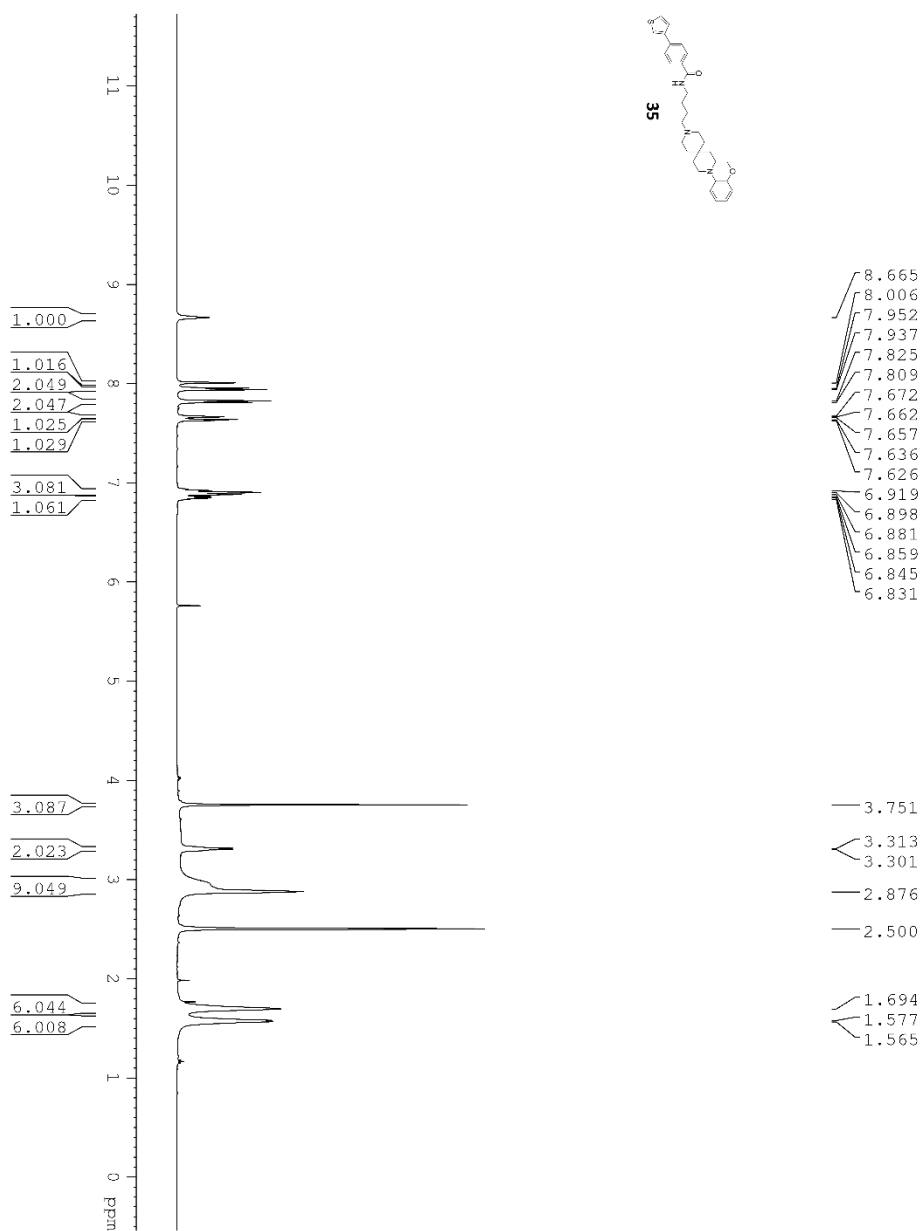

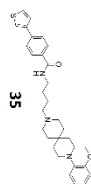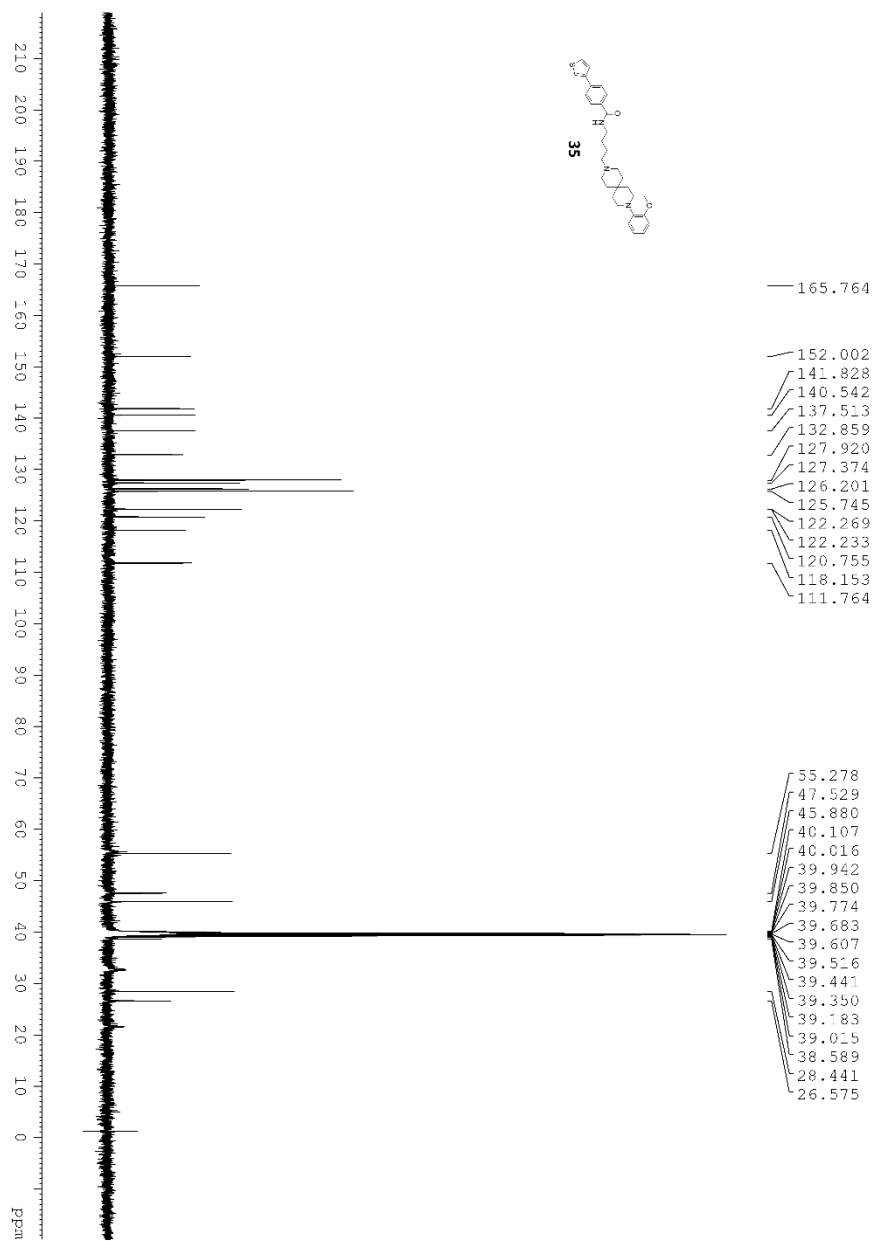

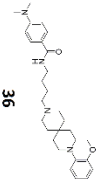



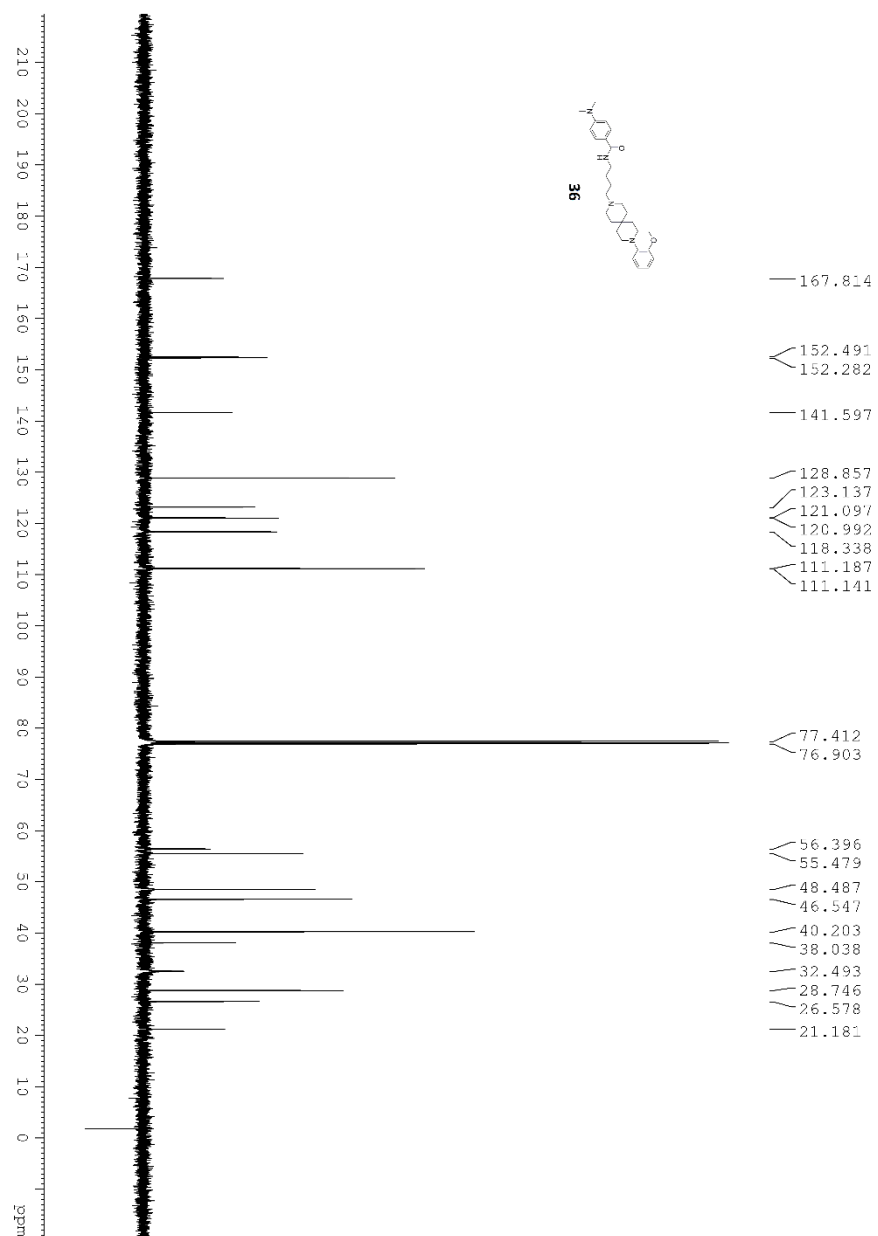

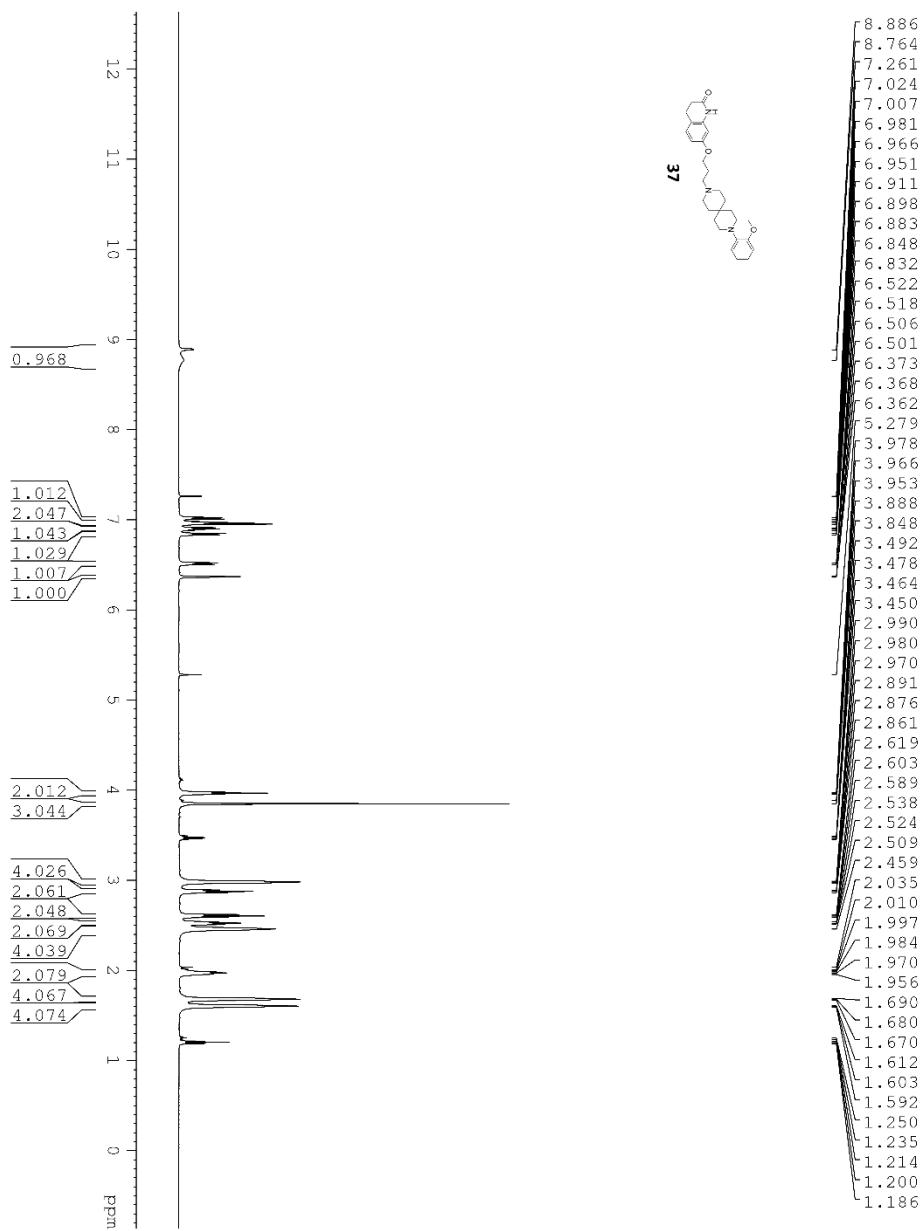

Supplement: Supplementary file 1 [file 15078434]
